# Supplementary material for: Evaluating New Chemistry to Drive Molecular Discovery: Fit for Purpose?
Source: PubMed Central journal article supplement (PMC5113762; doi:10.1002/anie.201604193), 2016-08-30
Supplement: ANIE-55-13650-s001.pdf [file ANIE-55-13650-s001.pdf]

Supporting Information

**Evaluating New Chemistry to Drive Molecular  
Discovery: Fit for Purpose?**

*Daniel J. Foley, Adam Nelson,\* and Stephen P. Marsden\**

anie\_201604193\_sm\_miscellaneous\_information.pdf

## Supporting Information

### Contents:

|                                                             |           |
|-------------------------------------------------------------|-----------|
| <b>1.0 Data mining analysis .....</b>                       | <b>2</b>  |
| <b>2.0 Virtual library enumeration using LLAMA .....</b>    | <b>12</b> |
| 2.1 LLAMA Standard Capping Groups (LSCGs).....              | 13        |
| 2.2 Analysis of Willis' methodology .....                   | 14        |
| 2.3 Analysis of aminoarylation-derived scaffolds 1a-f ..... | 16        |
| 2.4 Analysis of SnAP-derived scaffolds 3b-j .....           | 19        |
| 2.5 Analysis of azetidine-based Scaffolds 4-11 .....        | 23        |
| 2.6 Analysis of spirocyclic scaffolds 12-13.....            | 29        |
| 2.7 Analysis of oxetane scaffolds 17a-e.....                | 34        |
| 2.7.1 Substructure filters .....                            | 44        |
| <b>3.0 References.....</b>                                  | <b>53</b> |

## 1.0 Data mining analysis

Synthetic methodologies from the first issues of *Angew. Chem. Int Ed.* (23 papers) and *J. Am. Chem. Soc.* (6 papers) in 2016 were assessed. The number of variable (het)aryl groups were considered for methodologies where (het)aryls were incorporated (and close to the site of reaction) in the key bond-forming step(s) of the methodology. The full study is shown in Table S1. The results are summarized in Table S2.

| entry | Ref.                                   | figure/<br>scheme/<br>table | no.<br>(het)aryl<br>examples | no.<br>hetaryl<br>exampl<br>es | hetaryl<br>identity                                                   | no.<br>aryl<br>exampl<br>es | substitution patterns of phenyl substituents |          |          |          | Unfunctional-<br>izable hetaryls | Functional-<br>izable<br>hetaryls | functionalizable<br>hetaryl identity | Unfunctional-<br>izable aryls | Functional<br>-izable<br>aryl<br>s | functionalizable<br>aryl identity                                         | total<br>unfunctional-<br>izable | total<br>functional-<br>izable |
|-------|----------------------------------------|-----------------------------|------------------------------|--------------------------------|-----------------------------------------------------------------------|-----------------------------|----------------------------------------------|----------|----------|----------|----------------------------------|-----------------------------------|--------------------------------------|-------------------------------|------------------------------------|---------------------------------------------------------------------------|----------------------------------|--------------------------------|
|       |                                        |                             |                              |                                |                                                                       |                             | unsubstit<br>uted                            | o-       | m-       | p-       |                                  |                                   |                                      |                               |                                    |                                                                           |                                  |                                |
| 1     | 2016ACI<br>E218; S.<br>Chang           | Table 2,<br>R1              | 5                            | 0                              |                                                                       | 5                           | 1                                            | 0        | 0        | 4        | 0                                |                                   | 0                                    | 0                             |                                    | p-Cl, p-Br, p-<br>OTIPS                                                   | 2                                | 3                              |
|       | DOI:<br>10.1002/a<br>nie.20150<br>8669 | Table 3,<br>R1              | 5                            | 0                              |                                                                       | 5                           | 1                                            | 0        | 3        | 1        | 0                                |                                   | 0                                    | 0                             |                                    | m-Cl, m-Br, m-<br>OTIPS                                                   | 2                                | 3                              |
|       |                                        | Table 4                     | 1                            | 0                              |                                                                       | 1                           | 0                                            | 0        | 0        | 0        | 1                                |                                   | 0                                    | 0                             |                                    |                                                                           | 1                                | 0                              |
|       |                                        | <b>SUM</b>                  |                              | <b>11</b>                      | <b>0</b>                                                              |                             | <b>11</b>                                    | <b>2</b> | <b>0</b> | <b>3</b> | <b>5</b>                         | <b>1</b>                          |                                      | <b>0</b>                      | <b>0</b>                           |                                                                           | <b>5</b>                         | <b>6</b>                       |
| 2     | 2016ACI<br>E232; A.<br>B. Smith        | Table 2                     | 3                            | 2                              | 2-<br>pyridyl,<br>2-<br>thiophe<br>nyl                                | 1                           | 1                                            | 0        | 0        | 0        | 0                                |                                   | 2                                    | 0                             |                                    |                                                                           | 3                                | 0                              |
|       | DOI:<br>10.1002/a<br>nie.20150<br>9342 | <b>SUM</b>                  | <b>3</b>                     | <b>2</b>                       |                                                                       | <b>1</b>                    | <b>1</b>                                     | <b>0</b> | <b>0</b> | <b>0</b> | <b>0</b>                         |                                   | <b>2</b>                             | <b>0</b>                      |                                    |                                                                           | <b>3</b>                         | <b>0</b>                       |
| 3     | 2016ACI<br>E237; Z-<br>Q. Liu          | Table 2, R                  | 16                           | 3                              | 2-furyl,<br>3-<br>benzofu<br>ryl,<br>2-<br>thiophe<br>nyl             | 13                          | 1                                            | 2        | 2        | 5        | 3                                |                                   | 3                                    | 0                             |                                    | p-Cl, p-Br                                                                | 14                               | 2                              |
|       | DOI:<br>10.1002/a<br>nie.20150<br>9537 | Table 3, R                  | 5                            | 0                              |                                                                       | 5                           | 1                                            | 0        | 0        | 4        | 0                                |                                   | 0                                    | 0                             |                                    | p-Cl                                                                      | 4                                | 1                              |
|       |                                        | <b>SUM</b>                  |                              | <b>21</b>                      | <b>3</b>                                                              |                             | <b>18</b>                                    | <b>2</b> | <b>2</b> | <b>2</b> | <b>9</b>                         | <b>3</b>                          |                                      | <b>3</b>                      | <b>0</b>                           |                                                                           | <b>18</b>                        | <b>3</b>                       |
| 4     | 2016ACI<br>E254, G.<br>A.<br>Molander  | Scheme 3                    | 11                           | 3                              | 2-<br>benzoth<br>iophenyl<br>,<br>coumeri<br>n-yl,<br>5-pyrimi<br>dyl | 8                           | 0                                            | 0        | 1        | 7        | 0                                |                                   | 2                                    | 1                             | CN (on<br>coumarin)                | p-CN, p-(NHAc),<br>p-CO2Me,<br>p-CHO,<br>m-(COMe),<br>p-(SO2NH2),<br>p-OH | 3                                | 8                              |

|   |                                        |                      |           |          |                                                             |           |          |           |          |           |          |          |          |                                                  |           |           |                                                                                        |           |           |
|---|----------------------------------------|----------------------|-----------|----------|-------------------------------------------------------------|-----------|----------|-----------|----------|-----------|----------|----------|----------|--------------------------------------------------|-----------|-----------|----------------------------------------------------------------------------------------|-----------|-----------|
|   | DOI:<br>10.1002/a<br>nie.20150<br>6147 | Scheme 4<br>and 5    | 13        | 3        | 2-<br>thiophe<br>nyl,<br>2-imida<br>zyl,<br>2-pyrimi<br>dyl | 10        | 0        | 0         | 5        | 5         | 0        | 2        | 1        | 4-thiophenyl-<br>SO <sub>2</sub> NH <sub>2</sub> | 4         | 6         | m-(COCH <sub>3</sub> ),<br>p-CN,<br>m-CN,<br>p-(Bpin), m-OH,<br>m-B(OH) <sub>2</sub> , | 6         | 7         |
|   |                                        | <b>SUM</b>           | <b>24</b> | <b>6</b> |                                                             | <b>18</b> | <b>0</b> | <b>0</b>  | <b>6</b> | <b>12</b> | <b>0</b> | <b>4</b> | <b>2</b> |                                                  | <b>5</b>  | <b>13</b> |                                                                                        | <b>9</b>  | <b>15</b> |
| 5 | 2016ACI<br>E264, L.<br>Ackerma<br>nn   | Scheme 1             | 11        | 0        |                                                             | 11        | 1        | 5         | 2        | 3         | 0        | 0        | 0        |                                                  | 9         | 2         | o-Cl, o-NO <sub>2</sub>                                                                | 9         | 2         |
|   | DOI:<br>10.1002/a<br>nie.20150<br>7801 | Scheme 2             | 10        | 0        |                                                             | 10        | 0        | 3         | 1        | 3         | 3        | 0        | 0        |                                                  | 9         | 1         | p-Cl                                                                                   | 9         | 1         |
|   |                                        | Scheme 3             | 7         | 0        |                                                             | 7         | 1        | 3         | 1        | 0         | 2        | 0        | 0        |                                                  | 5         | 2         | [p-Br,o-Me], o-I                                                                       | 5         | 2         |
|   |                                        | <b>SUM</b>           | <b>28</b> | <b>0</b> |                                                             | <b>28</b> | <b>2</b> | <b>11</b> | <b>4</b> | <b>6</b>  | <b>5</b> | <b>0</b> | <b>0</b> |                                                  | <b>23</b> | <b>5</b>  |                                                                                        | <b>23</b> | <b>5</b>  |
| 6 | 2016ACI<br>E268, A.<br>T. Biju         | Scheme 1,<br>R       | 11        | 1        | 2-furyl                                                     | 10        | 1        | 1         | 1        | 6         | 1        | 1        | 0        |                                                  | 7         | 3         | p-Cl, p-NO <sub>2</sub> ,<br>m-Br                                                      | 8         | 3         |
|   | DOI:<br>10.1002/a<br>nie.20150<br>7802 | Scheme 2,<br>R1      | 7         | 0        |                                                             | 7         | 1        | 1         | 0        | 5         | 0        | 0        | 0        |                                                  | 5         | 2         | p-Br, p-NO <sub>2</sub>                                                                | 5         | 2         |
|   |                                        | Scheme 2,<br>R2      | 5         | 0        |                                                             | 5         | 1        | 0         | 0        | 4         | 0        | 0        | 0        |                                                  | 4         | 1         | p-Br                                                                                   | 4         | 1         |
|   |                                        | <b>SUM</b>           | <b>23</b> | <b>1</b> |                                                             | <b>22</b> | <b>3</b> | <b>2</b>  | <b>1</b> | <b>15</b> | <b>1</b> | <b>1</b> | <b>0</b> |                                                  | <b>16</b> | <b>6</b>  |                                                                                        | <b>17</b> | <b>6</b>  |
| 7 | 2016ACI<br>E273, J.<br>Wang            | Scheme 2,<br>Ar1/Ar2 | 9         | 0        |                                                             | 9         | 1        | 2         | 1        | 5         | 0        | 0        | 0        |                                                  | 8         | 1         | p-Cl                                                                                   | 8         | 1         |
|   | DOI:<br>10.1002/a<br>nie.20150<br>9711 | Scheme 3,<br>R       | 5         | 0        |                                                             | 5         | 1        | 0         | 0        | 3         | 1        | 0        | 0        |                                                  | 4         | 1         | p-Cl                                                                                   | 4         | 1         |
|   |                                        | Scheme 4,<br>Ar      | 4         | 0        |                                                             | 4         | 0        | 0         | 1        | 2         | 1        | 0        | 0        |                                                  | 3         | 1         | [o-Br,p-Cl]                                                                            | 3         | 1         |
|   |                                        | <b>SUM</b>           | <b>18</b> | <b>0</b> |                                                             | <b>18</b> | <b>2</b> | <b>2</b>  | <b>2</b> | <b>10</b> | <b>2</b> | <b>0</b> | <b>0</b> |                                                  | <b>15</b> | <b>3</b>  |                                                                                        | <b>15</b> | <b>3</b>  |
| 8 | 2016ACI<br>E278, T.<br>Shishido        | Table 2 Ar           | 9         | 0        |                                                             | 9         | 1        | 0         | 1        | 4         | 3        | 0        | 0        |                                                  | 9         | 0         |                                                                                        | 9         | 0         |
|   | DOI:                                   | Table 2              | 5         | 1        | 3-                                                          | 4         | 1        | 0         | 0        | 2         | 1        | 1        | 0        |                                                  | 4         | 0         |                                                                                        | 5         | 0         |

|    |                                        |                                  |           |           |                                    |           |          |          |          |           |          |           |          |                                                                                      |           |           |                                                                                   |           |           |
|----|----------------------------------------|----------------------------------|-----------|-----------|------------------------------------|-----------|----------|----------|----------|-----------|----------|-----------|----------|--------------------------------------------------------------------------------------|-----------|-----------|-----------------------------------------------------------------------------------|-----------|-----------|
|    | 10.1002/a<br>nie.20150<br>7814         | R/R'                             |           | 1         | thiophe<br>nyl                     | 13        | 2        | 0        | 1        | 6         | 4        | 1         | 0        |                                                                                      | 13        | 0         |                                                                                   | 14        | 0         |
|    |                                        | <b>SUM</b>                       | <b>14</b> | <b>1</b>  |                                    | <b>13</b> | <b>2</b> | <b>0</b> | <b>1</b> | <b>6</b>  | <b>4</b> | <b>1</b>  | <b>0</b> |                                                                                      | <b>13</b> | <b>0</b>  |                                                                                   | <b>14</b> | <b>0</b>  |
| 9  | 2016ACI<br>E307, G-<br>J. Deng         | Table 1, R                       | 22        | 2         | 2-furyl,<br>2-<br>thiophe<br>nyl   | 20        | 1        | 2        | 5        | 10        | 2        | 2         | 0        |                                                                                      | 10        | 10        | p-Cl, p-Br, p-I, p-<br>NO2, m-Cl, m-<br>Br, m-NO2,<br>o-Cl, o-NO2,<br>[m-Cl,p-Cl] | 12        | 10        |
|    | DOI:<br>10.1002/a<br>nie.20150<br>8076 | Scheme 2,<br>R1                  | 5         | 5         | indolyl                            | 0         | 0        | 0        | 0        | 0         | 0        | 3         | 2        | 6-Cl, 6-Br                                                                           | 0         | 0         |                                                                                   | 3         | 2         |
|    |                                        | Scheme 2,<br>R2                  | 11        | 2         | 2-<br>thiophe<br>nyl,<br>2-indolyl | 9         | 1        | 1        | 3        | 4         | 0        | 2         | 0        |                                                                                      | 6         | 3         | p-Br, m-Cl, o-Cl                                                                  | 8         | 3         |
|    |                                        | <b>SUM</b>                       | <b>38</b> | <b>9</b>  |                                    | <b>29</b> | <b>2</b> | <b>3</b> | <b>8</b> | <b>14</b> | <b>2</b> | <b>7</b>  | <b>2</b> |                                                                                      | <b>16</b> | <b>13</b> |                                                                                   | <b>23</b> | <b>15</b> |
| 10 | 2016ACI<br>E317, A.<br>J.<br>Grenning  | Scheme 2                         | 1         | 0         |                                    | 1         | 0        | 0        | 0        | 1         | 0        | 0         | 0        |                                                                                      | 1         | 0         |                                                                                   | 1         | 0         |
|    | DOI:<br>10.1002/a<br>nie.20150<br>8100 | Scheme 3                         | 3         | 0         |                                    | 3         | 0        | 0        | 0        | 1         | 2        | 0         | 0        |                                                                                      | 2         | 1         | p-Cl                                                                              | 2         | 1         |
|    |                                        | Scheme 6                         | 10        | 0         |                                    | 10        | 0        | 2        | 2        | 3         | 3        | 0         | 0        |                                                                                      | 8         | 2         | o-Cl, p-Cl                                                                        | 8         | 2         |
|    |                                        | <b>SUM</b>                       | <b>14</b> | <b>0</b>  |                                    | <b>14</b> | <b>0</b> | <b>2</b> | <b>2</b> | <b>5</b>  | <b>5</b> | <b>0</b>  | <b>0</b> |                                                                                      | <b>11</b> | <b>3</b>  |                                                                                   | <b>11</b> | <b>3</b>  |
| 11 | 2016ACI<br>E321, D.<br>Ma              | Scheme 2,<br>indole<br>component | 21        | 21        | indolyl                            | 0         | 0        | 0        | 0        | 0         | 0        | 14        | 7        | [protected OH:<br>5-OBn or 5-<br>OCOtBu], 5-Br,<br>5-Cl, 5-CN, 6-<br>OBn, 6-Br, 6-Cl | 0         | 0         |                                                                                   | 14        | 7         |
|    | DOI:<br>10.1002/a<br>nie.20150<br>8117 | <b>SUM</b>                       | <b>21</b> | <b>21</b> | <b>indolyl</b>                     | <b>0</b>  | <b>0</b> | <b>0</b> | <b>0</b> | <b>0</b>  | <b>0</b> | <b>14</b> | <b>7</b> |                                                                                      | <b>0</b>  | <b>0</b>  |                                                                                   | <b>14</b> | <b>7</b>  |
| 12 | 2016ACI<br>E326, J.<br>T.<br>Reeves    | Table 4                          | 16        | 2         | 3-<br>pyridyl,<br>5-indolyl        | 14        | 1        | 1        | 3        | 7         | 2        | 2         | 0        |                                                                                      | 10        | 4         | p-Cl, p-Br,<br>m-(COCH3),<br>m-CO2Me                                              | 12        | 4         |
|    | DOI:                                   | <b>SUM</b>                       | <b>16</b> | <b>2</b>  | <b>3-</b>                          | <b>14</b> | <b>1</b> | <b>1</b> | <b>3</b> | <b>7</b>  | <b>2</b> | <b>2</b>  | <b>0</b> |                                                                                      | <b>10</b> | <b>4</b>  |                                                                                   | <b>12</b> | <b>4</b>  |

|    |                                        |                    |           |          |                                  |           |          |          |          |           |          |          |          |                                 |           |          |                                           |           |          |
|----|----------------------------------------|--------------------|-----------|----------|----------------------------------|-----------|----------|----------|----------|-----------|----------|----------|----------|---------------------------------|-----------|----------|-------------------------------------------|-----------|----------|
|    | 10.1002/a<br>nie.20150<br>8122         |                    |           |          | pyridyl,<br>5-<br>indolyl        |           |          |          |          |           |          |          |          |                                 |           |          |                                           |           |          |
| 13 | 2016ACI<br>E331, H.<br>Yan             | Table 2,<br>R1     | 11        | 2        | 2-furyl,<br>3-<br>thiophe<br>nyl | 9         | 1        | 1        | 0        | 5         | 2        | 2        | 0        |                                 | 8         | 1        | p-Cl                                      | 10        | 1        |
|    | DOI:<br>10.1002/a<br>nie.20150<br>8127 | Table 3,<br>R3     | 4         | 1        | 3-<br>thiophe<br>nyl             | 3         | 0        | 0        | 0        | 3         | 0        | 0        | 1        | 2,4,-<br>dichlorothiophen<br>yl | 2         | 1        | p-Cl                                      | 2         | 2        |
|    |                                        | <b>SUM</b>         | <b>15</b> | <b>3</b> |                                  | <b>12</b> | <b>1</b> | <b>1</b> | <b>0</b> | <b>8</b>  | <b>2</b> | <b>2</b> | <b>1</b> |                                 | <b>10</b> | <b>2</b> |                                           | <b>12</b> | <b>3</b> |
| 14 | 2016ACI<br>E336, N.<br>Yoshikai        | Scheme 1,<br>R1    | 1         | 0        |                                  | 1         | 1        | 0        | 0        | 0         | 0        | 0        | 0        |                                 | 1         | 0        |                                           | 1         | 0        |
|    | DOI:<br>10.1002/a<br>nie.20150<br>8262 | Scheme 1,<br>R2    | 6         | 0        |                                  | 6         | 1        | 0        | 1        | 4         | 0        | 0        | 0        |                                 | 5         | 1        | p-TMS                                     | 5         | 1        |
|    |                                        | Scheme 2,<br>R1/R2 | 7         | 1        | 2-<br>thiophe<br>nyl             | 6         | 1        | 1        | 1        | 3         | 0        | 1        | 0        |                                 | 5         | 1        | p-Cl                                      | 6         | 1        |
|    |                                        | <b>SUM</b>         | <b>14</b> | <b>1</b> |                                  | <b>13</b> | <b>3</b> | <b>1</b> | <b>2</b> | <b>7</b>  | <b>0</b> | <b>1</b> | <b>0</b> |                                 | <b>11</b> | <b>2</b> |                                           | <b>12</b> | <b>2</b> |
| 15 | 2016ACI<br>E341, S.<br>Ogoshi          | Table 1,<br>R1     | 6         | 0        |                                  | 6         | 1        | 0        | 0        | 4         | 1        | 0        | 0        |                                 | 5         | 1        | p-Cl                                      | 5         | 1        |
|    | DOI:<br>10.1002/a<br>nie.20150<br>8266 | Table 1,<br>R2     | 13        | 1        | 2-<br>thiophe<br>nyl             | 12        | 0        | 0        | 0        | 8         | 4        | 1        | 0        |                                 | 8         | 4        | p-CO2Me, p-Br,<br>p-(Bpin),<br>p-CH(OEt)2 | 9         | 4        |
|    |                                        | <b>SUM</b>         | <b>19</b> | <b>1</b> |                                  | <b>18</b> | <b>1</b> | <b>0</b> | <b>0</b> | <b>12</b> | <b>5</b> | <b>1</b> | <b>0</b> |                                 | <b>13</b> | <b>5</b> |                                           | <b>14</b> | <b>5</b> |
| 16 | 2016ACI<br>E345, Y.<br>Yang            | Table 1            | 1         | 0        |                                  | 1         | 0        | 0        | 0        | 0         | 1        | 0        | 0        |                                 | 1         | 0        |                                           | 1         | 0        |
|    |                                        | Scheme 2           | 4         | 0        |                                  | 4         | 0        | 0        | 0        | 0         | 4        | 0        | 0        |                                 | 4         | 0        |                                           | 4         | 0        |
|    | DOI:<br>10.1002/a<br>nie.20150<br>8294 | Scheme 3,<br>R2    | 4         | 0        |                                  | 4         | 1        | 0        | 1        | 0         | 2        | 0        | 0        |                                 | 4         | 0        |                                           | 4         | 0        |
|    |                                        | <b>SUM</b>         | <b>9</b>  | <b>0</b> |                                  | <b>9</b>  | <b>1</b> | <b>0</b> | <b>1</b> | <b>0</b>  | <b>7</b> | <b>0</b> | <b>0</b> |                                 | <b>9</b>  | <b>0</b> |                                           | <b>9</b>  | <b>0</b> |
| 17 | 2016ACI<br>E350, N.                    | Table 2, Ar        | 8         | 0        |                                  | 8         | 1        | 0        | 2        | 5         | 0        | 0        | 0        |                                 | 6         | 2        | p-Cl, p-Br                                | 6         | 2        |

|    |                                        |                    |           |          |                      |          |          |          |           |          |          |          |   |           |            |             |           |          |  |
|----|----------------------------------------|--------------------|-----------|----------|----------------------|----------|----------|----------|-----------|----------|----------|----------|---|-----------|------------|-------------|-----------|----------|--|
|    | Jiao                                   |                    |           |          |                      |          |          |          |           |          |          |          |   |           |            |             |           |          |  |
|    | DOI:<br>10.1002/a<br>nie.20150<br>8347 | Table 3, R         | 9         | 0        | 9                    | 1        | 1        | 2        | 4         | 1        | 0        | 0        |   | 7         | 2          | p-Cl, p-Br  | 7         | 2        |  |
|    |                                        | Table 4, Ar        | 7         | 0        | 7                    | 1        | 0        | 2        | 4         | 0        | 0        | 0        |   | 5         | 2          | p-Cl, p-Br  | 5         | 2        |  |
|    |                                        | <b>SUM</b>         | <b>24</b> | <b>0</b> | <b>24</b>            | <b>3</b> | <b>1</b> | <b>6</b> | <b>13</b> | <b>1</b> | <b>0</b> | <b>0</b> |   | <b>18</b> | <b>6</b>   |             | <b>18</b> | <b>6</b> |  |
| 18 | 2016ACI<br>E359, N.<br>Shibata         | Table 2            | 8         | 0        | 8                    | 1        | 1        | 1        | 4         | 1        | 0        | 0        |   | 6         | 2          | p-Br, p-NO2 | 6         | 2        |  |
|    | DOI:<br>10.1002/a<br>nie.20150<br>8574 | <b>SUM</b>         | <b>8</b>  | <b>0</b> | <b>8</b>             | <b>1</b> | <b>1</b> | <b>1</b> | <b>4</b>  | <b>1</b> | <b>0</b> | <b>0</b> |   | <b>6</b>  | <b>2</b>   |             | <b>6</b>  | <b>2</b> |  |
| 19 | 2016ACI<br>E373, P.<br>N. Liu          | Scheme 2,<br>R1    | 8         | 0        | 8                    | 1        | 0        | 1        | 5         | 1        | 0        | 0        |   | 7         | 1          | p-Cl        | 7         | 1        |  |
|    | DOI:<br>10.1002/a<br>nie.20150<br>8914 | Scheme 2,<br>R2/R3 | 9         | 0        | 9                    | 1        | 0        | 2        | 6         | 0        | 0        | 0        |   | 7         | 2          | p-Cl, m-Cl  | 7         | 2        |  |
|    |                                        | Scheme 3,<br>R1    | 8         | 1        | 3-<br>thiophe<br>nyl | 7        | 1        | 0        | 1         | 5        | 0        | 1        | 0 | 6         | 1          | p-Cl        | 7         | 1        |  |
|    |                                        | Scheme 3,<br>R2/R3 | 9         | 0        |                      | 9        | 1        | 0        | 2         | 6        | 0        | 0        | 7 | 2         | p-Cl, m-Cl | 7           | 2         |          |  |
|    |                                        | <b>SUM</b>         | <b>34</b> | <b>1</b> | <b>33</b>            | <b>4</b> | <b>0</b> | <b>6</b> | <b>22</b> | <b>1</b> | <b>1</b> | <b>0</b> |   | <b>27</b> | <b>6</b>   |             | <b>28</b> | <b>6</b> |  |
| 20 | 2016ACI<br>E387, M.<br>Beller          | Table 1            | 2         | 0        | 2                    | 0        | 0        | 0        | 0         | 2        | 0        | 0        |   | 2         | 0          |             | 2         | 0        |  |
|    | DOI:<br>10.1002/a<br>nie.20150<br>8575 | Table 1, R'        | 2         | 0        | 2                    | 1        | 0        | 0        | 1         | 0        | 0        | 0        |   | 1         | 1          | p-Cl        | 1         | 1        |  |
|    |                                        | Scheme 2,<br>R     | 7         | 0        | 7                    | 0        | 0        | 0        | 0         | 7        | 0        | 0        |   | 5         | 2          | 5-Br, 5-NH2 | 5         | 2        |  |
|    |                                        | Scheme 4,<br>R     | 1         | 0        | 1                    | 1        | 0        | 0        | 0         | 0        | 0        | 0        |   | 1         | 0          |             | 1         | 0        |  |
|    |                                        | Scheme 5           | 1         | 0        | 1                    | 0        | 0        | 0        | 0         | 1        | 0        | 0        |   | 1         | 0          |             | 1         | 0        |  |
|    |                                        | Scheme 6           | 1         | 0        | 1                    | 0        | 0        | 0        | 0         | 1        | 0        | 0        |   | 1         | 0          |             | 1         | 0        |  |
|    |                                        | Scheme 6,<br>R"    | 2         | 0        | 2                    | 1        | 1        | 0        | 0         | 0        | 0        | 0        |   | 2         | 0          |             | 2         | 0        |  |



|    |                             |              | SUM | 16        | 0        | 16        | 3        | 1        | 0        | 1         | 11       | 0        | 0        |  | 13        | 3        |                                                                                             | 13        | 3        |
|----|-----------------------------|--------------|-----|-----------|----------|-----------|----------|----------|----------|-----------|----------|----------|----------|--|-----------|----------|---------------------------------------------------------------------------------------------|-----------|----------|
| 21 | 2016ACI E404, P. Knochel    | Scheme 3     |     | 1         | 0        | 1         | 0        | 0        | 1        | 0         | 0        | 0        | 0        |  | 1         | 0        |                                                                                             | 1         | 0        |
|    | DOI: 10.1002/anie.201508719 | Table 1      |     | 4         | 0        | 4         | 0        | 0        | 3        | 0         | 1        | 0        | 0        |  | 2         | 2        | m-CN, [o-Cl,p-Cl]                                                                           | 2         | 2        |
|    |                             | Scheme 4     |     | 1         | 0        | 1         | 0        | 0        | 0        | 0         | 1        | 0        | 0        |  | 0         | 1        | [o-Ph,p-Br]                                                                                 | 0         | 1        |
|    |                             | Scheme 5     |     | 1         | 0        | 1         | 0        | 0        | 0        | 0         | 1        | 0        | 0        |  | 0         | 1        | [o-Me,p-Br]                                                                                 | 0         | 1        |
|    |                             | Scheme 7     |     | 1         | 0        | 1         | 0        | 0        | 0        | 0         | 1        | 0        | 0        |  | 1         | 0        |                                                                                             | 1         | 0        |
|    |                             | <b>SUM</b>   |     | <b>8</b>  | <b>0</b> | <b>8</b>  | <b>0</b> | <b>0</b> | <b>4</b> | <b>0</b>  | <b>4</b> | <b>0</b> | <b>0</b> |  | <b>4</b>  | <b>4</b> |                                                                                             | <b>4</b>  | <b>4</b> |
| 22 | 2016ACI E413, K. Muniz      | Figure 4     |     | 24        | 0        | 24        | 1        | 3        | 4        | 11        | 5        | 0        | 0        |  | 18        | 6        | o-Cl, o-Br, p-Cl, p-Br, [o-F,p-Br], [o-F,m-Cl]                                              | 18        | 6        |
|    | DOI: 10.1002/anie.201507180 | <b>SUM</b>   |     | <b>24</b> | <b>0</b> | <b>24</b> | <b>1</b> | <b>3</b> | <b>4</b> | <b>11</b> | <b>5</b> | <b>0</b> | <b>0</b> |  | <b>18</b> | <b>6</b> |                                                                                             | <b>18</b> | <b>6</b> |
| 23 | 2016ACI E427, R. Wolf       | Table 1      |     | 23        | 0        | 23        | 6        | 5        | 0        | 12        | 0        | 0        | 0        |  | 16        | 7        | [Et,p-Br], [Me,p-Cl], [Me,p-Br], [CH2OH,p-Cl], [CH2OH,p-Br], [CH2OH,p-NO2], [CH2OH,p-CO2Me] | 16        | 7        |
|    | DOI: 10.1002/anie.201507170 | <b>SUM</b>   |     | <b>23</b> | <b>0</b> | <b>23</b> | <b>6</b> | <b>5</b> | <b>0</b> | <b>12</b> | <b>0</b> | <b>0</b> | <b>0</b> |  | <b>16</b> | <b>7</b> |                                                                                             | <b>16</b> | <b>7</b> |
| 24 | 2016JACS44, M. P. Doyle     | Table 1, R1  |     | 7         | 1        | 2-furyl   | 6        | 1        | 0        | 1         | 3        | 1        | 1        |  | 4         | 2        | p-Cl, m-Cl                                                                                  | 5         | 2        |
|    | DOI: 10.1021/jacs.5b10860   | Table 1, R2  |     | 3         | 0        |           | 3        | 1        | 0        | 1         | 1        | 0        | 0        |  | 1         | 2        | p-CO2Et, m-Br                                                                               | 1         | 2        |
|    |                             | Scheme 2, R1 |     | 3         | 0        |           | 3        | 1        | 0        | 0         | 1        | 1        | 0        |  | 2         | 1        | p-Cl                                                                                        | 2         | 1        |
|    |                             | Scheme 2, R2 |     | 2         | 0        |           | 2        | 1        | 0        | 0         | 1        | 0        | 0        |  | 1         | 1        | p-CO2Et                                                                                     | 1         | 1        |

|    |                               |              |            |           |              |           |          |          |           |          |          |          |          |           |           |                                                                         |           |           |
|----|-------------------------------|--------------|------------|-----------|--------------|-----------|----------|----------|-----------|----------|----------|----------|----------|-----------|-----------|-------------------------------------------------------------------------|-----------|-----------|
|    |                               |              | <b>SUM</b> | <b>15</b> | <b>1</b>     | <b>14</b> | <b>4</b> | <b>0</b> | <b>2</b>  | <b>6</b> | <b>2</b> | <b>1</b> | <b>0</b> | <b>8</b>  | <b>6</b>  |                                                                         | <b>9</b>  | <b>6</b>  |
| 25 | 2016JAC S84, B. Chattopadhyay | Table 2      | 20         | 0         | 20           | 0         | 4        | 4        | 8         | 4        | 0        | 0        | 0        | 14        | 6         | p-Cl, p-CN, p-CO2Et, m-Br, o-Br, o-Bpin                                 | 14        | 6         |
|    | DOI: 10.1021/jacs.5b11683     | Table 5      | 16         | 0         | 16           | 0         | 4        | 5        | 6         | 1        | 0        | 0        | 0        | 7         | 9         | p-Cl, p-CN, (p-OH, p-OBoc, p-OBn), o-Cl, o-Br, o-Bpin, m-Br, m-Cl, m-CN | 7         | 9         |
|    |                               | <b>SUM</b>   | <b>36</b>  | <b>0</b>  | <b>36</b>    | <b>0</b>  | <b>8</b> | <b>9</b> | <b>14</b> | <b>5</b> | <b>0</b> | <b>0</b> | <b>0</b> | <b>21</b> | <b>15</b> |                                                                         | <b>21</b> | <b>15</b> |
| 26 | 2016JAC S112, L. Deng         | Table 2, Ar  | 7          | 1         | 2-thiophenyl | 6         | 1        | 1        | 0         | 4        | 0        | 1        | 0        | 4         | 2         | p-Cl, p-Br                                                              | 5         | 2         |
|    | DOI: 10.1021/jacs.5b12522     | <b>SUM</b>   | <b>7</b>   | <b>1</b>  | <b>6</b>     | <b>1</b>  | <b>1</b> | <b>0</b> | <b>4</b>  | <b>0</b> | <b>1</b> | <b>0</b> | <b>4</b> | <b>2</b>  |           |                                                                         | <b>5</b>  | <b>2</b>  |
| 27 | 2016JAC S265, Y. Lan, Y. Lu   | Table 3, R   | 1          | 0         | 1            | 1         | 0        | 0        | 0         | 0        | 0        | 0        | 0        | 1         | 0         |                                                                         | 1         | 0         |
|    | DOI: 10.1021/jacs.5b10524     | Table 5, Ar  | 3          | 0         | 3            | 1         | 0        | 0        | 0         | 2        | 0        | 0        | 0        | 3         | 0         |                                                                         | 3         | 0         |
|    |                               | <b>SUM</b>   | <b>4</b>   | <b>0</b>  | <b>4</b>     | <b>2</b>  | <b>0</b> | <b>0</b> | <b>0</b>  | <b>2</b> | <b>0</b> | <b>0</b> | <b>0</b> | <b>4</b>  | <b>0</b>  |                                                                         | <b>4</b>  | <b>0</b>  |
| 28 | 2016JAC S369, G. Dong         | Table 3      | 7          | 0         | 7            | 0         | 0        | 0        | 0         | 7        | 0        | 0        | 0        | 5         | 2         | [CO2Me], [Cl]                                                           | 5         | 2         |
|    | DOI: 10.1021/jacs.5b11120     | <b>SUM</b>   | <b>7</b>   | <b>0</b>  | <b>7</b>     | <b>0</b>  | <b>0</b> | <b>0</b> | <b>0</b>  | <b>7</b> | <b>0</b> | <b>0</b> | <b>0</b> | <b>5</b>  | <b>2</b>  |                                                                         | <b>5</b>  | <b>2</b>  |
| 29 | 2016JAC S416, J. Zhou         | Scheme 2, R  | 4          | 0         | 4            | 1         | 0        | 1        | 1         | 1        | 0        | 0        | 0        | 2         | 2         | m-Cl, p-Cl                                                              | 2         | 2         |
|    | DOI: 10.1021/jacs.5b11476     | Scheme 3, R1 | 6          | 1         | 2-thiophenyl | 5         | 1        | 1        | 2         | 1        | 0        | 1        | 0        | 4         | 1         | p-Cl                                                                    | 5         | 1         |

SUM

10

1

9

2

1

3

2

1

1

0

6

3

7

3

Table S1. Data mining study (full).

| entry      | reference                    | no. (het)aryl examples | no. hetaryl examples | no. aryl examples | substitution patterns of phenyl substituents |           |           |            |           | unfunctionalizable hetaryls | functionalizable hetaryls | unfunctionalizable aryls | functionalizable aryls | total unfunctionalizable | total functionalizable |
|------------|------------------------------|------------------------|----------------------|-------------------|----------------------------------------------|-----------|-----------|------------|-----------|-----------------------------|---------------------------|--------------------------|------------------------|--------------------------|------------------------|
|            |                              |                        |                      |                   | unsubstituted                                | o-        | m-        | p-         | complex   |                             |                           |                          |                        |                          |                        |
| 1          | 2016ACIE218; S. Chang        | 11                     | 0                    | 11                | 2                                            | 0         | 3         | 5          | 1         | 0                           | 0                         | 5                        | 6                      | 5                        | 6                      |
| 2          | 2016ACIE232; A. B. Smith     | 3                      | 2                    | 1                 | 1                                            | 0         | 0         | 0          | 0         | 2                           | 0                         | 1                        | 0                      | 3                        | 0                      |
| 3          | 2016ACIE237; Z-Q. Liu        | 21                     | 3                    | 18                | 2                                            | 2         | 2         | 9          | 3         | 3                           | 0                         | 15                       | 3                      | 18                       | 3                      |
| 4          | 2016ACIE254, G. A. Molander  | 24                     | 6                    | 18                | 0                                            | 0         | 6         | 12         | 0         | 4                           | 2                         | 5                        | 13                     | 9                        | 15                     |
| 5          | 2016ACIE264, L. Ackermann    | 28                     | 0                    | 28                | 2                                            | 11        | 4         | 6          | 5         | 0                           | 0                         | 23                       | 5                      | 23                       | 5                      |
| 6          | 2016ACIE268, A. T. Biju      | 23                     | 1                    | 22                | 3                                            | 2         | 1         | 15         | 1         | 1                           | 0                         | 16                       | 6                      | 17                       | 6                      |
| 7          | 2016ACIE273, J. Wang         | 18                     | 0                    | 18                | 2                                            | 2         | 2         | 10         | 2         | 0                           | 0                         | 15                       | 3                      | 15                       | 3                      |
| 8          | 2016ACIE278, T. Shishido     | 14                     | 1                    | 13                | 2                                            | 0         | 1         | 6          | 4         | 1                           | 0                         | 13                       | 0                      | 14                       | 0                      |
| 9          | 2016ACIE307, G-J. Deng       | 38                     | 9                    | 29                | 2                                            | 3         | 8         | 14         | 2         | 7                           | 2                         | 16                       | 13                     | 23                       | 15                     |
| 10         | 2016ACIE317, A. J. Grenning  | 14                     | 0                    | 14                | 0                                            | 2         | 2         | 5          | 5         | 0                           | 0                         | 11                       | 3                      | 11                       | 3                      |
| 11         | 2016ACIE321, D. Ma           | 21                     | 21                   | 0                 | 0                                            | 0         | 0         | 0          | 0         | 14                          | 7                         | 0                        | 0                      | 14                       | 7                      |
| 12         | 2016ACIE326, J. T. Reeves    | 16                     | 2                    | 14                | 1                                            | 1         | 3         | 7          | 2         | 2                           | 0                         | 10                       | 4                      | 12                       | 4                      |
| 13         | 2016ACIE331, H. Yan          | 15                     | 3                    | 12                | 1                                            | 1         | 0         | 8          | 2         | 2                           | 1                         | 10                       | 2                      | 12                       | 3                      |
| 14         | 2016ACIE336, N. Yoshikai     | 14                     | 1                    | 13                | 3                                            | 1         | 2         | 7          | 0         | 1                           | 0                         | 11                       | 2                      | 12                       | 2                      |
| 15         | 2016ACIE341, S. Ogoshi       | 19                     | 1                    | 18                | 1                                            | 0         | 0         | 12         | 5         | 1                           | 0                         | 13                       | 5                      | 14                       | 5                      |
| 16         | 2016ACIE345, Y. Yang         | 9                      | 0                    | 9                 | 1                                            | 0         | 1         | 0          | 7         | 0                           | 0                         | 9                        | 0                      | 9                        | 0                      |
| 17         | 2016ACIE350, N. Jiao         | 24                     | 0                    | 24                | 3                                            | 1         | 6         | 13         | 1         | 0                           | 0                         | 18                       | 6                      | 18                       | 6                      |
| 18         | 2016ACIE359, N. Shibata      | 8                      | 0                    | 8                 | 1                                            | 1         | 1         | 4          | 1         | 0                           | 0                         | 6                        | 2                      | 6                        | 2                      |
| 19         | 2016ACIE373, P. N. Liu       | 34                     | 1                    | 33                | 4                                            | 0         | 6         | 22         | 1         | 1                           | 0                         | 27                       | 6                      | 28                       | 6                      |
| 20         | 2016ACIE387, M. Beller       | 16                     | 0                    | 16                | 3                                            | 1         | 0         | 1          | 11        | 0                           | 0                         | 13                       | 3                      | 13                       | 3                      |
| 21         | 2016ACIE404, P. Knochel      | 8                      | 0                    | 8                 | 0                                            | 0         | 4         | 0          | 4         | 0                           | 0                         | 4                        | 4                      | 4                        | 4                      |
| 22         | 2016ACIE413, K. Muniz        | 24                     | 0                    | 24                | 1                                            | 3         | 4         | 11         | 5         | 0                           | 0                         | 18                       | 6                      | 18                       | 6                      |
| 23         | 2016ACIE427, R. Wolf         | 23                     | 0                    | 23                | 6                                            | 5         | 0         | 12         | 0         | 0                           | 0                         | 16                       | 7                      | 16                       | 7                      |
| 24         | 2016JACS44, M. P. Doyle      | 15                     | 1                    | 14                | 4                                            | 0         | 2         | 6          | 2         | 1                           | 0                         | 8                        | 6                      | 9                        | 6                      |
| 25         | 2016JACS84, B. Chattopadhyay | 36                     | 0                    | 36                | 0                                            | 8         | 9         | 14         | 5         | 0                           | 0                         | 21                       | 15                     | 21                       | 15                     |
| 26         | 2016JACS112, L. Deng         | 7                      | 1                    | 6                 | 1                                            | 1         | 0         | 4          | 0         | 1                           | 0                         | 4                        | 2                      | 5                        | 2                      |
| 27         | 2016JACS265, Y. Lan, Y. Lu   | 4                      | 0                    | 4                 | 2                                            | 0         | 0         | 0          | 2         | 0                           | 0                         | 4                        | 0                      | 4                        | 0                      |
| 28         | 2016JACS369, G. Dong         | 7                      | 0                    | 7                 | 0                                            | 0         | 0         | 0          | 7         | 0                           | 0                         | 5                        | 2                      | 5                        | 2                      |
| 29         | 2016JACS416, J. Zhou         | 10                     | 1                    | 9                 | 2                                            | 1         | 3         | 2          | 1         | 1                           | 0                         | 6                        | 3                      | 7                        | 3                      |
| <b>SUM</b> |                              | <b>504</b>             | <b>54</b>            | <b>450</b>        | <b>50</b>                                    | <b>46</b> | <b>70</b> | <b>205</b> | <b>79</b> | <b>42</b>                   | <b>12</b>                 | <b>323</b>               | <b>127</b>             | <b>365</b>               | <b>139</b>             |

Table S2. Data mining study (summary).

## 2.0 Virtual library enumeration using LLAMA

LLAMA (Lead Likeness And Molecular Analysis, <https://llama.leeds.ac.uk>) is an open-access, web based tool which may be used to decorate and analyse molecular scaffolds. Decoration is performed using a suite of pharmaceutically relevant chemical reactions and reactants to produce a virtual library of final compounds. A list of the reactants used to decorate scaffolds is given in Section 2.1 (Figure S1). Reactions that may be used in LLAMA to decorate scaffolds include: reductive amination, Suzuki coupling, Buchwald-Hartwig amination, sulfonamide formation, urea formation, alcohol alkylation, carbamate formation, secondary amide alkylation, secondary amide arylation, amide formation, alcohol arylation, urea alkylation, urea arylation (see <https://llama.leeds.ac.uk> for full details of these transformations). LLAMA calculates key molecular properties for the virtual compound libraries generated, such as AlogP, molecular weight, no. heavy atoms *etc.* In addition, low energy conformers are determined for each derivative.

For each study detailed in this paper the relevant SDF files were exported from LLAMA after virtual decoration of the scaffolds, Dotmatics Vortex (Vortex v2015.12.46651) was then used to prepare the charts.

## 2.1 LLAMA Standard Capping Groups (LSCGs)

Below are listed the 44 standard capping groups used by LLAMA to decorate scaffolds (Figure S1).

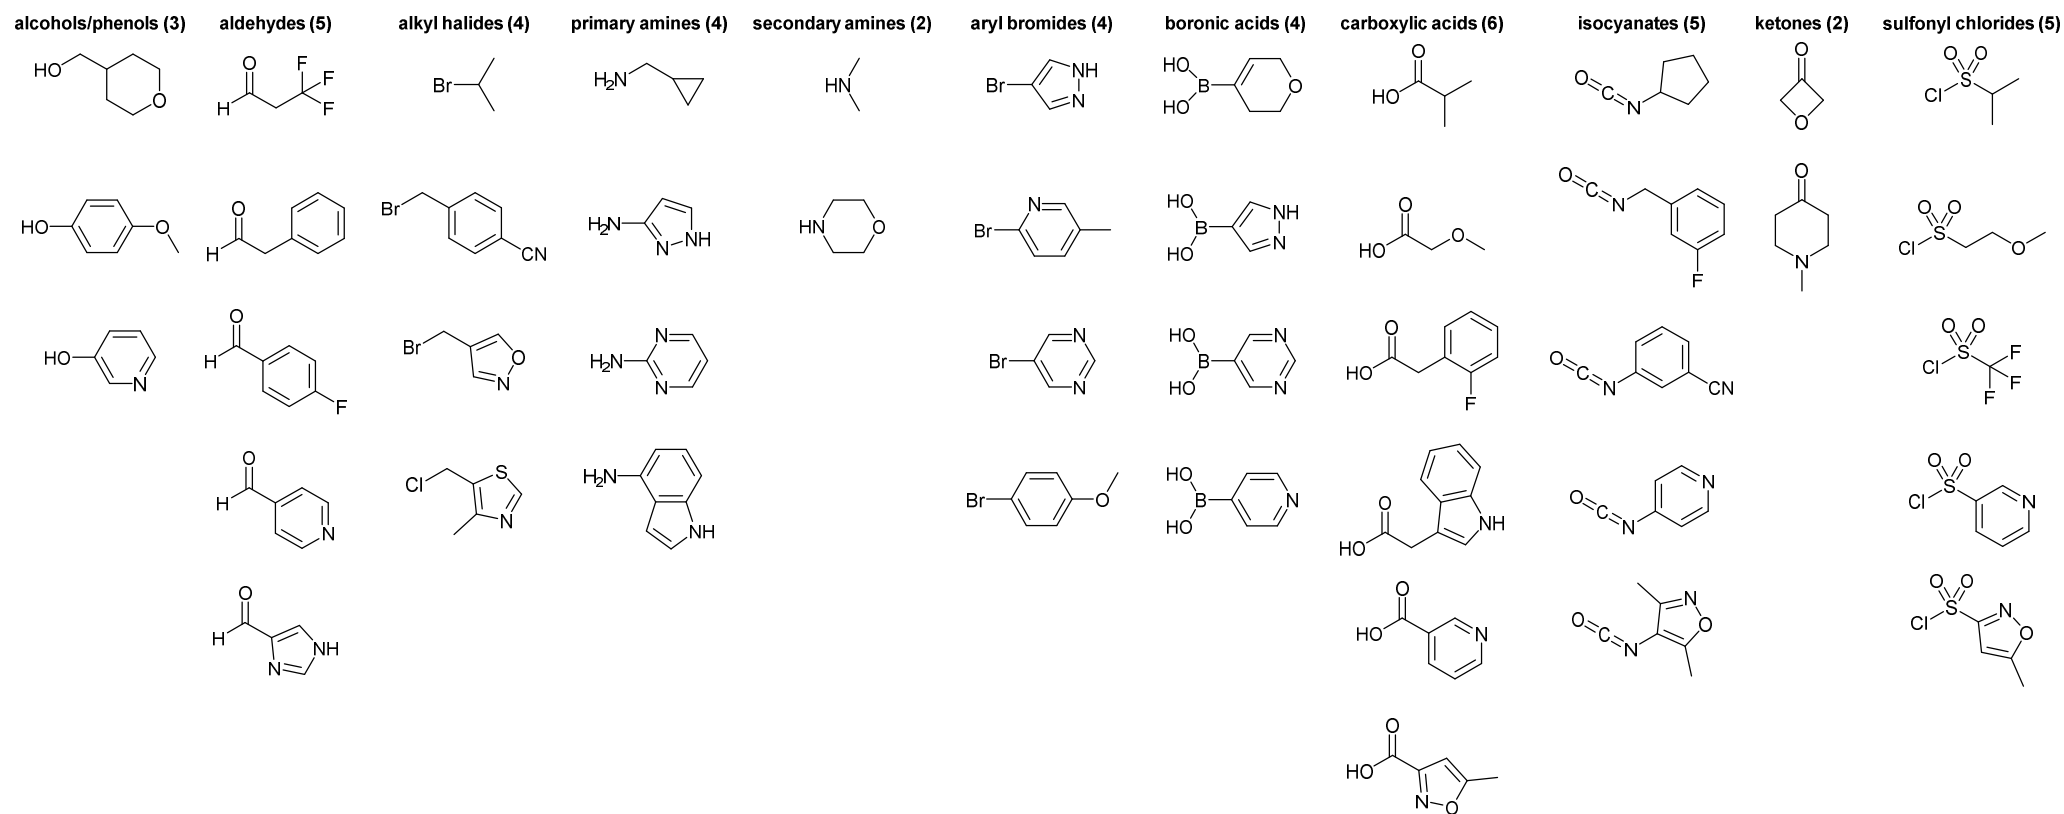

Figure S1. Standard capping reagents exploited by LLAMA for the enumeration of virtual compound libraries.

## 2.2 Analysis of Willis' methodology

As summarized in Figure S2, organometallic reagents (Figure S3) and amines (Figure S4) were subjected to the connective reaction to give sulfonamides. The reagents are known examples that were selected from Willis' paper.<sup>[1]</sup> The molecular properties were assessed using LLAMA (Figure 1 [Manuscript]). A PMI plot of low-lying conformers for each compound is shown in Figure S5.

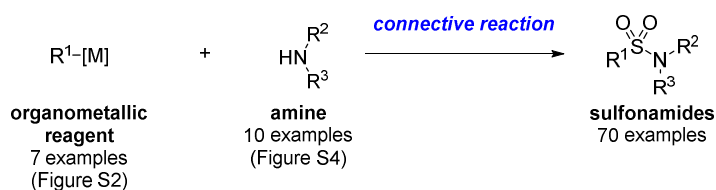

**Figure S2.** An overview of the chemical transformation delivered using Willis' connective reaction.  $[M]$  = Grignard/organolithium/organozinc reagent.

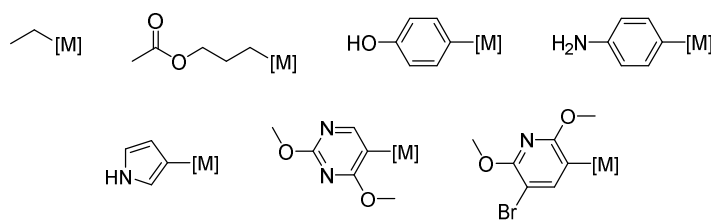

**Figure S3.** Organometallic reagents used in the analysis of Willis' methodology.

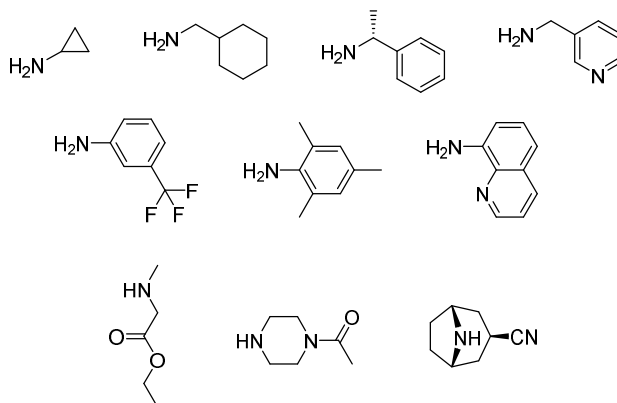

**Figure S4.** Amines used in the analysis of Willis' methodology.

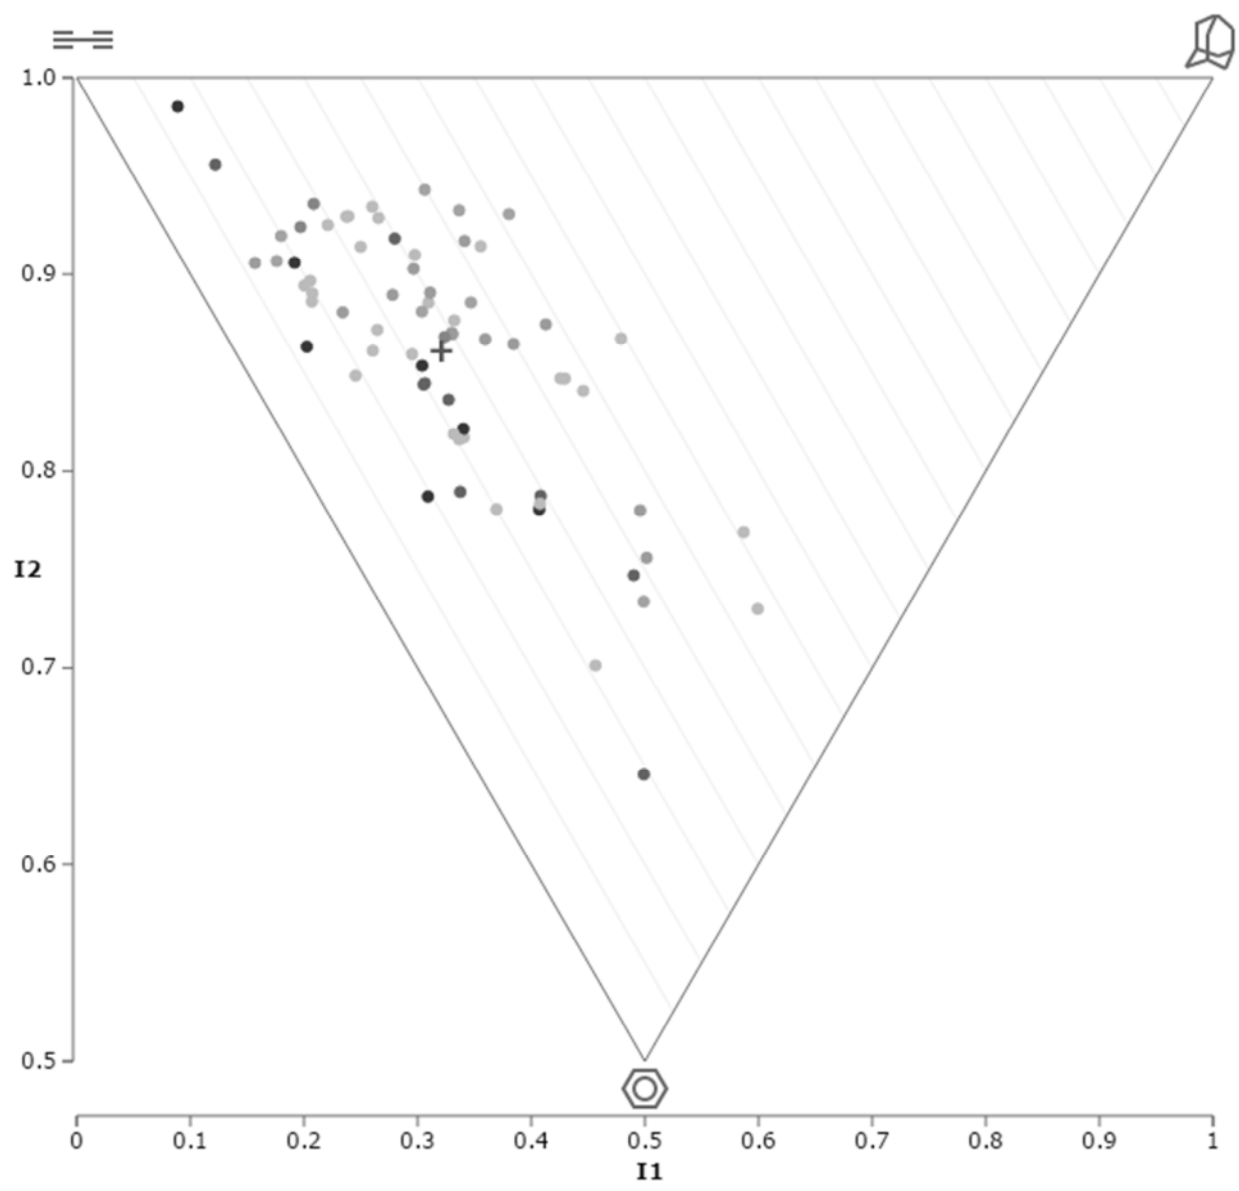

**Figure S5.** A PMI plot of the 70 virtual compounds generated by the process shown in Figure S2 (mean PMI coordinates:  $I1 = 0.321$ ,  $I2 = 0.861$  [denoted by +]).



### 2.3 Analysis of aminoarylation-derived scaffolds 1a-f

As summarized in Figure S6, the Boc-groups from compounds **1a-f** were virtually removed, and the resulting scaffolds **S1a-f** were decorated once using the Standard LLAMA Capping Groups (SLCGs, Figure S1). The following reaction types were enabled in LLAMA: reductive amination, Buchwald-Hartwig amination, sulfonamide formation, urea formation and amide formation. For each scaffold **S1a-f**, the average AlogP and number of heavy atoms of the derivatives were calculated (Table S3; Figure 2 [Manuscript]). Individual molecular property plots (AlogP versus number of Heavy Atoms) for compounds derived from scaffolds **S1a-f** are shown in Figure S7.

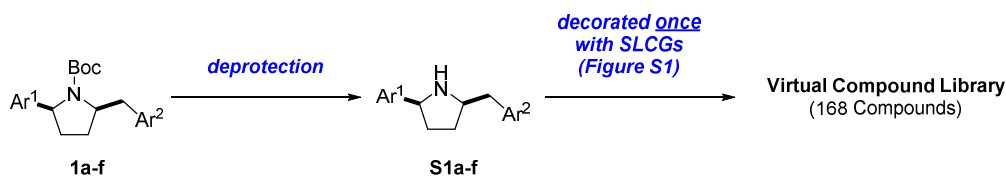

**Figure S6.** An overview of the decoration process for aminoarylation-derived scaffolds **1a-f**.

| Scaffold  | No. Derivatives | $\mu$ AlogP | $\sigma$ AlogP | $\mu$ HA | $\sigma$ HA |
|-----------|-----------------|-------------|----------------|----------|-------------|
| <b>1a</b> | 26              | 3.46        | 0.87           | 25.77    | 1.99        |
| <b>1b</b> | 26              | 4.50        | 0.83           | 25.77    | 1.99        |
| <b>1c</b> | 32              | 3.83        | 0.82           | 28.28    | 2.26        |
| <b>1d</b> | 26              | 4.13        | 0.77           | 29.77    | 1.99        |
| <b>1e</b> | 26              | 1.55        | 0.69           | 25.77    | 1.99        |
| <b>1f</b> | 32              | 2.79        | 0.82           | 28.28    | 2.26        |

**Table S3.** Average molecular properties for the 168 derivative compounds with respect to the parent scaffold (values calculated using Dotmatics Vortex). This information was used to plot Figure 2 (manuscript).

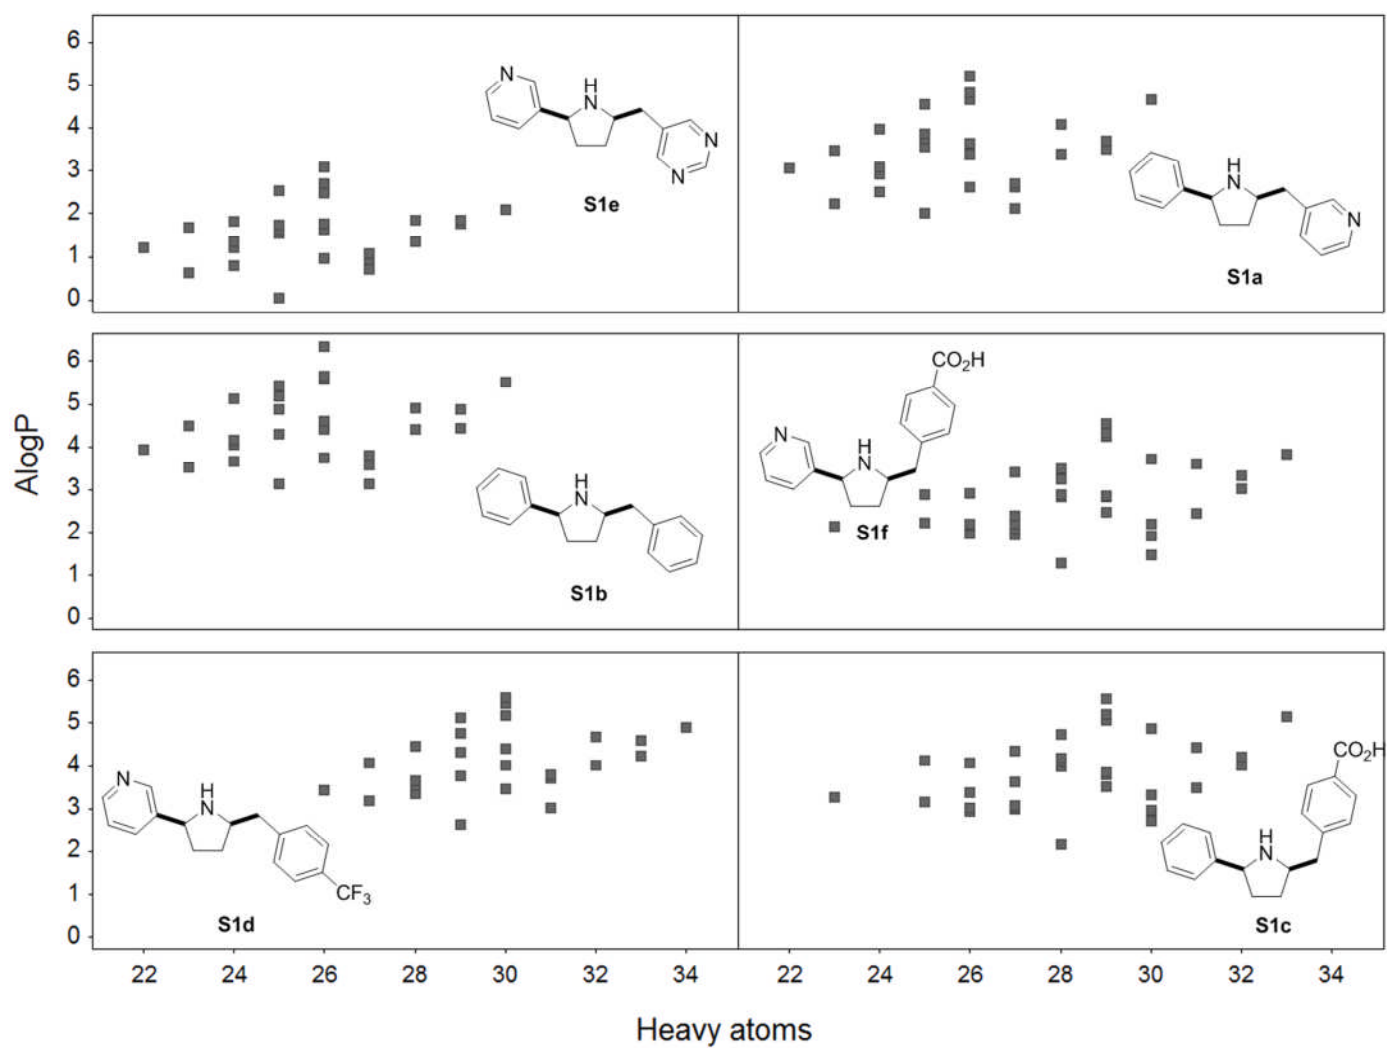

**Figure S7.** Molecular property analyses of the 168 derivatives (generated by the process shown in Figure S6) with respect to the parent scaffolds **S1a-f**.

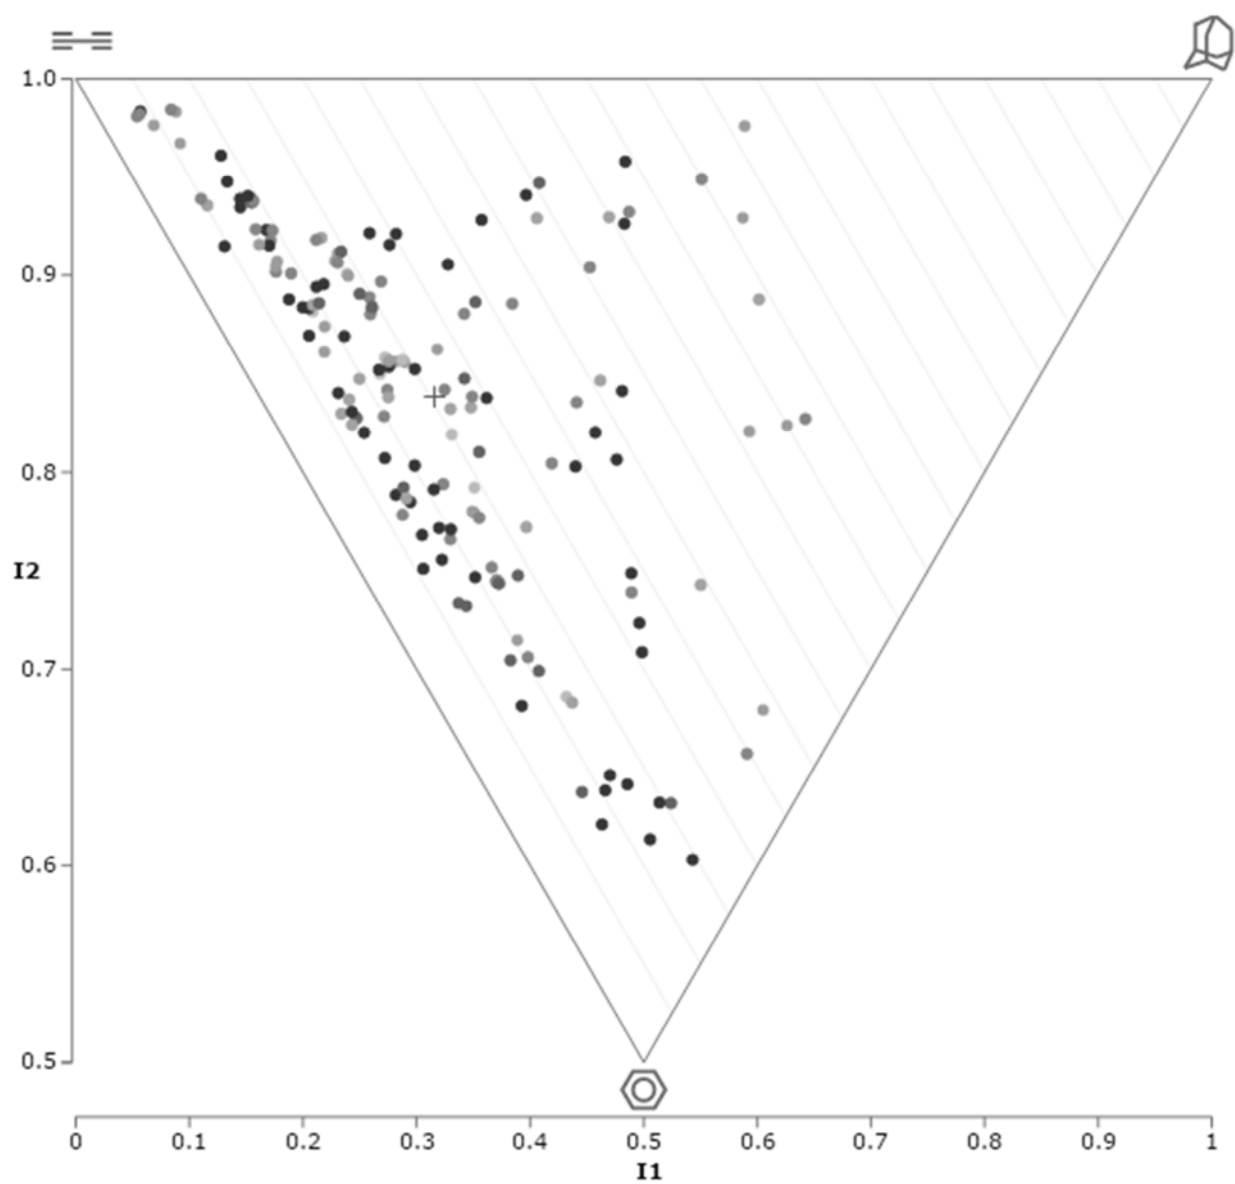

**Figure S8.** A PMI plot of the 168 virtual compounds generated by the process shown in Figure S6 (mean PMI coordinates:  $I1 = 0.316$ ,  $I2 = 0.838$  [denoted by +]).

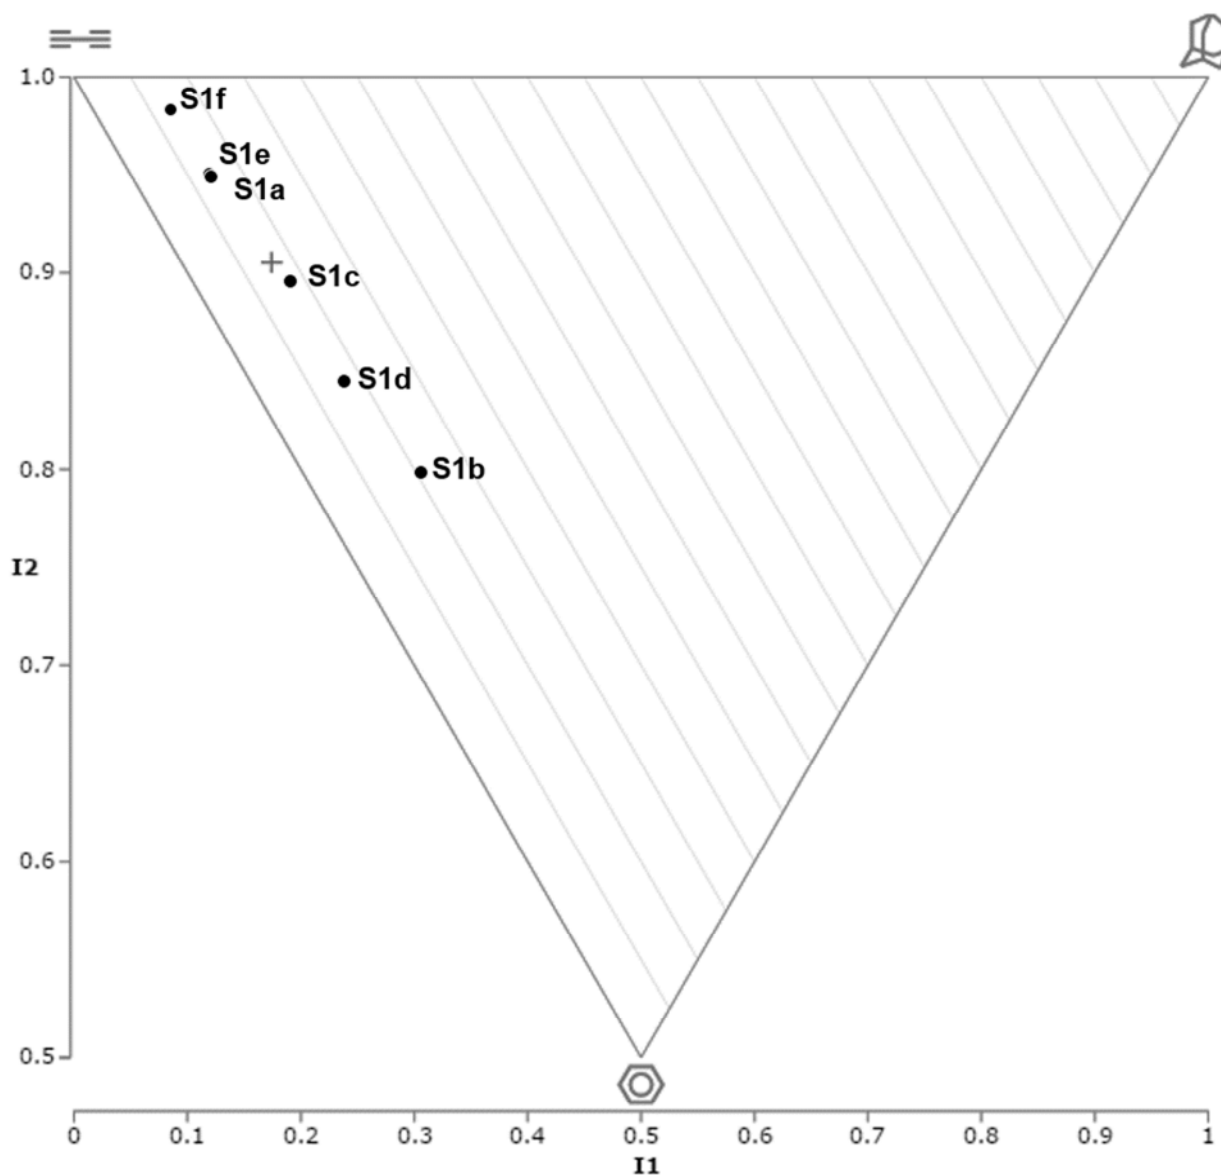

Figure S9 A PMI plot of scaffolds **S1a-f** before decoration (mean PMI coordinates:  $I1 = 0.174$ ,  $I2 = 0.905$  [denoted by +]).

## 2.4 Analysis of SnAP-derived scaffolds **3b-j**

As summarized in Figure S10, any Boc-groups from compounds **3b-j** were virtually removed, and the resulting scaffolds **S3b-f** were decorated once using the Standard LLAMA Capping Groups (SLCGs, Figure S1). The following reaction types were enabled in LLAMA: reductive amination, Suzuki coupling, Buchwald-Hartwig amination, sulfonamide formation, urea formation, alcohol alkylation, carbamate formation, secondary amide alkylation, secondary amide arylation, amide formation, alcohol arylation. For each scaffold **S3b-j** the average AlogP and number of heavy atoms were calculated for the derived compounds (Table S4, Figure 3 [Manuscript]). Individual molecular property plots (AlogP versus number of Heavy Atoms) for compounds derived from scaffolds **S3b-j** are shown in Figure S11. A PMI plot of low-lying conformers for the 409 compounds derived through virtual decoration of scaffolds **S3b-j** is shown in Figure S12.

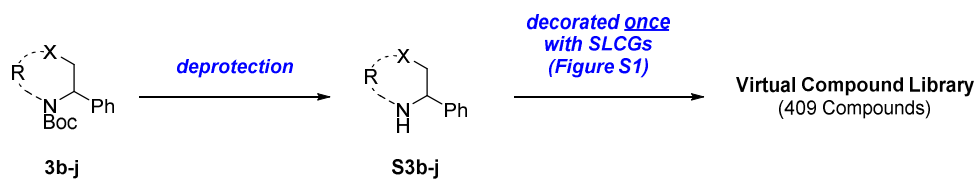

**Figure S10.** An overview of the decoration process for aminoarylation-derived scaffolds **3b-j**.

| Scaffold   | No. Derivatives | $\mu$ AlogP | $\sigma$ AlogP | $\mu$ HA | $\sigma$ HA |
|------------|-----------------|-------------|----------------|----------|-------------|
| <b>S3b</b> | 52              | 1.62        | 0.70           | 19.77    | 1.97        |
| <b>S3c</b> | 26              | 2.38        | 0.79           | 20.77    | 1.99        |
| <b>S3d</b> | 52              | 1.75        | 0.73           | 24.77    | 1.97        |
| <b>S3e</b> | 26              | 3.49        | 0.80           | 24.77    | 1.99        |
| <b>S3f</b> | 52              | 1.44        | 0.69           | 22.77    | 1.97        |
| <b>S3g</b> | 26              | 1.62        | 0.65           | 22.77    | 1.99        |
| <b>S3h</b> | 45              | 3.13        | 0.88           | 24.96    | 1.99        |
| <b>S3i</b> | 52              | 1.90        | 0.71           | 20.77    | 1.97        |
| <b>S3j</b> | 78              | 1.19        | 0.71           | 24.77    | 1.96        |

**Table S4.** Average molecular properties for the 409 derivative compounds generated in Figure S10 with respect to the parent scaffold (values calculated using Dotmatics Vortex).

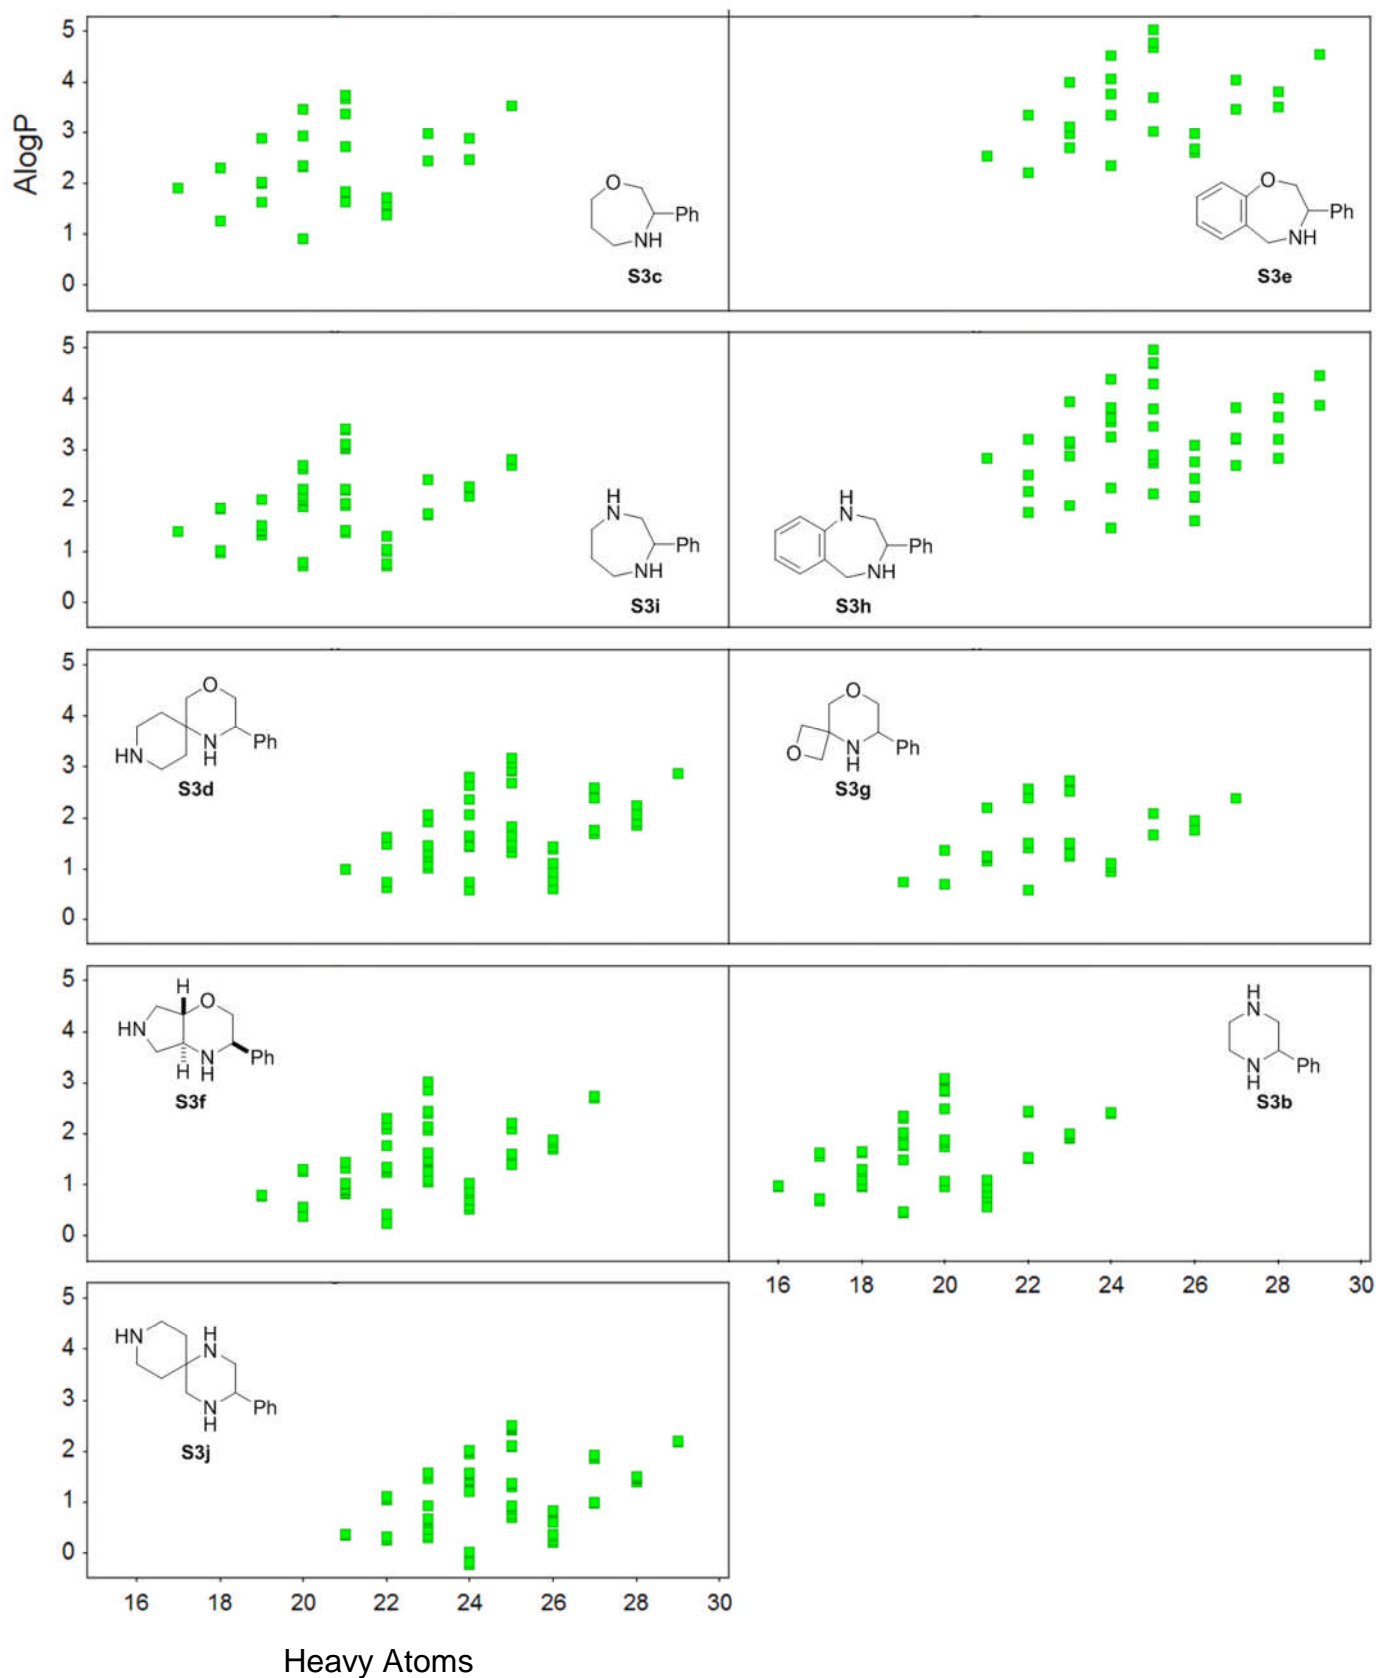

**Figure S11.** Molecular property analyses of the 409 virtual compounds derived through decoration of scaffolds **S3b-j** (Figure S10).

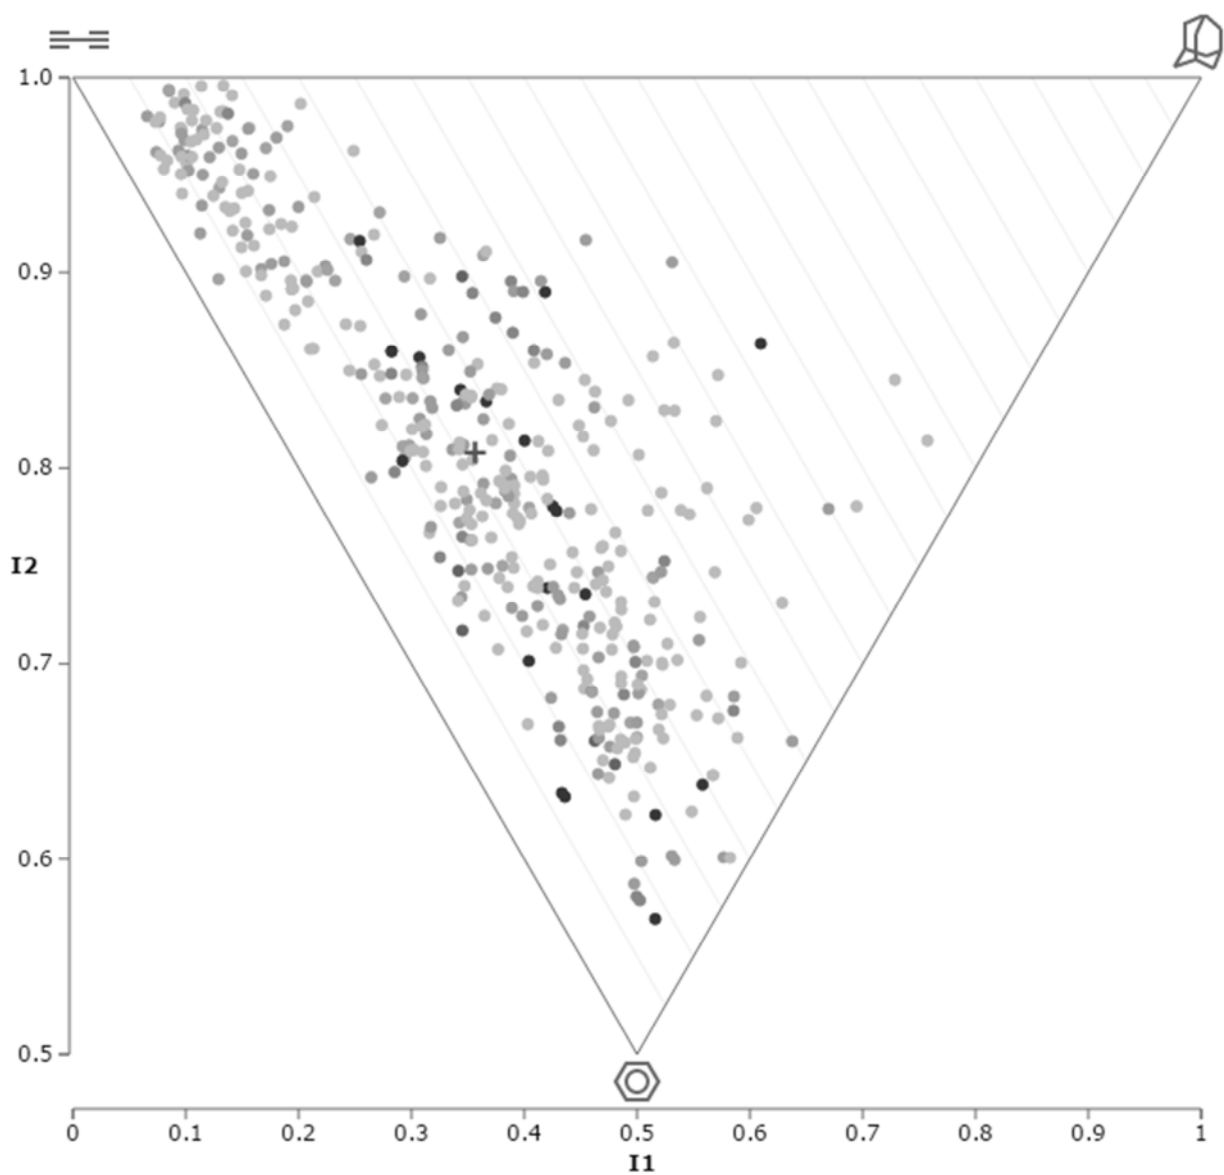

**Figure S12.** A PMI plot of the 409 virtual compounds generated by the process shown in Figure S10 (mean PMI coordinates:  $I_1 = 0.356$ ,  $I_2 = 0.808$  [denoted by +]).

## 2.5 Analysis of azetidine-based Scaffolds 4-11

As summarized in Figure S13, scaffolds **4-11** (Figure S14) were decorated once using the Standard LLAMA Capping Groups (SLCGs, Figure S1). The following reaction types were enabled in LLAMA: reductive amination, Suzuki coupling, Buchwald-Hartwig amination, sulfonamide formation, urea formation, alcohol alkylation, carbamate formation, secondary amide alkylation, secondary amide arylation, amide formation, alcohol arylation. For each scaffold **4-11** the average AlogP and number of heavy atoms were calculated for the derived compounds (Table S5, Figure 4 [Manuscript]). Individual molecular property plots (AlogP versus number of Heavy Atoms) for compounds derived from scaffolds **4-11** are shown in Figure S15. A PMI plot of low-lying conformers for the 1210 compounds derived through virtual decoration of scaffolds **4-11** is shown in Figure S16, whilst individual plots for each scaffold are shown in Figure S17.

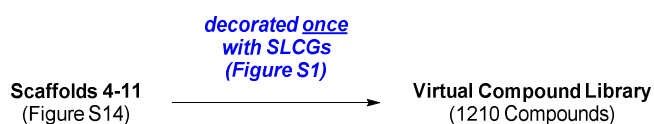

**Figure S13.** An overview of the decoration process for the azetidine-based scaffolds **4-11**.



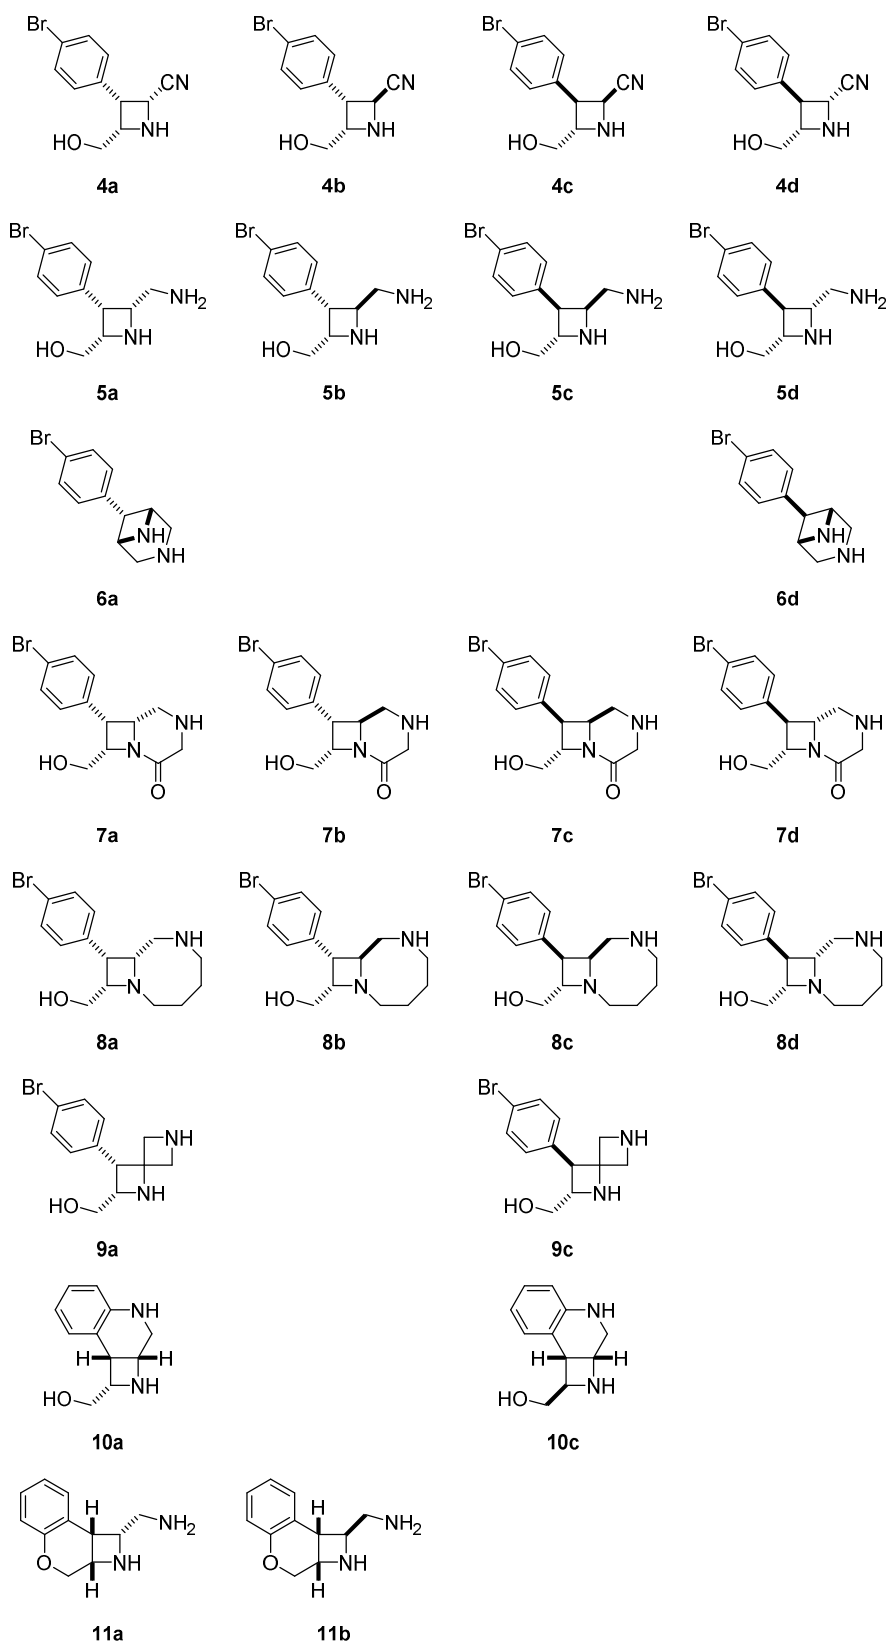

**Figure S14.** Azetidines-based scaffolds 4-11 included in the decoration process.

| Scaffolds | No. Derivatives | $\mu$ AlogP | $\sigma$ AlogP | $\mu$ HA | $\sigma$ HA |
|-----------|-----------------|-------------|----------------|----------|-------------|
| 4a-d      | 160             | 2.14        | 0.79           | 22.55    | 2.19        |
| 5a-d      | 264             | 1.45        | 0.83           | 22.64    | 2.10        |
| 6a,d      | 114             | 2.09        | 0.81           | 21.54    | 2.03        |
| 7a-d      | 160             | 1.65        | 0.77           | 25.55    | 2.19        |
| 8a-d      | 160             | 2.68        | 0.85           | 26.55    | 2.19        |
| 9a,c      | 132             | 1.51        | 0.74           | 23.64    | 2.10        |
| 10a,c     | 116             | 1.31        | 0.80           | 21.90    | 2.05        |
| 11a-b     | 104             | 1.15        | 0.76           | 21.77    | 1.96        |

**Table S5.** Average molecular properties for the 1210 derivative compounds generated by the process shown in Figure S13 with respect to parent scaffolds 4-11 (values calculated using Dotmatics Vortex).

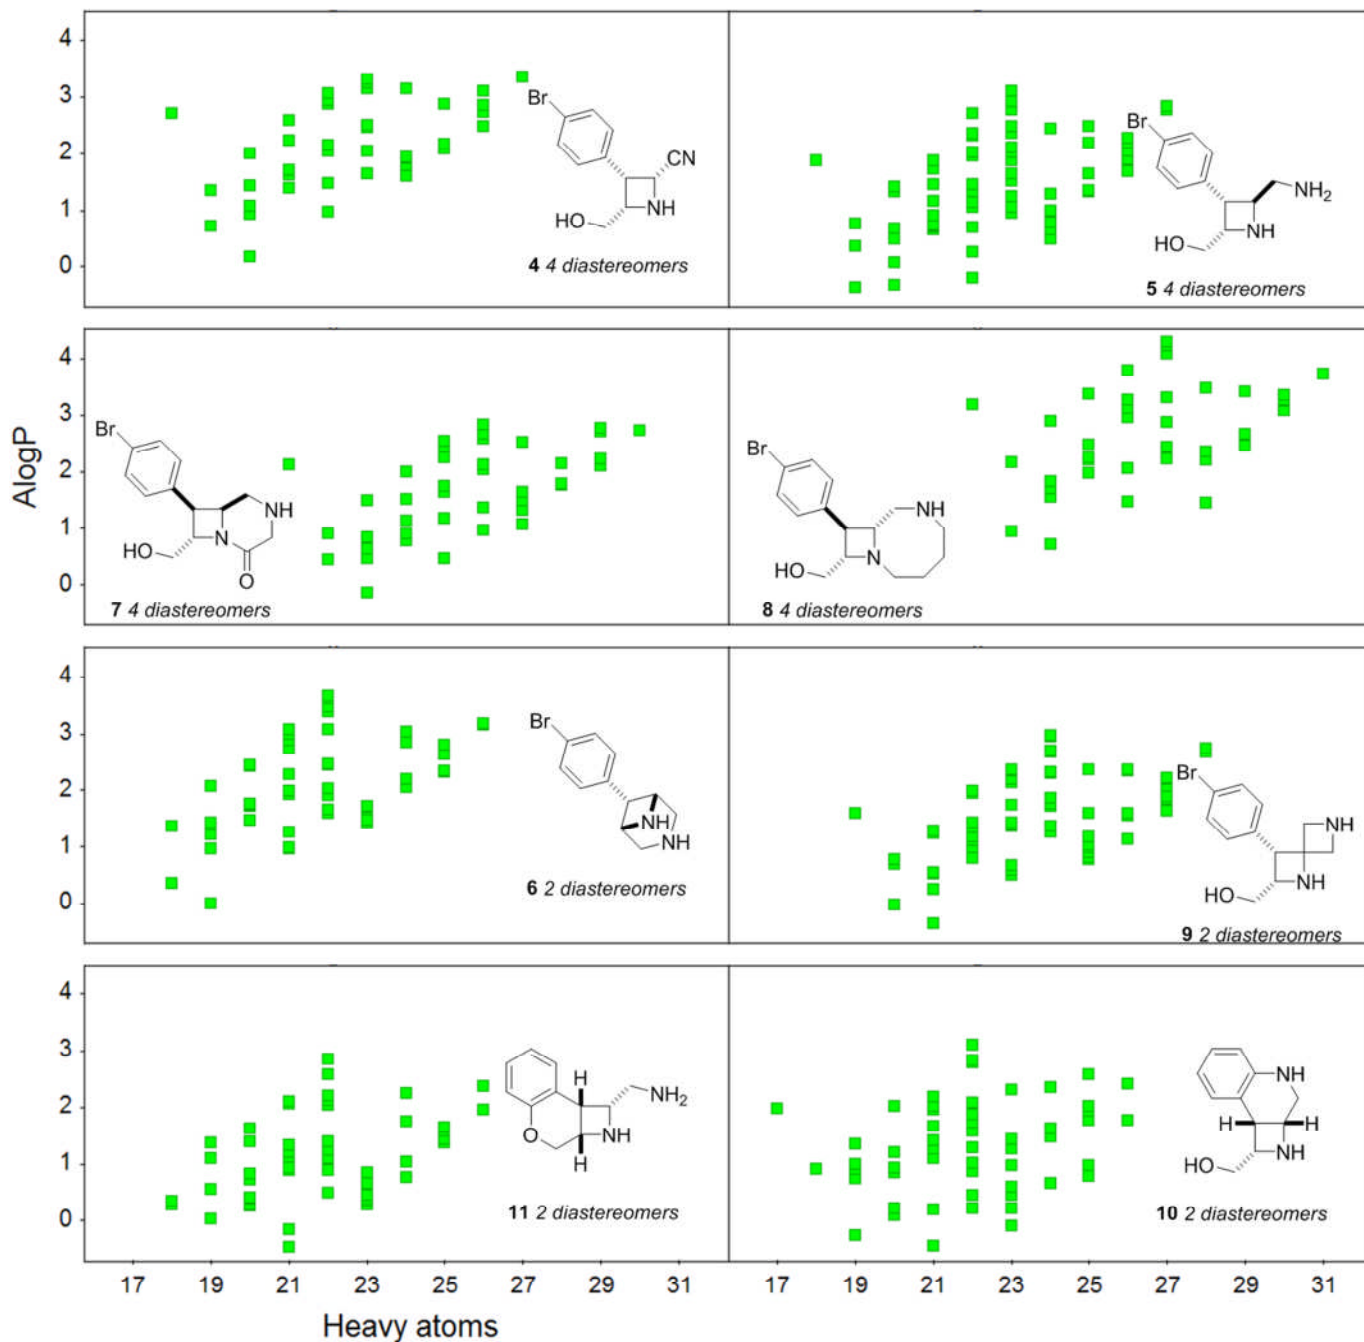

**Figure S15.** Molecular property analyses of the 1210 virtual compounds derived through decoration of scaffolds 4-11 (Figure S14).

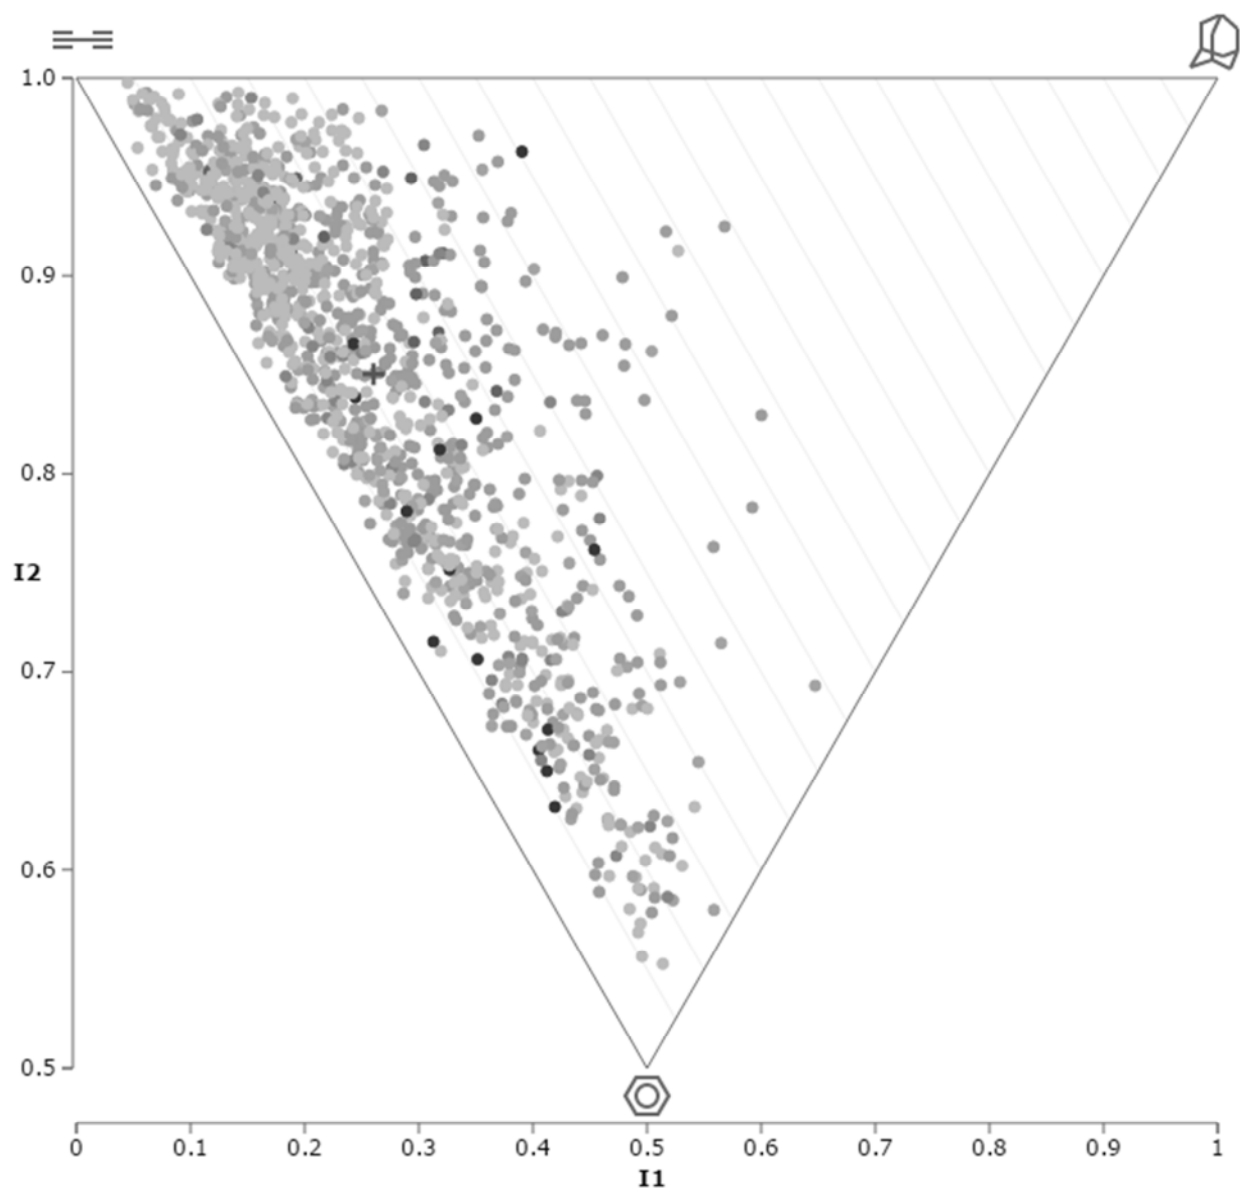

**Figure S16.** A PMI plot of the 1210 virtual compounds generated by the process shown in Figure S13 (mean PMI coordinates:  $I_1 = 0.260$ ,  $I_2 = 0.850$  [denoted by +]).

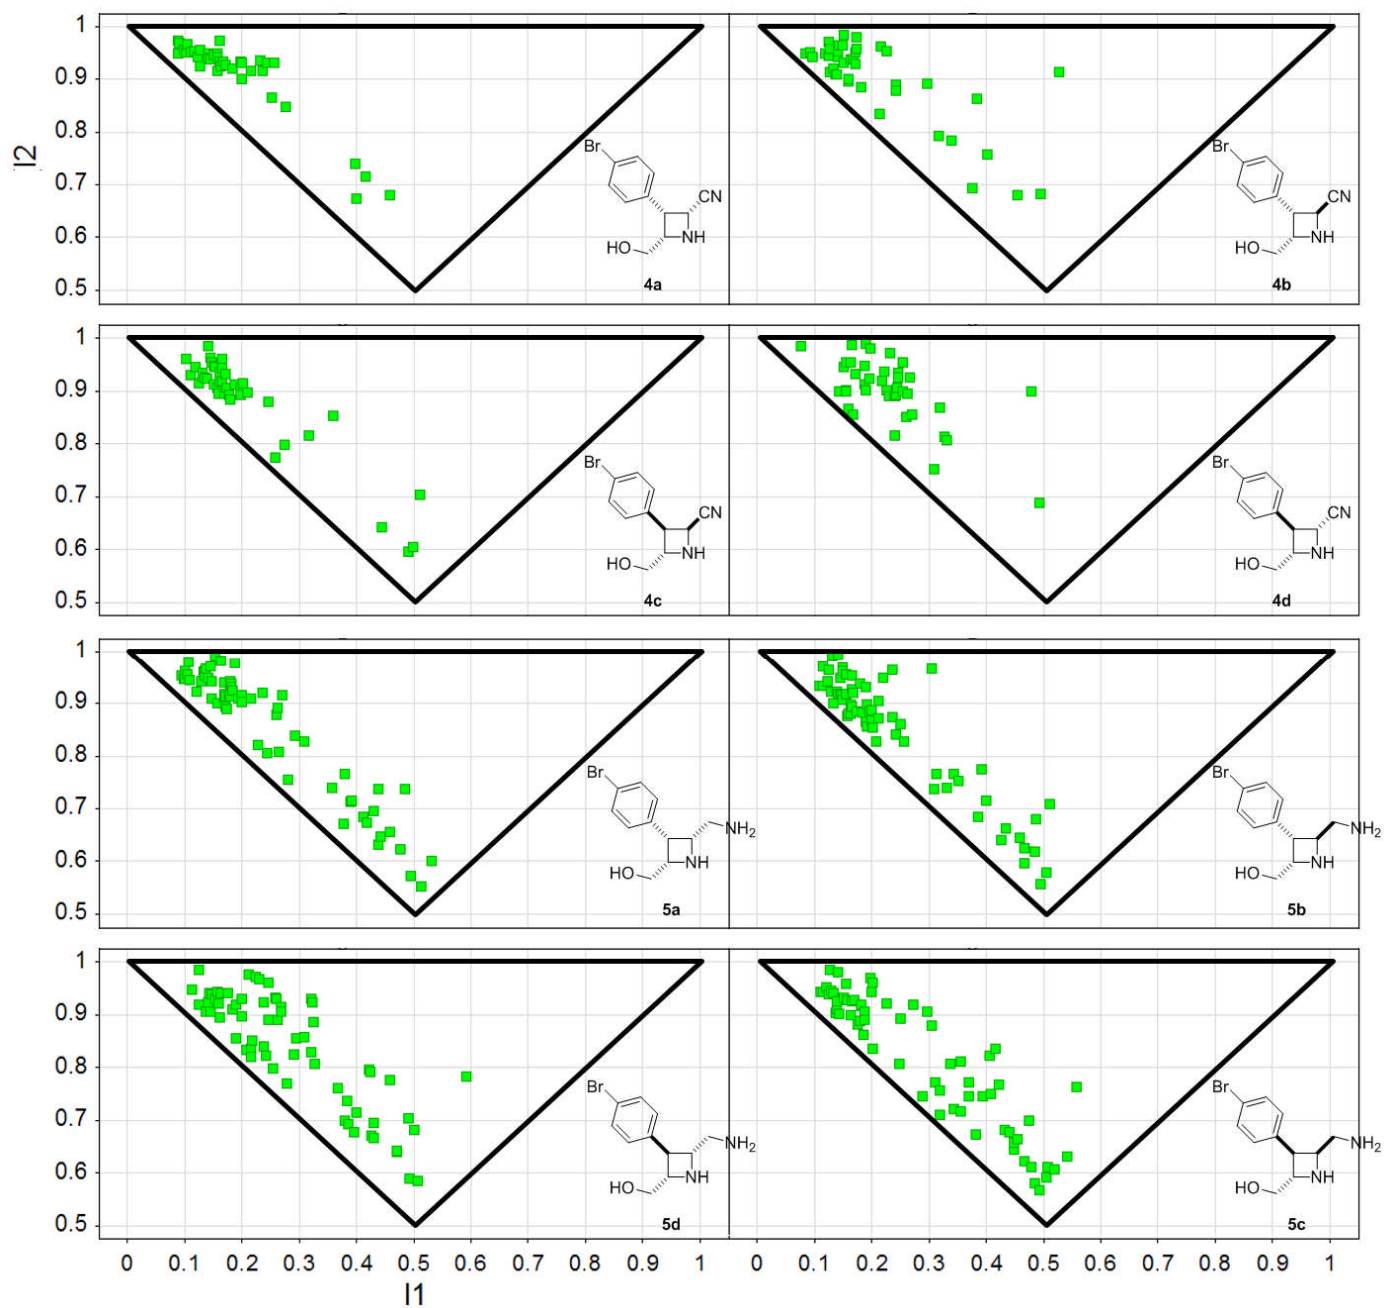

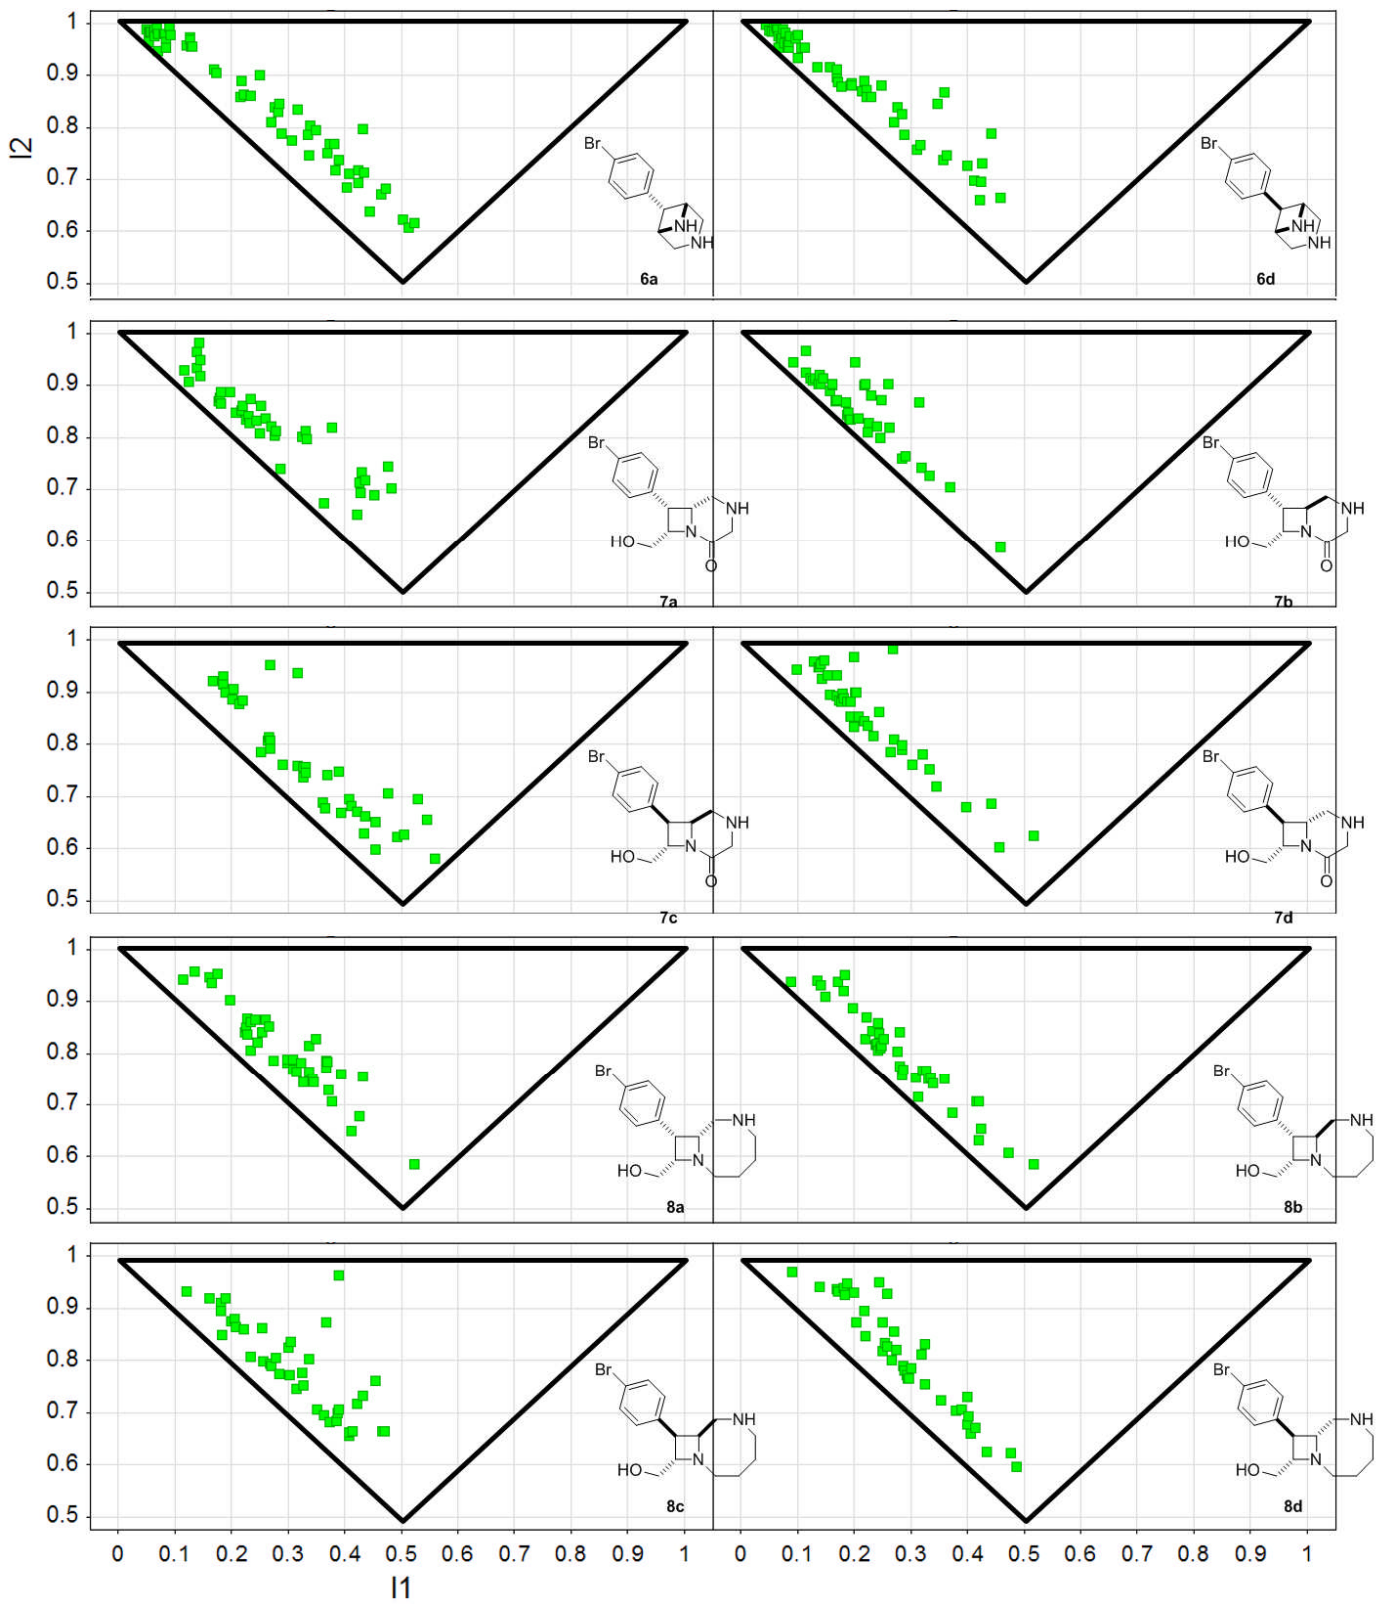

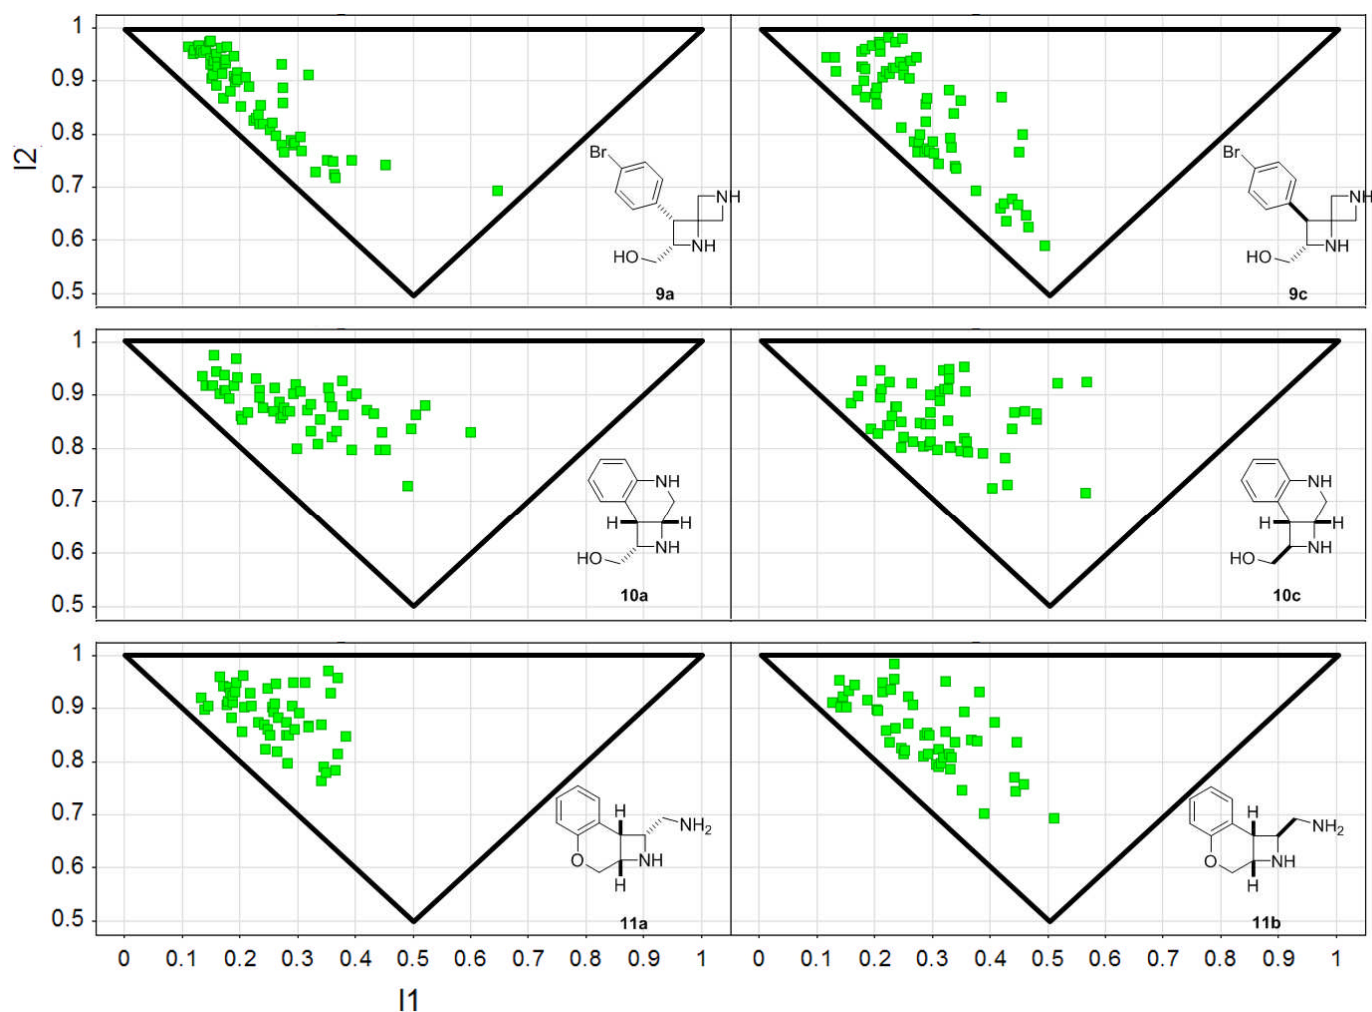

**Figure S17.** PMI distributions of the 1210 compounds (generated by the process shown in Figure S13) with respect to the parent scaffolds **4-11**.

## 2.6 Analysis of spirocyclic scaffolds **12-13**

As summarized in Figure S18, scaffolds **12-13** were decorated once or twice using the Standard LLAMA Capping Groups (SLCGs). The following reaction types were enabled in LLAMA: reductive amination, Suzuki coupling, Buchwald-Hartwig amination, sulfonamide formation, urea formation, alcohol alkylation, carbamate formation, secondary amide alkylation, secondary amide arylation, amide formation, alcohol arylation. A molecular property plot for the entire library (AlogP versus number of Heavy Atoms) is shown in Figure S19, whilst individual molecular property plots for compounds derived from scaffolds **12-13** are shown in Figure S20. A PMI plot (including standard deviations) of the average PMI values for compounds derived from scaffolds **12-13** is shown in Figure S21. The average PMI values are given in Table S6. A PMI plot of low-lying conformers for the 2700 compounds derived through virtual decoration of scaffolds **12-13** are shown in Figure S22, whilst individual plots for each scaffold are shown in Figure S23.

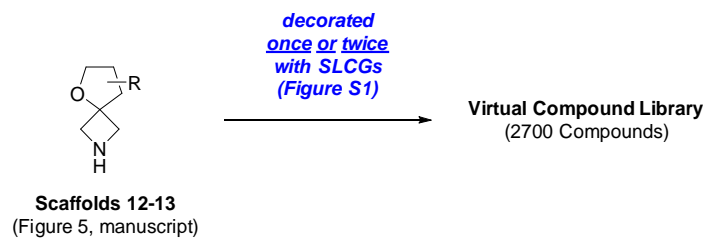

**Figure S18.** An overview of the decoration process for the azetidine-based scaffolds **12-13**.

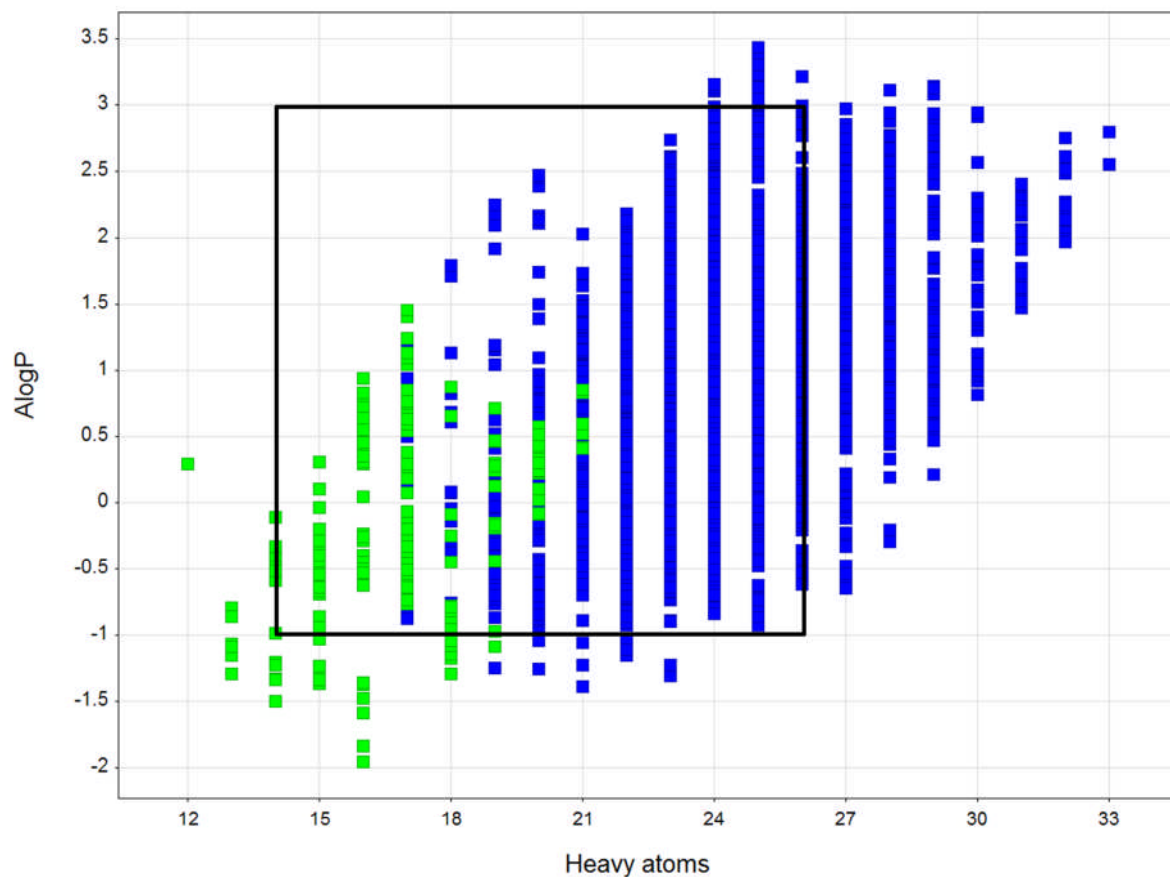

**Figure S19.** Molecular property analyses of the 2700 virtual compounds derived through decoration of scaffolds **12-13**. The data set includes 182 singly decorated compounds (green squares) and 2518 doubly decorated compounds (blue squares). Lead-like space ( $-1 \leq \text{AlogP} \leq 3$ ;  $14 \leq \text{HA} \leq 26$ ) is outlined by the black rectangle. 2074 of the 2700 compounds (77%) are lead-like according to these constraints. 148 of 182 singly decorated compounds (81%) are lead-like; 1926 of 2518 doubly decorated compounds (76%) are lead-like.

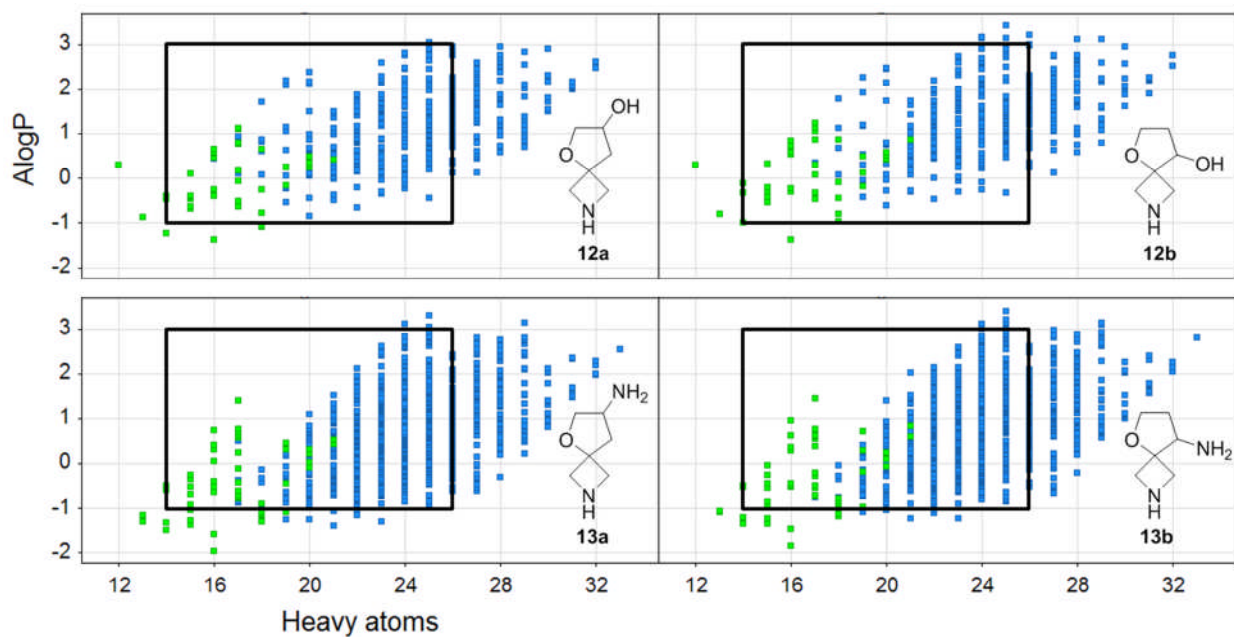

**Figure S20.** Molecular property analyses of the 2700 virtual compounds with respect to the parent scaffolds **12-13**. Scaffold **12a** has 377 derivatives (39 singly decorated, 338 doubly decorated), of which 284 are lead-like (75%: 33 singly decorated derivatives, 251 doubly decorated derivatives). Scaffold **12b** has 377 derivatives (39 singly decorated, 338 doubly decorated), of which 283 are lead-like (75%: 36 singly decorated derivatives, 247 doubly decorated derivatives). Scaffold **13a** has 973 derivatives (52 singly decorated, 921 doubly decorated), of which 752 are lead-like (77%: 38 singly decorated derivatives, 714 doubly decorated derivatives). Scaffold **13b** has 973 derivatives (52 singly decorated, 921 doubly decorated), of which 755 are lead-like (78%: 41 singly decorated derivatives, 714 doubly decorated derivatives).



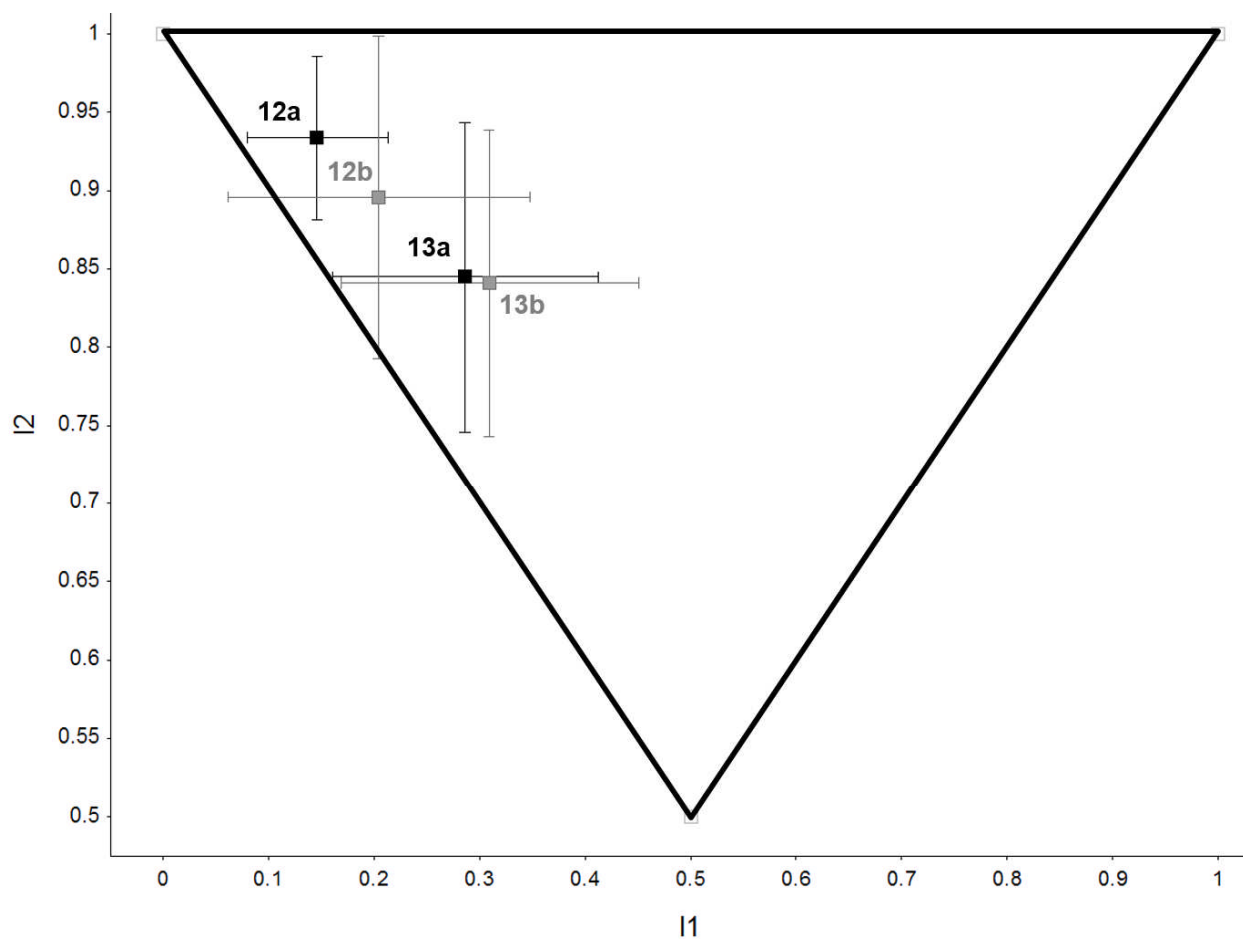

**Figure S21.** Average PMI values for the compounds derived from scaffolds **12-13** including standard deviations. See table S6 for further information.

| Scaffold   | No. Derivatives | $\mu I1$ | $\mu I2$ | $\sigma I1$ | $\sigma I2$ |
|------------|-----------------|----------|----------|-------------|-------------|
| <b>12a</b> | 377             | 0.146    | 0.934    | 0.067       | 0.052       |
| <b>12b</b> | 377             | 0.286    | 0.845    | 0.126       | 0.099       |
| <b>13a</b> | 973             | 0.204    | 0.896    | 0.143       | 0.103       |
| <b>13c</b> | 973             | 0.309    | 0.841    | 0.141       | 0.098       |

**Table S6.** Average PMI values for the compounds derived from scaffolds **12-13** including standard deviations (calculated using Dotmatics Vortex).

These values were used to plot Figure 5 (manuscript).

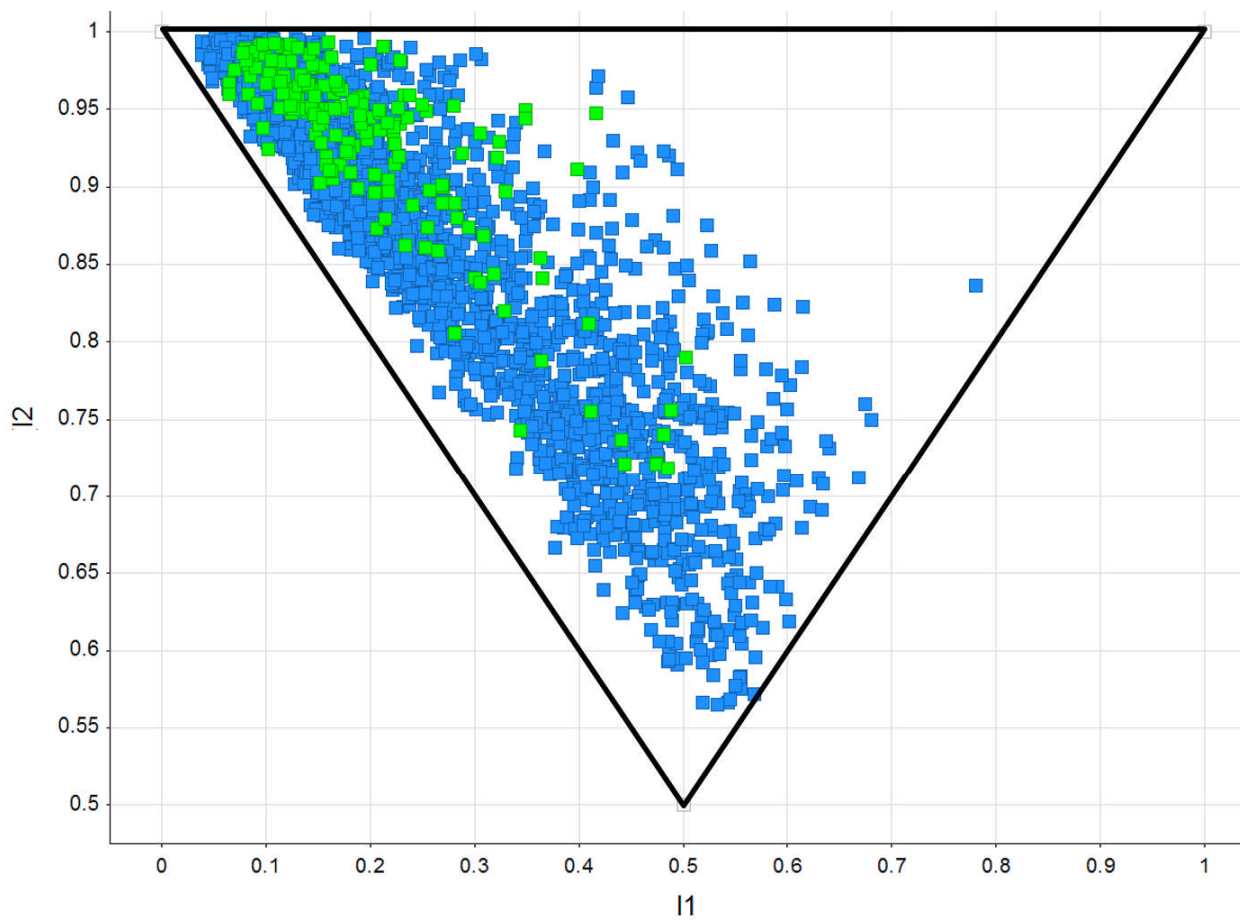

**Figure S22.** A PMI plot of the 2700 virtual compounds generated in Figure S18 (mean PMI coordinates:  $I_1 = 0.245$ ,  $I_2 = 0.874$ ). Singly decorated derivatives, green squares, have mean PMI coordinates:  $I_1 = 0.197$ ,  $I_2 = 0.930$ . Doubly decorated derivatives, blue squares, have mean PMI coordinates:  $I_1 = 0.249$ ,  $I_2 = 0.870$ .

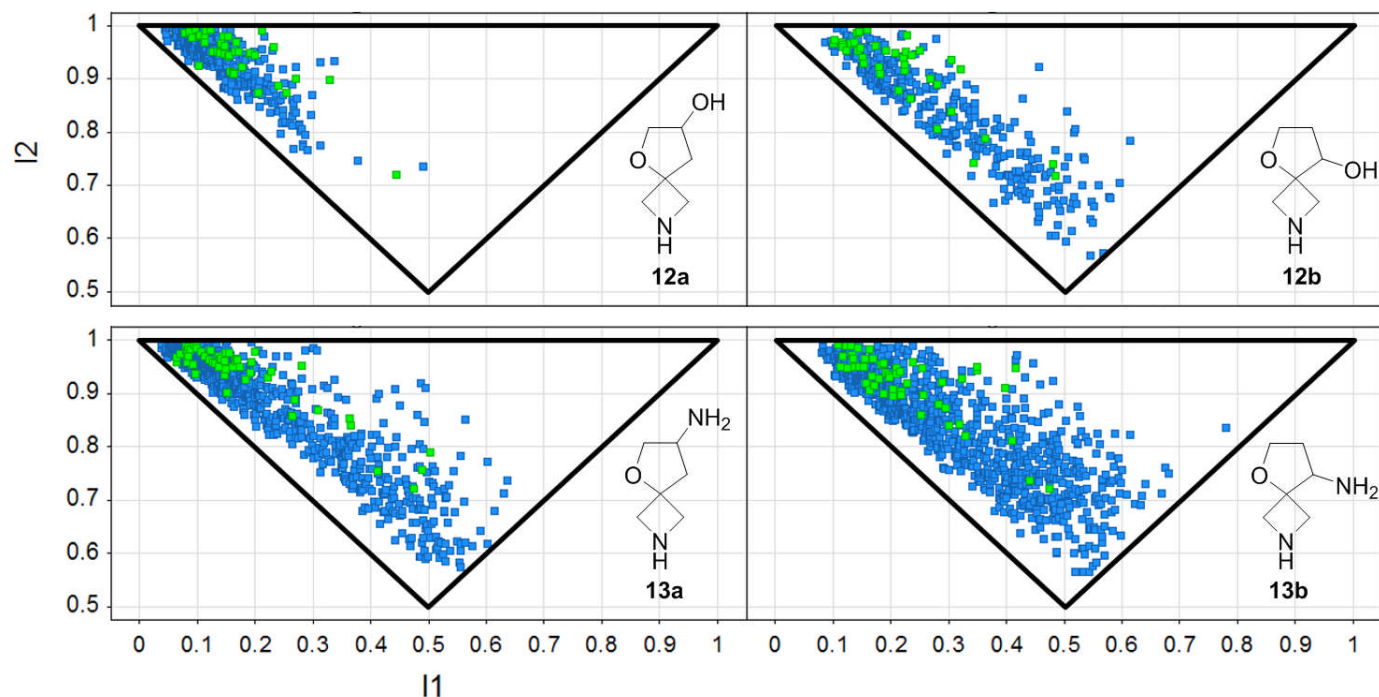

**Figure S23.** A PMI plot of the 2700 virtual compounds generated in Figure S18 with respect to the parent scaffold **12-13**.

## 2.7 Analysis of oxetane scaffolds **17a-e**

As summarized in Figure S24, virtual decoration of the carboxylic acid functionality in scaffolds **17a-e** with 28 small amines (criteria:  $\leq 8$  heavy atoms; commercially available) shown in Figure S25, generated a library of 168 amides. A molecular property plot for the library (AlogP versus number of Heavy Atoms) is shown in Figure S26. Derivatives with ( $9 \leq \text{heavy atoms} \leq 17$ ;  $-1 \leq \text{AlogP} \leq 3$ ) were considered to be fragment-like.

The 61 fragment-like compounds derived from scaffolds **17a-e** were compared with 257 randomly chosen commercially-available fragments from the eMolecules database and 261 randomly chosen fragments from the GDB-17 database of exhaustively enumerated compounds. Accelrys Pipeline Pilot version 8.5 (Pipeline Pilot v8.5.0.200, Accelrys<sup>®</sup> Software Inc., 2011) was used to process the selection of these compounds, as shown in Figure S27. The SMILES for the eMolecules compounds are given in Table S7. Plane of best comparison of the three libraries is shown in Figure S28.

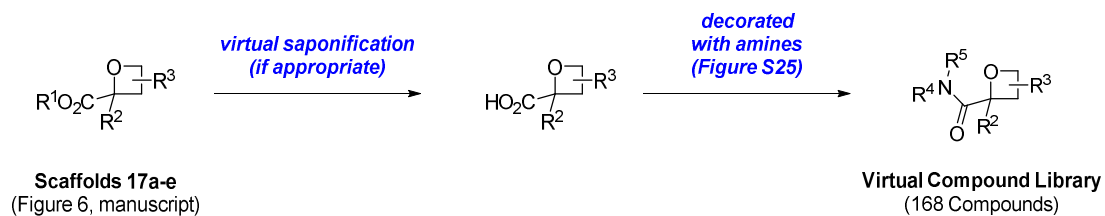

**Figure S24.** An overview of the decoration process for oxetane-based scaffolds **17a-e**.

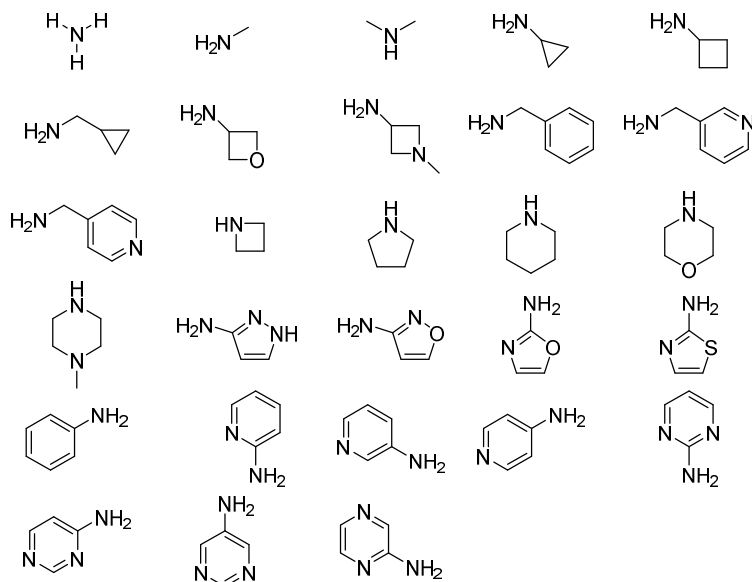

**Figure S25.** Amines used to decorate scaffolds **17a-e**.

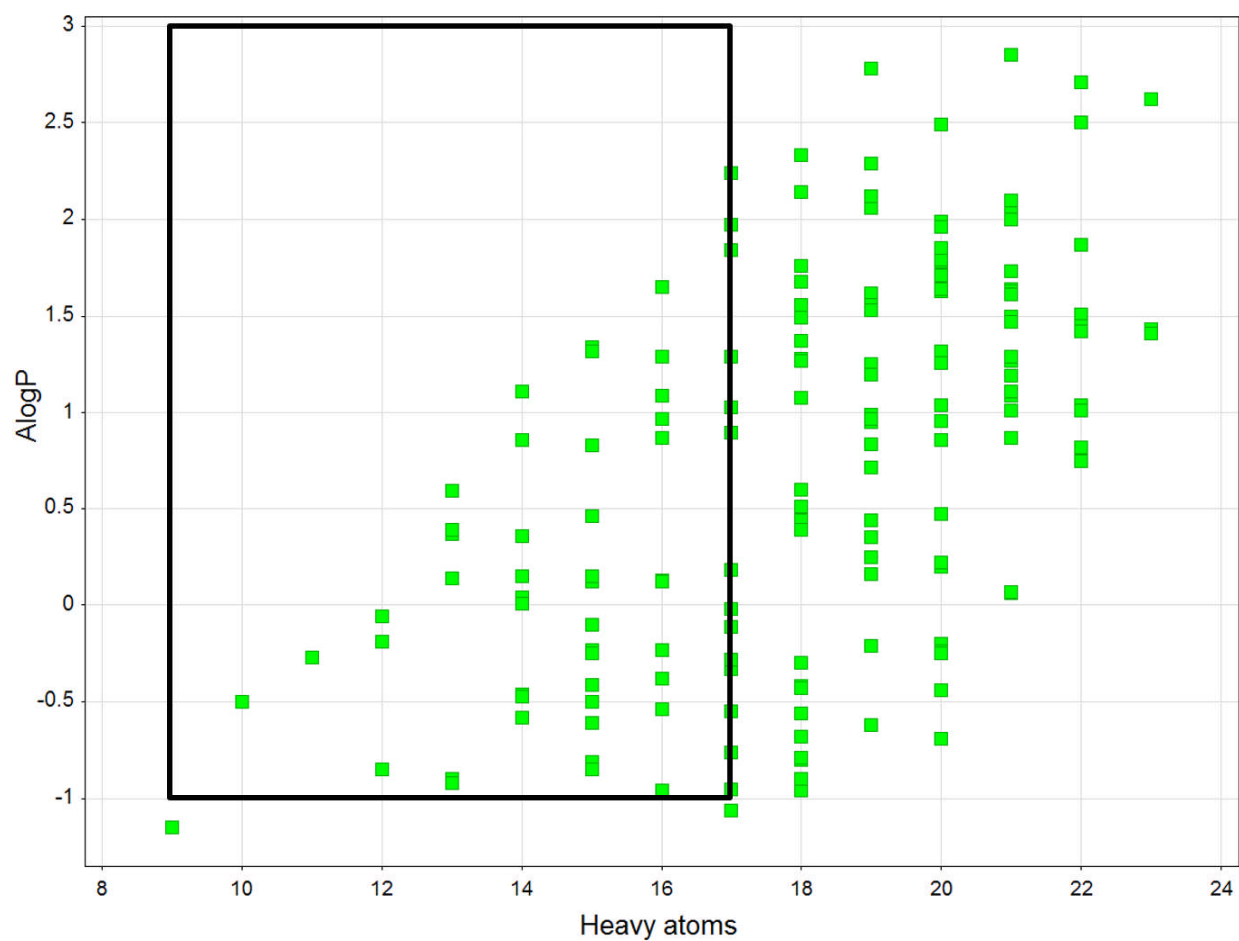

**Figure S26.** Molecular properties analysis for the 168 compounds generated from scaffolds **17a-e** (Figure S24). The black box highlights the space considered to be fragment-like ( $9 \leq \text{heavy atoms} \leq 17$ ;  $-1 \leq \text{AlogP} \leq 3$ ), in which 61 of 168 compounds were found (36%).

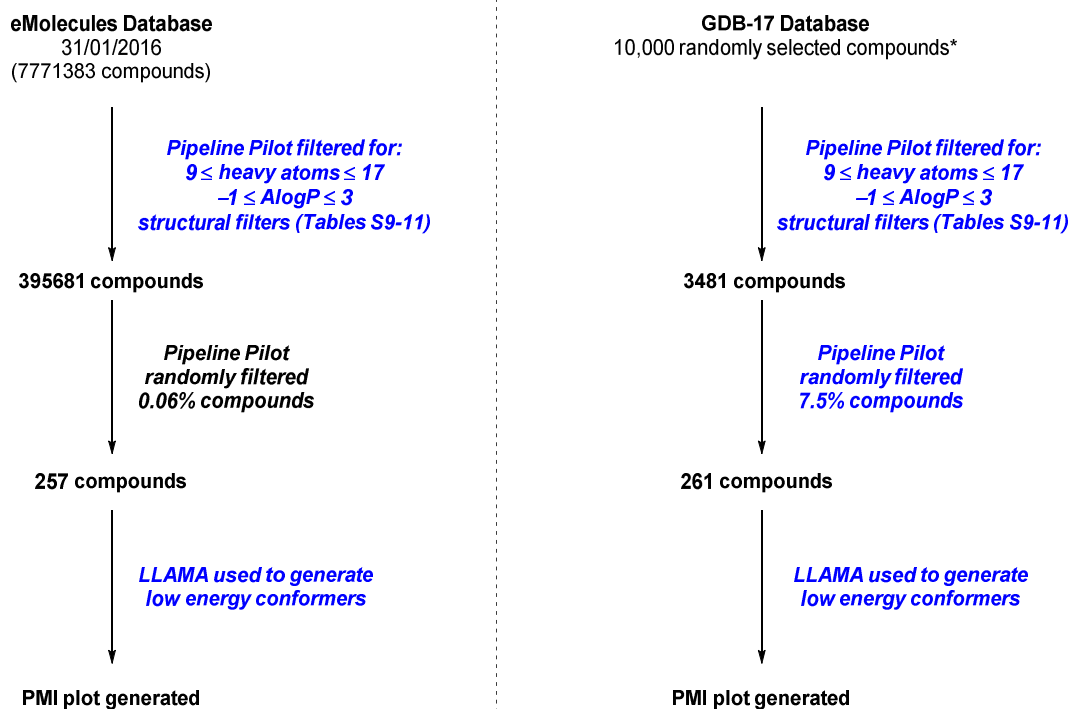

**Figure S27.** An overview of the enumeration process for selecting compounds from the eMolecules and GDB-17 databases. Pipeline pilot was used to filter the libraries for fragment-like molecular properties and to remove any structural liabilities (further information in Section 2.7.1 and Tables S9-11). The heavy atoms filter counted the following elements: C, N, O, S, F, Cl, Br, I. Libraries of ~260 compounds were randomly selected in Pipeline Pilot. Finally, LLAMA was used to generate low energy 3-D conformers. \*The 10,000 GDB-17 compounds were selected at random from a database of 166 billion compounds by Prof. Jean-Louis Reymond and Mahendra Awale (University of Berne) and were provided to us in a personal communication.

| Entry | Canonical SMILES                                   |
|-------|----------------------------------------------------|
| 1     | <chem>OCC1CCCCN1C(=O)CC[n]1c[n]cc1</chem>          |
| 2     | <chem>C[n]1c([n][n]c1SCC(N)=O)-c1cc[n]cc1</chem>   |
| 3     | <chem>CCC(=O)c1cc(C(O)C(O)=O)c(CO)cc1</chem>       |
| 4     | <chem>CCc1[nH]c([n][n]1)S(=O)(=O)CC1CCCCO1</chem>  |
| 5     | <chem>COC(=O)C(NC(=O)OC(C)(C)C)C1COC1</chem>       |
| 6     | <chem>OC(=O)CCCN1C=Nc2ccccc2C1=O</chem>            |
| 7     | <chem>COCCN1Cc2cccc(C(O)=O)c2C1=O</chem>           |
| 8     | <chem>CC(C)(C)C(=O)NCC(=O)Nc1c[n]ccc1</chem>       |
| 9     | <chem>CN1CCN(CC(N)Cc2ccccc2)CC1</chem>             |
| 10    | <chem>Cc1[n]c(CNC(=O)NCc2cc[nH][n]2)c[s]1</chem>   |
| 11    | <chem>CCC(C)NC(=O)c1c[n][n](CCC(O)=O)c1</chem>     |
| 12    | <chem>Cc1ccc(o1)C(C)(O)CNC(=O)COCC</chem>          |
| 13    | <chem>NS(=O)(=O)c1ccc(cc1)OCc1[n]oc[n]1</chem>     |
| 14    | <chem>Nc1cc(C#N)c([n]c1OC(F)(F)F)C(N)=O</chem>     |
| 15    | <chem>O=C1NCCNc2c1c[n]c1cc(F)ccc12</chem>          |
| 16    | <chem>Nc1c[n]c(N)c(OC(F)(F)F)c1CC(O)=O</chem>      |
| 17    | <chem>CC(C)CNS(=O)(=O)c1cccc2[n]o[n]c21</chem>     |
| 18    | <chem>Cc1[n][n](CC(O)=O)c2[n]ccc(C3CC3)c21</chem>  |
| 19    | <chem>COC(=O)C1CCCN1c1cccc(CO)c1</chem>            |
| 20    | <chem>COc1ccc([n][n]1)C(=O)N1CC2CC1CC2</chem>      |
| 21    | <chem>Cc1[n]cc[n]1Cc1ccc(cc1)NC(N)=O</chem>        |
| 22    | <chem>CCNC(=O)N1C2CCCC2CC1C(O)=O</chem>            |
| 23    | <chem>O=S1(=O)COCCN1Cc1cc(Cl)ccc1F</chem>          |
| 24    | <chem>Nc1cc(-c2c[n]c(N)c[n]2)c2cc[nH]c2[n]1</chem> |
| 25    | <chem>CSCC(=O)NCCc1[n]oc([n]1)C(F)(F)F</chem>      |
| 26    | <chem>COc1c([n]cc(F)c1C(N)=O)OC(F)(F)F</chem>      |
| 27    | <chem>O=C(Nc1cc(F)cc(F)c1)C1CCCCN1</chem>          |
| 28    | <chem>CS(=O)(=O)N(Cc1cocc1)Cc1ccc[s]1</chem>       |
| 29    | <chem>CN(C)S(=O)(=O)NCCc1cccc(Br)c1</chem>         |
| 30    | <chem>CC(=O)NCCOc1ccc2ccccc2[n]1</chem>            |
| 31    | <chem>CC(C)(C)CC(=O)O/N=C(/N)c1c[n]ccc1</chem>     |
| 32    | <chem>NS(=O)(=O)c1[n]c(O)cc(O)c1OC(F)(F)F</chem>   |
| 33    | <chem>CNC(=O)CCc1cc2ccccc2[n]c1O</chem>            |
| 34    | <chem>CS(=O)(=O)N1CCN(CC1)c1cccc(Br)c1</chem>      |
| 35    | <chem>CN(Cc1ccc(Cl)[s]1)C(=O)C1CCCC1N</chem>       |
| 36    | <chem>NS(=O)(=O)NC1(CCCC1)c1cccc(Cl)c1</chem>      |
| 37    | <chem>COc1cc(ccc1[C@@H](N)CC#N)C(F)(F)F</chem>     |
| 38    | <chem>COc1ccc(cc1)OCCc1[n][n]c(N)[s]1</chem>       |
| 39    | <chem>CN(Cc1ccc(cc1)OCC)C(=O)NCC</chem>            |
| 40    | <chem>O=C1OC(Nc2ccccc[n]2)c2ccccc21</chem>         |
| 41    | <chem>CC(C)CCOc1ccc(F)cc1S(N)(=O)=O</chem>         |
| 42    | <chem>O=C(Cc1ccc(F)cc1F)c1c[n]ccc1</chem>          |
| 43    | <chem>Cc1[n]oc(CNC(=O)c2ccc(Cl)cc2)[n]1</chem>     |
| 44    | <chem>CC(C)(C)NCC(=O)Nc1cc(Cl)ccc1F</chem>         |
| 45    | <chem>CCSCC[n]1cc(CCO)c([n]1)C(F)(F)F</chem>       |
| 46    | <chem>O=C(NC1CCCC1)c1c[n]2CCCCc2[n]1</chem>        |
| 47    | <chem>CCc1[n]o[n]c1NC(=O)c1cccc1F</chem>           |
| 48    | <chem>CC(C)(C)[n]1[n]c(c(C#N)c1N)-c1cco1</chem>    |
| 49    | <chem>Cc1cc(NC(=O)Nc2ccccc2)[n]cc1</chem>          |
| 50    | <chem>Cc1ccc2ccccc(OC(=O)N(C)C)c2[n]1</chem>       |

| Entry | Canonical SMILES                                    |
|-------|-----------------------------------------------------|
| 51    | <chem>CN(Cc1ccc(Cl)cc1F)CC1COCC1</chem>             |
| 52    | <chem>CN(C(=O)C=Cc1ccco1)c1ccccc1</chem>            |
| 53    | <chem>Cc1ccc(cc1)C(OCC(O)=O)C(F)(F)F</chem>         |
| 54    | <chem>Cc1o[n]c(C)c1C(=O)NCC1CCCC1</chem>            |
| 55    | <chem>CN1c2ccc(cc2CCC1=O)S(N)(=O)=O</chem>          |
| 56    | <chem>CC(=O)Cc1cc(c(cc1)OC)S(N)(=O)=O</chem>        |
| 57    | <chem>CO[C@@H]1CN(C[C@H]1NC)C(=O)OC(C)(C)C</chem>   |
| 58    | <chem>COc1c(C(=O)OC)c(CN)ccc1C#N</chem>             |
| 59    | <chem>CC(=O)Nc1[n][n](c(N)[n]1)-c1ccccc1</chem>     |
| 60    | <chem>Nc1cc(c(Cl)cc1)S(=O)(=O)N1CCCC1</chem>        |
| 61    | <chem>COc1cc(Br)cc([C@@H]2COCCN2)c1O</chem>         |
| 62    | <chem>Cc1c(c[n][n]1C)NS(=O)(=O)c1ccc[s]1</chem>     |
| 63    | <chem>Cc1ccc(Cl)cc1N1C(=O)NN=C1CN</chem>            |
| 64    | <chem>CC(=O)NCCNC(=O)CSC1CCCC1</chem>               |
| 65    | <chem>CN(CC(O)=O)C(=O)CCc1ccccc1</chem>             |
| 66    | <chem>COc1ccc(cc1F)C(=O)CCC(O)=O</chem>             |
| 67    | <chem>CN(C)/C=C/C(=O)c1ccc2[n]coc12</chem>          |
| 68    | <chem>COCCNCCOc1ccc(cc1)OC</chem>                   |
| 69    | <chem>O=C(Nc1ccc(F)cc1Cl)c1c[n][n][nH]1</chem>      |
| 70    | <chem>COc1cc(cc(OC)c1O)[C@@H](N)C(F)F</chem>        |
| 71    | <chem>CC(C)(C)OC(=O)N1CC2C=CC(O)C2C1</chem>         |
| 72    | <chem>CCOC(=O)c1cc2c(cc1)OC(=O)N2C</chem>           |
| 73    | <chem>CCc1[n]c(c[s]1)C(C)NCC(=O)N(C)C</chem>        |
| 74    | <chem>COc1cc(ccc1Cl)[C@@H]1COCC(N)=N1</chem>        |
| 75    | <chem>CC(C)(CO)[C@@H](N)c1ccc(Br)c(F)c1O</chem>     |
| 76    | <chem>O=C1Cc2ccccc2-c2ccc[n]c2N1</chem>             |
| 77    | <chem>Nc1cc[n]([n]1)-c1ccc(c[n]1)C(F)(F)F</chem>    |
| 78    | <chem>C[C@@H](N)[C@H](O)c1ccc(Cl)cc1C(F)(F)F</chem> |
| 79    | <chem>CC1CN(C2CCOC2=O)c2ccccc21</chem>              |
| 80    | <chem>COc1ccc(cc1)/C=C/C(=O)OCC#N</chem>            |
| 81    | <chem>COc1ccc(cc1)Oc1ccc(N)c[n]1</chem>             |
| 82    | <chem>Cc1cc(NC(C)c2ccco2)[n]c(N)[n]1</chem>         |
| 83    | <chem>COc1c(c[n]cc1C(F)(F)F)OC(F)F</chem>           |
| 84    | <chem>COc1[n]cc(C#N)c(O)c1OC(F)(F)F</chem>          |
| 85    | <chem>OCC1(CCCCC1)NCc1ccccc1</chem>                 |
| 86    | <chem>COc1cc(ccc1CCC(O)=O)OCC</chem>                |
| 87    | <chem>CC(C)(C)c1ccc(cc1)OC/C(/N)=N/O</chem>         |
| 88    | <chem>Nc1cc(ccc1)-[n]1[n]ccc1C(F)(F)F</chem>        |
| 89    | <chem>CCOC(=O)CC(=O)c1cc(Br)c(F)cc1</chem>          |
| 90    | <chem>N#CCOC(=O)c1cc2c(F)cccc2[s]1</chem>           |
| 91    | <chem>CCOC(=O)Cc1[n]c2ccc(F)cc2o1</chem>            |
| 92    | <chem>N#CCc1[n]ccc(c1O)-c1ccccc1</chem>             |
| 93    | <chem>OC(=O)c1c[nH]c2c1c(F)c(F)c(F)c2F</chem>       |
| 94    | <chem>BrC1ccc[n]2c([n][n]c21)-c1ccccc1</chem>       |
| 95    | <chem>Cc1ccc2NCC(Cc2c1)C(=O)OCC</chem>              |
| 96    | <chem>COC1=CC=CN(Cc2ccc(Cl)[s]2)C1=O</chem>         |
| 97    | <chem>OC(=O)c1c[n]c2NC(=O)NC(=O)c2c1</chem>         |
| 98    | <chem>COCCC1(CCS(=O)(=O)CC1)C(O)=O</chem>           |
| 99    | <chem>CCNC1CN(CCC1)CCS(N)(=O)=O</chem>              |
| 100   | <chem>CCOC(=O)c1cc2C(=O)NC=N[n]2c1</chem>           |
| 101   | <chem>OS(=O)(=O)c1ccc(Cl)c2ccc[n]c12</chem>         |
| 102   | <chem>CC(=O)Nc1ccccc1OCC(N)=O</chem>                |



| Entry | Canonical SMILES                                |
|-------|-------------------------------------------------|
| 103   | <chem>CC(C)CC1NC(=O)C2CCCN2C1=O</chem>          |
| 104   | <chem>N[C@@]1(CO)C(=O)Nc2cc(Cl)c(F)cc12</chem>  |
| 105   | <chem>CCOC(=O)c1cc2c(N)[n]c[n]c2[nH]1</chem>    |
| 106   | <chem>CCC(CCO)NC(=O)Nc1cco[n]1</chem>           |
| 107   | <chem>N#CCC(=O)NCc1ccc(F)cc1F</chem>            |
| 108   | <chem>CCNC(N)=NCCc1cc[n][n]1C</chem>            |
| 109   | <chem>CC(C)C[C@@H](NC(=O)NCC=C)C(O)=O</chem>    |
| 110   | <chem>COCCOc1cc(O)c([s]1)C(=O)OC</chem>         |
| 111   | <chem>Cc1cc(NC2cc[n][n]2C)[n][n]1C</chem>       |
| 112   | <chem>Cc1cc(ccc1)C(=O)Nc1[n][nH]c[n]1</chem>    |
| 113   | <chem>COCCNC(=O)Nc1ccc(F)cc1</chem>             |
| 114   | <chem>COC(=O)c1cc([n]cc1)-c1cc[nH][n]1</chem>   |
| 115   | <chem>COc1ccc(c[n]1)[C@@H](N)CC(F)(F)F</chem>   |
| 116   | <chem>COc1cccc2cc(c[n]c21)C(N)=O</chem>         |
| 117   | <chem>OCc1cc([n]c(O)c1O)OC(F)(F)F</chem>        |
| 118   | <chem>NCc1cc[n][n]1CCc1cccc1</chem>             |
| 119   | <chem>Oc1c[n]cc(CC(O)=O)c1C(F)(F)F</chem>       |
| 120   | <chem>Cc1ccc([n][n]1)-c1ccc(CO)cc1</chem>       |
| 121   | <chem>CCN(Cc1cccc1)C(=O)CC#N</chem>             |
| 122   | <chem>CSC1CC(CC1)N(C)CCS(C)(=O)=O</chem>        |
| 123   | <chem>C1NCC21CC(C2)OCc1cccc1</chem>             |
| 124   | <chem>Cc1cc(C)[n]2c([n][n]c2[n]1)SCC=C</chem>   |
| 125   | <chem>CC(C)=CC(=O)NC(C)COCC(C)C</chem>          |
| 126   | <chem>CSc1ccc(CCC(O)=O)c(c1)C#N</chem>          |
| 127   | <chem>Cc1cc(c[n]c1NC)C1CCCN1C</chem>            |
| 128   | <chem>OC1CN(Cc2cc(Cl)ccc2F)CC1</chem>           |
| 129   | <chem>COc1ccc(Cl)c(O)c1[C@@H](N)C1CC1</chem>    |
| 130   | <chem>CC(NC(=O)C(N)CC)c1ccc(Cl)[s]1</chem>      |
| 131   | <chem>CNCc1ccc(cc1)-c1ccc[n]1</chem>            |
| 132   | <chem>CCCC[C@@H](O)[C@@H](N)c1cccc1F</chem>     |
| 133   | <chem>CC(C)(O)CNCc1cc(Br)ccc1F</chem>           |
| 134   | <chem>COC(=O)c1cccc2oc([n]c12)SC</chem>         |
| 135   | <chem>Cc1cc(CNCc2ccco2)ccc1</chem>              |
| 136   | <chem>CCOc1ccc(cc1)-c1[n]c(N)[n]o1</chem>       |
| 137   | <chem>Cc1[n]c(c[s]1)C(C(F)(F)S(N)=O)=O</chem>   |
| 138   | <chem>C(NC1CC1)c1cc2ccc[n]c2cc1</chem>          |
| 139   | <chem>CCOc1cc(CN)cc2cccc21</chem>               |
| 140   | <chem>OC(=O)c1cc(F)c(c(F)c1)C(F)(F)F</chem>     |
| 141   | <chem>OC(=O)Cc1cc(F)c(cc1)C(F)(F)F</chem>       |
| 142   | <chem>Nc1cc([n]o1)-c1cc2CCc2cc1</chem>          |
| 143   | <chem>Nc1cc([nH][n]1)C(=O)N1CCOCC1</chem>       |
| 144   | <chem>NC(=O)c1cccc2[n]c(CN)oc21</chem>          |
| 145   | <chem>CC(C)NCc1cc(c[nH]1)S(N)(=O)=O</chem>      |
| 146   | <chem>Nc1cccc2c1CCN2S(N)(=O)=O</chem>           |
| 147   | <chem>CCN(Cc1cc[n]cc1)C1CNC1</chem>             |
| 148   | <chem>CCCOCc1cc(O)[n]c(CO)[n]1</chem>           |
| 149   | <chem>CNCc1ccc(O)c2[n]cccc21</chem>             |
| 150   | <chem>Nc1[n]c(cc(N)[n+]1[O-])N1CCCC1</chem>     |
| 151   | <chem>NC(=O)CSc1[n][n]c(NC2CC2)[s]1</chem>      |
| 152   | <chem>CS(=O)(=O)c1ccc(F)cc1C(O)=O</chem>        |
| 153   | <chem>N[C@@H]1CCOc2c(F)cc(cc21)C#N</chem>       |
| 154   | <chem>Cc1ccc(c[n]1)[C@@H](O)[C@@H](N)CCC</chem> |

| Entry | Canonical SMILES                                |
|-------|-------------------------------------------------|
| 155   | <chem>CNC(C(N)=O)c1cc(Br)ccc1F</chem>           |
| 156   | <chem>Cc1cc(NS(=O)(=O)CC)[n](CC)[n]1</chem>     |
| 157   | <chem>Cc1[n][nH]cc1CNCCOCC</chem>               |
| 158   | <chem>CC(=O)c1[n]c2ccc(cc2o1)C#N</chem>         |
| 159   | <chem>COC(=O)c1c[n]c(cc1)NC1CC1</chem>          |
| 160   | <chem>CCC(C)N(CCN)Cc1ccco1</chem>               |
| 161   | <chem>COc1cc2C=CC(=O)N(C)c2cc1</chem>           |
| 162   | <chem>CC(C)(C)C(=O)NCC1CCNCC1</chem>            |
| 163   | <chem>Oc1cc(Br)c(F)cc1C(O)C(O)=O</chem>         |
| 164   | <chem>Cc1c2c(CC2=O)c(C)c2c1CC2=O</chem>         |
| 165   | <chem>COc1ccc2CCC(C(O)=O)c2c1</chem>            |
| 166   | <chem>CCOC(=O)c1cc(O)ccc1C#N</chem>             |
| 167   | <chem>CC(=O)c1cccc(c1N)C(F)(F)F</chem>          |
| 168   | <chem>CCS(=O)(=O)Nc1ccc(CC)cc1</chem>           |
| 169   | <chem>OC(=O)c1cc(F)c[n]c1C(F)(F)F</chem>        |
| 170   | <chem>CC=CC(=O)c1cc2OCOc2cc1</chem>             |
| 171   | <chem>C/C(=C/C(=O)OC)/Nc1ccccc1</chem>          |
| 172   | <chem>CC(C)N(CCN1CCC1)C(C)C</chem>              |
| 173   | <chem>COc1cc(ccc1)C1(CC1)C(C)O</chem>           |
| 174   | <chem>Nc1cc[n]c(OCC2CCC2)c1Br</chem>            |
| 175   | <chem>Cc1cc2[nH]cc(C(O)=O)c2cc1Cl</chem>        |
| 176   | <chem>NC(c1ccc[s]1)c1cc(F)ccc1</chem>           |
| 177   | <chem>COC(=O)Cc1ccc(Br)c(F)c1F</chem>           |
| 178   | <chem>Cc1[n][n]c(SCC)c2ccccc12</chem>           |
| 179   | <chem>NCCC(=O)NCc1cccc[n]1</chem>               |
| 180   | <chem>OC(=O)c1cccc2c[n][n]cc21</chem>           |
| 181   | <chem>C(c1cc[n]cc1)N1CCNCC1</chem>              |
| 182   | <chem>C[n]1[n][n]c2cc(ccc12)C(N)=O</chem>       |
| 183   | <chem>C[n]1c([n]c2c[n]ccc12)C(C)N</chem>        |
| 184   | <chem>OC(=O)c1c[s]c2N=CNC(=O)c12</chem>         |
| 185   | <chem>CN(C)Cc1ccc(cc1)C(N)=N</chem>             |
| 186   | <chem>NCC1CN(Cc2ccco2)CC1</chem>                |
| 187   | <chem>O=C1CC2C3CC(=O)C4C1C2CC34</chem>          |
| 188   | <chem>OC(=O)Cc1cc2cccc[n]2[n]1</chem>           |
| 189   | <chem>COC(=O)C(CN)c1ccccc1</chem>               |
| 190   | <chem>O=C(CC1CCNCC1)NC1CC1</chem>               |
| 191   | <chem>CC1CNCCN1c1[n]ccc[n]1</chem>              |
| 192   | <chem>Cc1ccc(F)c(O)c1[C@@H](N)CF</chem>         |
| 193   | <chem>CNC(=O)Nc1cc(C)cc(C)[n]1</chem>           |
| 194   | <chem>COc1c(F)c(ccc1CN)OC</chem>                |
| 195   | <chem>CC(=O)c1cccc2c1c[n][n]2C</chem>           |
| 196   | <chem>CC(=O)NC1CC(C)(C)CC(=O)C=1</chem>         |
| 197   | <chem>CCCCOc1[n]cccc1CN</chem>                  |
| 198   | <chem>C/C(=C/C#N)C(N)=O/c1ccc[s]1</chem>        |
| 199   | <chem>Cc1ccc(c(C#N)[n]1)C(=O)OC</chem>          |
| 200   | <chem>FC[C@@H](N1CCOCC1)C(F)(F)F</chem>         |
| 201   | <chem>N[C@@H](CF)c1ccc(F)c(F)c1F</chem>         |
| 202   | <chem>Cc1ccc(c(O)[n]1)-c1cc[n][nH]1</chem>      |
| 203   | <chem>Cc1cc(ccc1)NCCC(N)=O</chem>               |
| 204   | <chem>Cc1cc(O)c(c(c1)C#N)C(O)=O</chem>          |
| 205   | <chem>C[C@@H](O)[C@@H](N)c1cc(Cl)cc(F)c1</chem> |
| 206   | <chem>CCCCNc1ccc(CO)c[n]1</chem>                |

| Entry | Canonical SMILES                        |
|-------|-----------------------------------------|
| 207   | <chem>OCc1cccc([n]1)N1CCCC1</chem>      |
| 208   | <chem>COc1ccc(Br)cc1S(C)(=O)=O</chem>   |
| 209   | <chem>O=C1Cc2cccc3CCCN1c23</chem>       |
| 210   | <chem>Oc1cc[n]c([n]1)N1CCCC1</chem>     |
| 211   | <chem>CCOc1cc[n]c2cccc12</chem>         |
| 212   | <chem>N#Cc1cc(C(O)=O)c(Cl)cc1Cl</chem>  |
| 213   | <chem>N[C@@H](CC1CC1)c1cccc1F</chem>    |
| 214   | <chem>Cc1cccc1C(C)(C)C(O)=O</chem>      |
| 215   | <chem>CC(C)(C)C(N)c1ccc(F)cc1</chem>    |
| 216   | <chem>CC[n]1[n]cc(N)c1C(=O)NC</chem>    |
| 217   | <chem>Cc1[n]c([nH][n]1)C1CCNCC1</chem>  |
| 218   | <chem>CC(C)CN1CC2NOCC2C1</chem>         |
| 219   | <chem>Cc1cc(CC(O)=O)c(F)c[n]1</chem>    |
| 220   | <chem>CSC1=NC(=O)NC2CCCC=21</chem>      |
| 221   | <chem>N#CC1C(=O)NC=C2CCCC2=1</chem>     |
| 222   | <chem>CC(N)c1c[n]2cccc2[n]1</chem>      |
| 223   | <chem>Cc1[n][nH]c(C)c1NC(=O)CC</chem>   |
| 224   | <chem>CC#CCCNC(=O)NC(C)C</chem>         |
| 225   | <chem>NC(=O)c1cc(Br)cc(F)c1F</chem>     |
| 226   | <chem>OCc1ccc2[nH]c[n]c2c1Br</chem>     |
| 227   | <chem>Cc1cc(ccc1F)[C@@H](N)CF</chem>    |
| 228   | <chem>Nc1c(Br)cc(F)cc1C(O)=O</chem>     |
| 229   | <chem>Nc1cc(ccc1O)C(F)(F)F</chem>       |
| 230   | <chem>C=C[C@@H](N)c1cccc(Cl)c1F</chem>  |
| 231   | <chem>COc1[n]cc(Cl)cc1OCC</chem>        |
| 232   | <chem>FC(F)(F)C(F)(F)COC(F)F</chem>     |
| 233   | <chem>CC(C)c1cc(oc1)[C@@H](N)CC</chem>  |
| 234   | <chem>CCOC(=O)C=Cc1cc[s]c1</chem>       |
| 235   | <chem>C[C@@H](CC(O)=O)Sc1ccc[s]1</chem> |
| 236   | <chem>OC1CCc2c(Br)cccc21</chem>         |
| 237   | <chem>NCC(O)c1ccc(O)cc1</chem>          |
| 238   | <chem>COC(=O)c1[n]c(N)cc[n]1</chem>     |
| 239   | <chem>OC(=O)CC1CS(O)(O)CC1</chem>       |
| 240   | <chem>CC(N)(CN)c1cc[n]cc1</chem>        |
| 241   | <chem>Cc1[n]c(COC)[s]c1CO</chem>        |
| 242   | <chem>N[C@@H]1C[C@H]1c1ccc(F)cc1</chem> |
| 243   | <chem>O=C1NCc2ccc(Cl)cc21</chem>        |
| 244   | <chem>CC(=O)c1cc(CC#N)c[s]1</chem>      |
| 245   | <chem>COc1c[n]c(C#N)c(Br)c1</chem>      |
| 246   | <chem>COc1cc(CO)ccc1Br</chem>           |
| 247   | <chem>NCCC1CS(=O)(=O)CC1</chem>         |
| 248   | <chem>CC[n]1cc[n]c1NCC</chem>           |
| 249   | <chem>COc1[n]cc(Br)cc1O</chem>          |
| 250   | <chem>Oc1c(F)cc(Cl)cc1F</chem>          |
| 251   | <chem>CC1CNCC(CO)O1</chem>              |
| 252   | <chem>CC(C)[C@@H]1CNCCN1</chem>         |
| 253   | <chem>Cc1cc[n](CCO)[n]1</chem>          |
| 254   | <chem>CNCC(O)C(F)(F)F</chem>            |
| 255   | <chem>Cc1[s]c(C)cc1CN</chem>            |
| 256   | <chem>Fc1c[n]cc(Cl)c1F</chem>           |
| 257   | <chem>Oc1ccc(Br)c1F</chem>              |

**Table S7.** Canonical SMILES for the 257 randomly-selected compounds from the eMolecules Database.

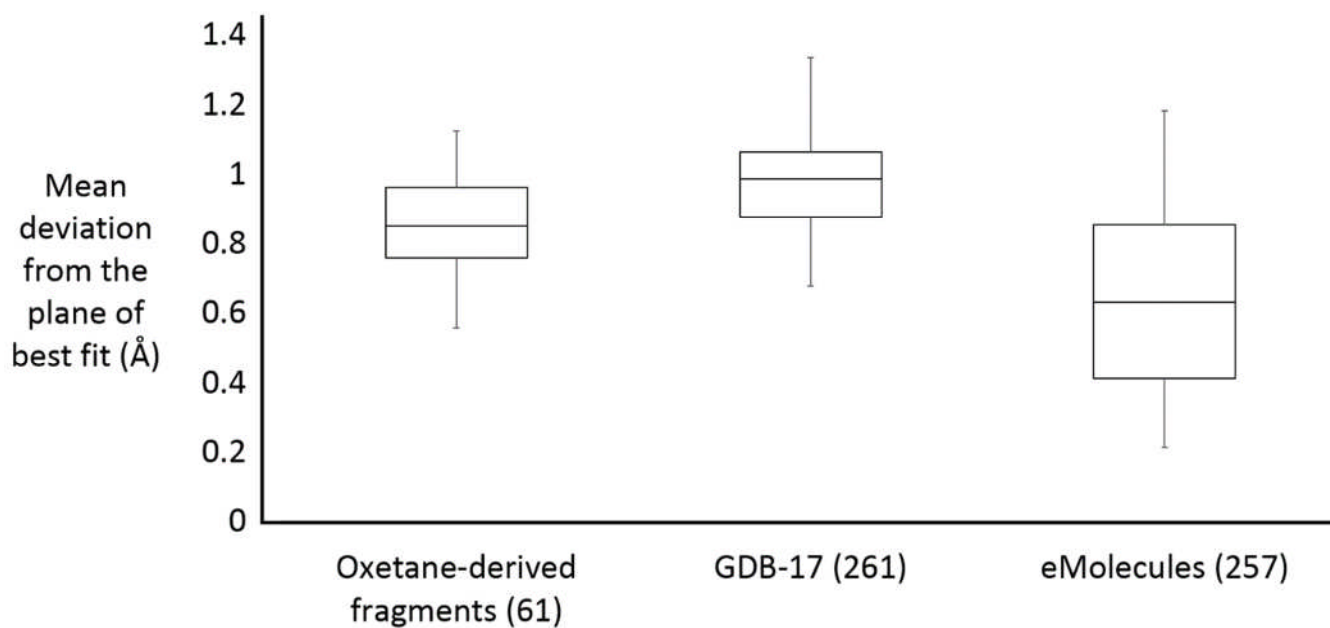

**Figure S28.** Box and whisker plots to show the deviation from the plane of best fit<sup>[2]</sup> for the fragments derived from oxetanes **17a-e**, versus the randomly selected, fragment-like, compounds from the GDB-17 and eMolecules databases. The range of values is shown (bar) together with median, first and third quartile values (box).

## 2.7.1 Substructure filters

Structural filtering was performed by interrogating two sets of SMARTS definitions using the substructure search tool within Pipeline Pilot. The first set contained 240 definitions (Table S8) as compiled by Shoichet, Simeonev *et al.* and used at the NIH Chemical Genomics Centre.<sup>[3]</sup> The second set contained 36 definitions (Table S9) and are examples from the 'GSKB' filter as described by Churcher *et al.*<sup>[4]</sup> In addition, the structural element of the high throughput screening filter embedded in Pipeline Pilot was also used, which comprises the filters for undesirable functionality outlined in Table S10.

| Filter                  | SMARTS                                                                                                                                                                                                         |
|-------------------------|----------------------------------------------------------------------------------------------------------------------------------------------------------------------------------------------------------------|
| 2,3,4-trihydroxyphenyl  | c([OH])c([OH])c([OH])                                                                                                                                                                                          |
| 2,4,5-trihydroxyphenyl  | c([OH])c([OH])cc([OH])                                                                                                                                                                                         |
| 2halo_pyrazine_3EWG     | [#7;R1]1[#6]([F,Cl,Br,I])[#6]([\$(S(=O)(=O)),\$(C(F)(F)(F)),\$(C#N),\$\$(N(=O)(=O)),\$([N+](=O)[O-]),\$(C=O)))[#7][#6][#6]1                                                                                    |
| 2halo_pyrazine_5EWG     | [#7;R1]1[#6]([F,Cl,Br,I])[#6;!\$(c-N)][#7][#6]([\$(S(=O)(=O)),\$(C(F)(F)(F)),\$(C#N),\$\$(N(=O)(=O)),\$([N+](=O)[O-]),\$(C=O)))[#6;!\$(c-N)]1                                                                  |
| 2halo_pyridazine_3EWG   | [#7;R1]1[#6]([F,Cl,Br,I])[#6]([\$(S(=O)(=O)),\$(C(F)(F)(F)),\$(C#N),\$\$(N(=O)(=O)),\$([N+](=O)[O-]),\$(C=O)))[#6][#6][#7]1                                                                                    |
| 2halo_pyridazine_5EWG   | [#7;R1]1[#6]([F,Cl,Br,I])[#6][#6][#6]([\$(S(=O)(=O)),\$(C(F)(F)(F)),\$(C#N),\$\$(N(=O)(=O)),\$([N+](=O)[O-]),\$(C=O)))[#7]1                                                                                    |
| 2halo_pyridine_3EWG     | [#7;R1]1[#6;!\$(c=O)]([F,Cl,Br,I])[#6]([\$(S(=O)(=O)),\$(C(F)(F)(F)),\$(C#N),\$\$(N(=O)(=O)),\$([N+](=O)[O-]),\$(C=O)))[#6;!\$(c-N)][#6][#6;!\$(c-N)]1                                                         |
| 2halo_pyridine_5EWG     | [#7;R1]1[#6;!\$(c=O)]([F,Cl,Br,I])[#6][#6;!\$(c-N)][#6]([\$(S(=O)(=O)),\$(C(F)(F)(F)),\$(C#N),\$\$(N(=O)(=O)),\$([N+](=O)[O-]),\$(C=O)))[#6;!\$(c=O);!\$(c-N)]1                                                |
| 2halo_pyrimidine_5EWG   | [#7;R1]1[#6]([F,Cl,Br,I])[#7][#6][#6]([\$(S(=O)(=O)),\$(C(F)(F)(F)),\$(C#N),\$\$(N(=O)(=O)),\$([N+](=O)[O-]),\$(C=O)))[#6]1                                                                                    |
| 2-Halopyridine          | [F,Cl,Br]-c1n[c,n][c,n][c,n]1                                                                                                                                                                                  |
| 3halo_pyridazine_2EWG   | [#7;R1]1[#6]([\$(S(=O)(=O)),\$(C(F)(F)(F)),\$(C#N),\$\$(N(=O)(=O)),\$([N+](=O)[O-]),\$(C=O)))[#6]([F,Cl,Br,I])[#6][#6][#7]1                                                                                    |
| 3halo_pyridazine_4EWG   | [#7;R1]1[#6][#6]([F,Cl,Br,I])[#6]([\$(S(=O)(=O)),\$(C(F)(F)(F)),\$(C#N),\$\$(N(=O)(=O)),\$([N+](=O)[O-]),\$(C=O)))[#6][#7]1                                                                                    |
| 4_pyridone_3_5_EWG      | [#7,#8,#16]1~[#6;H]~[#6]([\$(S(=O)(=O)),\$(C(F)(F)(F)),\$(C#N),\$\$(N(=O)(=O)),\$([N+](=O)[O-]),\$(C=O)))[#6](=O)~[#6]([\$(S(=O)(=O)),\$(C(F)(F)(F)),\$(C#N),\$\$(N(=O)(=O)),\$([N+](=O)[O-]),\$(C=O)))[#6;H]1 |
| 4halo_pyridine_3EWG     | [#7;R1]1[#6;!\$(c=O);!\$(c-N)][#6]([\$(S(=O)(=O)),\$(C(F)(F)(F)),\$(C#N),\$\$(N(=O)(=O)),\$([N+](=O)[O-]),\$(C=O)))[#6]([F,Cl,Br,I])[#6][#6;!\$(c=O);!\$(c-N)]1                                                |
| 4halo_pyrimidine_2_6EWG | [#7]1[#6]([\$(S(=O)(=O)),\$(C(F)(F)(F)),\$(C#N),\$\$(N(=O)(=O)),\$([N+](=O)[O-]),\$(C=O)))[#7;R1][#6]([F,Cl,Br,I])[#6][#6]1([\$(S(=O)(=O)),\$(C(F)(F)(F)),\$(C#N),\$\$(N(=O)(=O)),\$([N+](=O)[O-]),\$(C=O))    |
| 4halo_pyrimidine_5EWG   | [#7]1[#6][#7;R1][#6]([F,Cl,Br,I])[#6]([\$(S(=O)(=O)),\$(C(F)(F)(F)),\$(C#N),\$\$(N(=O)(=O)),\$([N+](=O)[O-]),\$(C=O)))[#6]1                                                                                    |
| acetal                  | [#6]-O[CH1](-[#6])O[#6]                                                                                                                                                                                        |
| acid_halide             | [S,C](=[O,S])[F,Br,Cl,I]                                                                                                                                                                                       |
| acrylate                | [CH2]=[C;!\$(C-N);!\$(C-O)]C(=O)                                                                                                                                                                               |
| activated_4mem_ring     | [#6]1~[\$(C(=O)),\$(S(=O))]-[O,S,N]~[\$(C(=O)),\$(S(=O))]1                                                                                                                                                     |
| activated_acetylene     | [\$(S(=O)(=O)),\$(C(F)(F)(F)),\$(C#N),\$\$(N(=O)(=O)),\$([N+](=O)[O-]),\$(C=O)]C#[C;!\$(C-N);!\$(C-n)]                                                                                                         |

| Filter                         | SMARTS                                                                                                                                                                           |
|--------------------------------|----------------------------------------------------------------------------------------------------------------------------------------------------------------------------------|
| activated_diazo                | [N;!R]([\$(S(=O)(=O)),\$(C(F)(F)(F)),\$(C#N),\$ (N(=O)(=O)),\$([N+](=O)[O-]),\$(C(=O)))=[N;!R]([\$(S(=O)(=O)),\$(C(F)(F)(F)),\$(C#N),\$ (N(=O)(=O)),\$([N+](=O)[O-]),\$(C(=O))]) |
| activated_S#O_3_ring           | C1-[O,S]-[C,N,O,S]1[a,N,O,S]                                                                                                                                                     |
| activated_vinyl_ester          | O=COC=[\$(C(S(=O)(=O)),\$(C(C(F)(F)(F)),\$(C(C#N)),\$(C(N(=O)(=O)),\$(C([N+](=O)[O-]),\$(C(C(=O)))!\$(C(N))                                                                      |
| activated_vinyl_sulfonate      | O(-S(=O)(=O))C=[\$(C(S(=O)(=O)),\$(C(C(F)(F)(F)),\$(C(C#N)),\$(C(N(=O)(=O)),\$(C([N+](=O)[O-]),\$(C(C(=O)))!\$(C(N))                                                             |
| acyclic_imide                  | [C,c][C;!R](=O)[N;!R][C;!R](=O)[C,c]                                                                                                                                             |
| acyl_123_triazole              | [#7;R1]1~[#7;R1]~[#7;R1](-C(=O))~[#6]~[#6]1                                                                                                                                      |
| acyl_134_triazole              | [#7]1~[#7]~[#6]~[#7](-C(=O)[!N])~[#6]1                                                                                                                                           |
| acyl_activated_NO              | O=C(![N])O[\$(#7;+),\$ (N(C=[O,S,N])(C=[O,S,N]))]                                                                                                                                |
| acyl_cyanide                   | C(=O)-C#N                                                                                                                                                                        |
| acyl_imidazole                 | [C;!\$(C-N)](=O)[#7]1[#6;H1,\$(#6)([*;!R])][#7][#6;H1,\$(#6)([*;!R])][#6;H1,\$(#6)([*;!R])][#7]1                                                                                 |
| acyl_pyrazole                  | [C;!\$(C-N)](=O)[#7]1[#7][#6;H1,\$(#6)([*;!R])][#6;H1,\$(#6)([*;!R])][#6;H1,\$(#6)([*;!R])][#7]1                                                                                 |
| aldehyde                       | [C,c][C;H1](=O)                                                                                                                                                                  |
| aliphatic_chain_6              | [CD2;R0][CD2;R0][CD2;R0][CD2;R0][CD2;R0][CD2;R0]                                                                                                                                 |
| alkynyl_michael_acceptor1      | [#6]-C#CC(=O)-[#6,#7,#8]                                                                                                                                                         |
| alkynyl_michael_acceptor2      | [CH1]#CC(=O)-[#6,#7,#8]                                                                                                                                                          |
| allene                         | *=C=*                                                                                                                                                                            |
| alpha_dicarbonyl               | C(=O)!@C(=O)                                                                                                                                                                     |
| alpha_halo_amine               | [F,Cl,Br,I,\$(O(S(=O)(=O)))]-[CH,CH2!\$(CF2)]-[N,n]                                                                                                                              |
| alpha_halo_carbonyl            | C(=O)([CH,CH2][Cl,Br,I,\$(O(S(=O)(=O)))]                                                                                                                                         |
| alpha_halo_EWG                 | [\$(C(F)(F)(F)),\$(C#N),\$ (N(=O)(=O)),\$([N+](=O)[O-])]-[CH,CH2]-[Cl,Br,I,\$(O(S(=O)(=O)))]                                                                                     |
| alpha_halo_heteroatom          | [N,n,O,S!\$(S(=O)(=O))]-[CH,CH2!\$(CF2)][F,Cl,Br,I,\$(O(S(=O)(=O)))]                                                                                                             |
| alpha_halo_heteroatom_tert     | [N,n,O,S!\$(S(=O)(=O))]-C([Cl,Br,I,\$(O(S(=O)(=O)))])(C(C)                                                                                                                       |
| anhydride                      | [\$(C(=O)),\$(C(=S))]-[O,S]-[\$(C(=O)),\$(C(=S)),\$(C(=[N;!R])),\$(C(=[N-](C;X4)))]                                                                                              |
| aromatic_azide_c               | N=[N+]=[N-]                                                                                                                                                                      |
| aryl_phosphonate               | P(=O)-[O;!R]-a                                                                                                                                                                   |
| aryl_thiocarbonyl              | a-[S;X2;!R]-[C;!R](=O)                                                                                                                                                           |
| azide                          | [\$(N#[N+]-[N-]),\$([N-]=[N+]=N)]                                                                                                                                                |
| aziridine_diazirine            | [C,N]1~[C,N]~N~1                                                                                                                                                                 |
| azo_amino                      | [N]=[N;!R]-[N]                                                                                                                                                                   |
| azo_aryl                       | c[N;!R;!+]=[N;!R;!+]-c                                                                                                                                                           |
| azo_filter1                    | [N;!R]=[N;!R]-[N]=[*]                                                                                                                                                            |
| azo_filter2                    | [N;!\$(N-S(=O)(=O))!\$(N-C=O)]-[N;!r3!\$(N-S(=O)(=O))!\$(N-C=O)]-[N;!\$(N-S(=O)(=O))!\$(N-C=O)]                                                                                  |
| azo_filter3                    | [N;!R]-[N;!R]-[N;!R]                                                                                                                                                             |
| azo_filter4                    | a-N=N-[N;H2]                                                                                                                                                                     |
| azoalkanal                     | [N;R0]=[N;R0]CC=O                                                                                                                                                                |
| azocyanamide                   | [N;R0]=[N;R0]C#N                                                                                                                                                                 |
| bad_boron                      | [B-,BH2,BH3,\$(B(F)(F))]                                                                                                                                                         |
| bad_cations                    | [C+,F+,Cl+,Br+,I+,Se+]                                                                                                                                                           |
| b-carbonyl_quaternary_nitrogen | C(=O)CC[N+,n+]                                                                                                                                                                   |
| benzhydrol                     | [OH1]-C(-c1cccc1)-c2cccc2                                                                                                                                                        |
| benzidine_like                 | c([N;!+])1ccc(c2ccc([N;!+])cc2)cc1                                                                                                                                               |
| benzylic-quaternary_nitrogen   | cC[N+]                                                                                                                                                                           |
| beta_lactam                    | C1(=O)-[#6]~[#6]N1                                                                                                                                                               |
| beta_lactone                   | [#6,#15,#16]1(=O)~[#6]~[#6]~[#8,#16]1                                                                                                                                            |
| betalactam_EWG                 | C1(=O)-[#6]~[#6]N1([\$(S(=O)(=O))[C,c,O&D2]),\$(C(F)(F)(F)),\$(C#N),\$ (N(=O)(=O)),\$([N+](=O)[O-                                                                                |



| Filter                        | SMARTS                                                                                                                                                                                                                                                                                                                                                                                                                                                                                                                                                                                         |
|-------------------------------|------------------------------------------------------------------------------------------------------------------------------------------------------------------------------------------------------------------------------------------------------------------------------------------------------------------------------------------------------------------------------------------------------------------------------------------------------------------------------------------------------------------------------------------------------------------------------------------------|
| halo_imino                    | C(=[#7])([Cl,Br,I,\$(O(S(=O)(=O)))]))                                                                                                                                                                                                                                                                                                                                                                                                                                                                                                                                                          |
| halo_olefin_bis_EWG           | C([Cl,Br,I,\$(O(S(=O)(=O)))])=C([\$(S(=O)(=O)),\$(C(F)(F)(F)),\$(C#N),\$ (N(=O)(=O)),\$([N+](=O)[O-]),\$(C=O)])([\$(S(=O)(=O)),\$(C(F)(F)(F)),\$(C#N),\$ (N(=O)(=O)),\$([N+](=O)[O-]),\$(C=O)])                                                                                                                                                                                                                                                                                                                                                                                                |
| halo_phenolic_carbonyl        | C(=O)Oc1c([Cl,F])[cH1,\$(c[F,Cl])c([F,Cl])[cH1,\$(c[F,Cl])c1([F,Cl])                                                                                                                                                                                                                                                                                                                                                                                                                                                                                                                           |
| halo_phenolic_sulfonyl        | S(=O)Oc1c([Cl,F])[cH1,\$(c[F,Cl])c([F,Cl])[cH1,\$(c[F,Cl])c1([F,Cl])                                                                                                                                                                                                                                                                                                                                                                                                                                                                                                                           |
| halogen_heteroatom            | [!C;!c;!H][F,Cl,Br,I]                                                                                                                                                                                                                                                                                                                                                                                                                                                                                                                                                                          |
| hemiacetal                    | [#6]-O[CH1](-[#6])[OH1]                                                                                                                                                                                                                                                                                                                                                                                                                                                                                                                                                                        |
| hetero_silyl                  | [Si]~[#6]                                                                                                                                                                                                                                                                                                                                                                                                                                                                                                                                                                                      |
| heteroaryl_sulfonate          | a-S(=O)(=O)-O-[\$([a&!#6]),\$(c[a&!#6]),\$(cc[a&!#6]),\$(ccc[a&!#6]),\$(ccccc[a&!#6])]                                                                                                                                                                                                                                                                                                                                                                                                                                                                                                         |
| HOBT_ester                    | O=C(-[!N])O[\$(nnn),\$(#[7]-[7]=[7])]                                                                                                                                                                                                                                                                                                                                                                                                                                                                                                                                                          |
| hydrazine2                    | [#7]!@-N!@=C                                                                                                                                                                                                                                                                                                                                                                                                                                                                                                                                                                                   |
| hydrazine                     | [N;X3;!\$(N-S(=O)(=O));!\$(N-C(F)(F)(F));!\$(N-C#N);!\$(N-C(=O));!\$(N-C(=S));!\$(N-C(=N))]-[N;X3;!\$(N-S(=O)(=O));!\$(N-C(F)(F)(F));!\$(N-C#N);!\$(N-C(=O));!\$(N-C(=S));!\$(N-C(=N))]                                                                                                                                                                                                                                                                                                                                                                                                        |
| hydrazothiourea               | [N;!R]=NC(=S)N                                                                                                                                                                                                                                                                                                                                                                                                                                                                                                                                                                                 |
| hydroxamate_wAr-Head          | C([N;H1]([O;D1]))=O                                                                                                                                                                                                                                                                                                                                                                                                                                                                                                                                                                            |
| hyperval_sulfur               | [\$([#16&D3]),\$(#[16&D4])]=.[#6]                                                                                                                                                                                                                                                                                                                                                                                                                                                                                                                                                              |
| Imine1                        | [#6;R0]C([#6;R0])=[NH1]                                                                                                                                                                                                                                                                                                                                                                                                                                                                                                                                                                        |
| Imine2                        | [#6;R0][CH1]=[NH1]                                                                                                                                                                                                                                                                                                                                                                                                                                                                                                                                                                             |
| isonitrile                    | [N+]#[C-]                                                                                                                                                                                                                                                                                                                                                                                                                                                                                                                                                                                      |
| Lawesson_reagent_derivatives  | P(=S)(S)S                                                                                                                                                                                                                                                                                                                                                                                                                                                                                                                                                                                      |
| linear_polycyclic_aromatic_I  | [\$(a12aaaaa1aa3a(aa(aaaa4)a4a3)a2),\$(a12aaaaa1aa3a(aaa4a3aaaa4)a2),\$(a12aaaaa1a(aa5)a3a(aaa4a3a5aaa4)a2)]                                                                                                                                                                                                                                                                                                                                                                                                                                                                                   |
| linear_polycyclic_aromatic_II | [\$(a12aaaa4a1a3a(aaaa3aa4)aa2),\$(a12aaaaa1a3a(aaa4a3aaaa4)aa2),\$(a1(a(aaaa4)a4a3a2aaaa3)a2aaaa1)]                                                                                                                                                                                                                                                                                                                                                                                                                                                                                           |
| maleimide_etc                 | [\$([C;H1]),\$(C(-[F,Cl,Br,I]))]1=[\$([C;H1]),\$(C(-[F,Cl,Br,I]))]C(=O)[N,O,S]C(=O)1                                                                                                                                                                                                                                                                                                                                                                                                                                                                                                           |
| meldrums_acid_etc             | O=C1OC(C)(C)OC(C1)=O                                                                                                                                                                                                                                                                                                                                                                                                                                                                                                                                                                           |
| metal                         | [\$([Ru]),\$([Mg]),\$([Rh]),\$([Se]),\$([Ise]),\$([Pd]),\$([Sc]),\$([Bi]),\$([Sb]),\$([Ag]),\$([Ti]),\$([Al]),\$([Cd]),\$([V]),\$([In]),\$([Cr]),\$([Sn]),\$([Mn]),\$([La]),\$([Fe]),\$([Er]),\$([Tm]),\$([Yb]),\$([Lu]),\$([Hf]),\$([Ta]),\$([W]),\$([Re]),\$([Co]),\$([Os]),\$([Ni]),\$([Ir]),\$([Cu]),\$([Zn]),\$([Ga]),\$([Ge]),\$([As]),\$([as]),\$([Y]),\$([Zr]),\$([Nb]),\$([Ce]),\$([Pr]),\$([Nd]),\$([Sm]),\$([Eu]),\$([Gd]),\$([Tb]),\$([Dy]),\$([Ho]),\$([Pt]),\$([Au]),\$([Hg]),\$([Tl]),\$([Pb]),\$([Ac]),\$([Th]),\$([Pa]),\$([Mo]),\$([U]),\$([Tc]),\$([Te]),\$([Po]),\$([At])] |
| michael_acceptor6             | [#6,#7]-&!@[#6](=&!@[CH])-&!@C(=O)-&!@[C,N,O,S]                                                                                                                                                                                                                                                                                                                                                                                                                                                                                                                                                |
| michael_acceptor5             | N#CC(=C)C#N                                                                                                                                                                                                                                                                                                                                                                                                                                                                                                                                                                                    |
| michael_acceptor_misc         | O=C1[O,N]C~[N,C]C1=[C,N]                                                                                                                                                                                                                                                                                                                                                                                                                                                                                                                                                                       |
| michael_acceptor_misc2        | *~\C=C1/CC2=CC=CC=C2N1                                                                                                                                                                                                                                                                                                                                                                                                                                                                                                                                                                         |
| michael_acceptor_vinyl2       | [CH2]=C-C(=O)-[#6,#7,#8]                                                                                                                                                                                                                                                                                                                                                                                                                                                                                                                                                                       |
| misc_10_carbon_sb_chain       | [C;!R]-[C;!R]-[C;!R]-[C;!R]-[C;!R]-[C;!R]-[C;!R]-[C;!R]-[C;!R]-[C;!R]-[C;!R]                                                                                                                                                                                                                                                                                                                                                                                                                                                                                                                   |
| misc_2_free_phos              | P([O;D1])=O.P([O;D1])=O                                                                                                                                                                                                                                                                                                                                                                                                                                                                                                                                                                        |
| misc_2_N_quats                | [N,n;H0;+;!\$(N~O);!\$(n~O)].[N,n;H0;+;!\$(N~O);!\$(n~O)]                                                                                                                                                                                                                                                                                                                                                                                                                                                                                                                                      |
| misc_2_sulfonic_acid          | [C,c]S(=O)(=O)[O;D1].[C,c]S(=O)(=O)[O;D1]                                                                                                                                                                                                                                                                                                                                                                                                                                                                                                                                                      |
| misc_3_COOH                   | C(=O)[O;D1].C(=O)[O;D1].C(=O)[O;D1]                                                                                                                                                                                                                                                                                                                                                                                                                                                                                                                                                            |
| misc_3_iodine                 | [#53].[#53].[#53]                                                                                                                                                                                                                                                                                                                                                                                                                                                                                                                                                                              |
| misc_4_basic_N                | [N;!\$(N(=[N,O,S,C]));!\$(N(S(=O)(=O)));!\$(N(C(F)(F)(F)));!\$(N(C#N));!\$(N(C(=O)));!\$(N(C(=S)));!\$(N(C(=N))];!\$(N(#C));!\$(N-c);.[N;!\$(N(=[N,O,S,C]));!\$(N(S(=O)(=O)));!\$(N(C(F)(F)(F)));!\$(N(C#N));!\$(N(C(=O)));!\$(N(C(=S))];!\$(N(C(=N))];!\$(N(#C));!\$(N-c);.[N;!\$(N(=[N,O,S,C]));!\$(N(S(=O)(=O)));!\$(N(C(F)(F)(F)));!\$(N(C#N));!\$(N(C(=O))];!\$(N(C(=S))];!\$(N(C(=N))];!\$(N(#C));!\$(N-c);.[N;!\$(N(=[N,O,S,C]));!\$(N(S(=O)(=O))];!\$(N(C(F)(F)(F))];!\$(N(C#N));!\$(N(C(=O))];!\$(N(C(=S))];!\$(N(C(=N))]                                                             |



| Filter                     | SMARTS                                                                                                                                                                                                       |
|----------------------------|--------------------------------------------------------------------------------------------------------------------------------------------------------------------------------------------------------------|
|                            | !\$(N(#C));!\$(N-c)                                                                                                                                                                                          |
| misc_4_nitro               | [\$([N+](=O)[O-]),\$(N(=O)=O)].[\$([N+](=O)[O-]),\$(N(=O)=O)].[\$([N+](=O)[O-]),\$(N(=O)=O)].[\$([N+](=O)[O-]),\$(N(=O)=O)]                                                                                  |
| misc_5_phenolic_OH         | a[O;D1].a[O;D1].a[O;D1].a[O;D1].a[O;D1]                                                                                                                                                                      |
| misc_7_aliphatic_OH        | C[O;D1].C[O;D1].C[O;D1].C[O;D1].C[O;D1].C[O;D1].C[O;D1]                                                                                                                                                      |
| misc_7_total_hal           | [Cl,Br,I].[Cl,Br,I].[Cl,Br,I].[Cl,Br,I].[Cl,Br,I].[Cl,Br,I].[Cl,Br,I].[Cl,Br,I]                                                                                                                              |
| misc_8_CF2_or_CH2          | [CH2,\$(CF2);R0][CH2,\$(CF2);R0][CH2,\$(CF2);R0][CH2,\$(CF2);R0][CH2,\$(CF2);R0][CH2,\$(CF2);R0][CH2,\$(CF2);R0][CH2,\$(CF2);R0]                                                                             |
| monensin                   | O1CCCCC1C2CCCO2                                                                                                                                                                                              |
| monofluoroacetate          | [C;H2](F)C(=O)[O,N,S]                                                                                                                                                                                        |
| nitrate                    | [#6]-O-[N+](=O)[O-]                                                                                                                                                                                          |
| nitro_aromatic             | (a-[N+](=O)[O-].a-[N+](=O)[O-])                                                                                                                                                                              |
| nitroalkane                | C[N+](=O)[O-]                                                                                                                                                                                                |
| nitrone                    | [C;!R]=[N+][O;D1]                                                                                                                                                                                            |
| nitrosamine                | N-[N;X2](=O)                                                                                                                                                                                                 |
| nitroso                    | [N&D2](=O)                                                                                                                                                                                                   |
| NO_phosphonate             | P(=O)ON                                                                                                                                                                                                      |
| ortho_hydroiminoquinone    | c1c([N;D1])c([N;D1])c[cH1][cH1]1                                                                                                                                                                             |
| ortho_hydroquinone         | a1c([O,S;D1])c([O,S;D1])a[cH1][cH1]1                                                                                                                                                                         |
| ortho_nitrophenyl_carbonyl | [#6]1(-O-[C;!R](-[N]([N+](=O)[O-])))[#6]([N+](=O)[O-])[\$([N+](=O)[O-])][#6][#6][#6]1                                                                                                                        |
| ortho_quinone              | [CH1,\$(C(-[Cl,Br,I]))]1=CC(=[O,N,S;!R])C(=[O,N,S])C=[CH1,\$(C(-[Cl,Br,I]))]1                                                                                                                                |
| oxaziridine                | C1~[O,S]~N1                                                                                                                                                                                                  |
| oxime                      | [\$(C=N[O;D1]);!\$(C=[N+])][#6][#6]                                                                                                                                                                          |
| oxonium                    | [o+,O+]                                                                                                                                                                                                      |
| P_S_halide                 | [P,S][F,Cl,Br,I]                                                                                                                                                                                             |
| para_hydroiminoquinone     | a1[cH1]c([N;D1])[cH1]ac([N;D1])1                                                                                                                                                                             |
| para_hydroquinone          | a1[cH1]c([O,S;D1])[cH1]ac([O,S;D1])1                                                                                                                                                                         |
| para_nitrophenyl_ester     | [#6]1(-O-[C;!R](-[N]([N+](=O)[O-])))[#6]([N+](=O)[O-])[\$([N+](=O)[O-])][#6][#6][#6]1                                                                                                                        |
| para_quinone               | [CH1,\$(C(-[Cl,Br,I]))]1=[CH1,\$(C(-[Cl,Br,I]))]C(=[O,N,S])[CH1,\$(C(-[Cl,Br,I]))]=[CH1,\$(C(-[Cl,Br,I]))]C1(=[O,N,S])                                                                                       |
| paraquat_like              | [#6]1[#6][#6]([#6]2[#6][#6][#7;+][#6][#6]2)[#6][#6][#7;+]                                                                                                                                                    |
| pentafluorophenylester     | C(=O)Oc1c(F)c(F)c(F)c(F)c1(F)                                                                                                                                                                                |
| perchloro_cp               | C1(Cl)(Cl)C(Cl)C(Cl)=C(Cl)C1(Cl)                                                                                                                                                                             |
| perhalo_dicarbonyl_phenyl  | c1(C=O)c([Br,Cl,I])c([Br,Cl,I])c([Br,Cl,I])c([Br,Cl,I])c1(C=O)                                                                                                                                               |
| perhalo_ketone             | O=CC(-[F,Cl,Br,I])(-[F,Cl,Br,I])-[F,Cl,Br,I]                                                                                                                                                                 |
| perhalo_phenyl             | c1c([F,Br,Cl,I])c([F,Br,Cl,I])c([F,Br,Cl,I])c([F,Br,Cl,I])c1([F,Br,Cl,I])                                                                                                                                    |
| peroxide                   | [#8]-[#8]                                                                                                                                                                                                    |
| phenolate_bis_EWG          | O=[C,S]Oc1aaa(\$(\$S(=O)(=O)),\$(C(F)(F)(F)),\$(C#N),\$(N(=O)=O)),[\$([N+](=O)[O-]),\$(C(=O)O),\$(C(=O)N)])aa(\$(\$S(=O)(=O)),\$(C(F)(F)(F)),\$(C#N),\$(N(=O)=O)),[\$([N+](=O)[O-]),\$(C(=O)O),\$(C(=O)N)])1 |
| phos_serine_wAr-Head       | NC(COP(O)(O)=O)C(O)=O                                                                                                                                                                                        |
| phos_threonine_wAr-Head    | NC(C(C)OP(O)(O)=O)C(O)=O                                                                                                                                                                                     |
| phos_tyrosine_wAr-Head     | NC(Cc1ccc(OP(O)(O)=O)cc1)C(O)=O                                                                                                                                                                              |
| phosphite                  | [c,C]-[P;v3]                                                                                                                                                                                                 |
| phosphonate_esters         | COP(=O)(=O)[C,c]                                                                                                                                                                                             |
| phosphonium                | [#15;+]-[O]                                                                                                                                                                                                  |
| phosphoramidate            | NP(=O)(N)N                                                                                                                                                                                                   |
| phosphorane                | C=P                                                                                                                                                                                                          |

| Filter                     | SMARTS                                                                                                                        |
|----------------------------|-------------------------------------------------------------------------------------------------------------------------------|
| phosphorous_nitrogen_bond  | [#15]~[N,n]                                                                                                                   |
| phosphorus_phosphorus_bond | P~P                                                                                                                           |
| phosphorus_sulfur_bond     | P~S                                                                                                                           |
| polyacidic4                | [C,S,P](=O)[OH].[C,S,P](=O)[OH].[C,S,P](=O)[OH].[C,S,P](=O)[OH]                                                               |
| polyazoanthracene          | c12:[c,n]:[c,n]:[c,n]:c1[c,n]c3:[c,n]:[c,n]:[c,n]:c3[c,n]2                                                                    |
| polyazophenanthrene        | c12:[c,n]:[c,n]:[c,n]:c1:[c,n]:[c,n]:c3:[c,n]:[c,n]:[c,n]:c23                                                                 |
| polyene                    | C=[C;!R][C;!R]=[C;!R][C;!R]=[C;!R]                                                                                            |
| polyhalo_phenol_a          | c1c([O;D1])c(-[Cl,Br,I])c(-[Cl,Br,I])cc1.c1c([O;D1])c(-[Cl,Br,I])c(-[Cl,Br,I])cc1                                             |
| polyhalo_phenol_b          | c1c([O;D1])c(-[Cl,Br,I])cc(-[Cl,Br,I])c1.c1c([O;D1])c(-[Cl,Br,I])cc(-[Cl,Br,I])c1                                             |
| polyhalo_phenol_c          | c1c([O;D1])ccc(-[Cl,Br,I])c(-[Cl,Br,I])1.c1c([O;D1])ccc(-[Cl,Br,I])c(-[Cl,Br,I])1                                             |
| polyhalo_phenol_d          | c(-[Cl,Br,I])1c([O;D1])c(-[Cl,Br,I])ccc1.c(-[Cl,Br,I])1c([O;D1])c(-[Cl,Br,I])ccc1                                             |
| polyhalo_phenol_e          | c1c([O;D1])ccc(-[Cl,Br,I])c(-[Cl,Br,I])1.c1c([O;D1])ccc(-[Cl,Br,I])c(-[Cl,Br,I])1                                             |
| polysulfide                | [S;D2]-[S;D2]-[S;D2]                                                                                                          |
| porphyrin                  | [#6;r16,r17,r18]~[#6]1~[#6]~[#6]~[#6]~[#6]~[#6]~[#6]1                                                                         |
| primary_halide_sulfate     | [CH2][Cl,Br,I,\$(O(S(=O)(=O)![N];![O&D1]))]                                                                                   |
| propiolactone              | C1(=O)OCC1                                                                                                                    |
| quat_N_acyl                | [N,n;+!>@C(=O)                                                                                                                |
| quat_N_N                   | [N,n;R;+!>@[N,n]                                                                                                              |
| quaternary_C_Cl_I_P_S      | [C+,Cl+,I+,P+,S+]                                                                                                             |
| quaternary_nitroxy         | C[N+]-([O-])(C)C                                                                                                              |
| quinone_methide            | [#6;!\$([#6](-[N,O,S]))]1=[#6;!\$([#6](-[N,O,S]))][#6](-[#6])[#6;!\$([#6](-[N,O,S]))]=[#6;!\$([#6](-[N,O,S]))][#6]1(=[O,N,S]) |
| rhodanine                  | C(=C)1SC(=S)NC(=O)1                                                                                                           |
| secondary_halide_sulfate   | [CH;!\$(C=C)][Cl,Br,I,\$(O(S(=O)(=O)![N];![O&D1]))]                                                                           |
| squalestatin               | C12OCCCC(O1)CC2                                                                                                               |
| sulf_D2_nitrogen           | [S;D2](-[N;!\$(N(=C));!\$(N(-S(=O)(=O))];!\$(N(-C(=O))))]                                                                     |
| sulf_D2_oxygen_D2          | [S;D2][O;D2]                                                                                                                  |
| sulf_D3_nitrogen           | [S;D3](-N)(-c,C)(-c,C)                                                                                                        |
| sulfite_sulfate_ester      | [C,c]OS(=O)O[C,c]                                                                                                             |
| sulfonate                  | COS(=O)(=O)[C,c]                                                                                                              |
| sulfonium                  | [S+;X3;\$S-C];!\$(S-[O;D1])]                                                                                                  |
| sulfonyl_anhydride         | [\$(C(=O)),\$(S(=O)(=O))][O,S](S(=O)(=O))                                                                                     |
| sulfonyl_halide            | S(=O)(=O)[F,Cl,Br,I]                                                                                                          |
| sulfonyl_heteroatom        | [!#6;!#1;!#11;!#19]O(S(=O)(=O)(-c,c))                                                                                         |
| sulphonyl_cyanide          | S(=O)(=O)C#N                                                                                                                  |
| tertiary_halide_sulfate    | [C;X4](-[Cl,Br,I,\$(O(S(=O)(=O)![N];![O&D1]))])(-c,C)(-c,C)(-c,C)                                                             |
| thio_hydroxamate           | [S;D2]([\$(N(=C)),\$(N(-S(=O)(=O))),\$(N(-C(=O))))]                                                                           |
| thio_xanthate              | [S;!R]-[C;!R](=[S;!R])(-[S;!R])                                                                                               |
| thioamide                  | [#6]C([#7H2])=S                                                                                                               |
| thiocarbonate              | SC(=O)[O,S]                                                                                                                   |
| thiocyanate                | SC#N                                                                                                                          |
| thioester                  | [S;!R;H0]C(=[S,O;!R])([O;!S;!N])                                                                                              |
| thioketone                 | CC(=S)C                                                                                                                       |
| thiol_wAr-Head             | NC(C[S;D1])C(O)=O                                                                                                             |
| thiopyrylium               | c1[S,s;+]cccc1                                                                                                                |
| thiosulfoxide              | [C,c][S;X3](-O)-S                                                                                                             |
| thiourea                   | C([#7H2])([#7H2])=S                                                                                                           |
| tri_phosphoric_esters      | ([#6]OP(=O)(-*)O[#6].[#6]OP(=O)(-*)O[#6].[#6]OP(=O)(-*)O[#6])                                                                 |

| Filter                     | SMARTS                                                                                                                                                                                                                                                                                                                                                                                                                                                                                                                                                                                                                                                                                                                                                                                                                                                                                                                                                                                                                                                                                                                                                                                                                                                     |
|----------------------------|------------------------------------------------------------------------------------------------------------------------------------------------------------------------------------------------------------------------------------------------------------------------------------------------------------------------------------------------------------------------------------------------------------------------------------------------------------------------------------------------------------------------------------------------------------------------------------------------------------------------------------------------------------------------------------------------------------------------------------------------------------------------------------------------------------------------------------------------------------------------------------------------------------------------------------------------------------------------------------------------------------------------------------------------------------------------------------------------------------------------------------------------------------------------------------------------------------------------------------------------------------|
| triacyloxime               | C(=O)N(C(=O))OC(=O)                                                                                                                                                                                                                                                                                                                                                                                                                                                                                                                                                                                                                                                                                                                                                                                                                                                                                                                                                                                                                                                                                                                                                                                                                                        |
| triamide                   | [\$(N-C(=O))(-C(=O))(-C(=O)),\$(n([#6](=O))([#6](=O))([#6](=O)))]                                                                                                                                                                                                                                                                                                                                                                                                                                                                                                                                                                                                                                                                                                                                                                                                                                                                                                                                                                                                                                                                                                                                                                                          |
| triaryl_phosphine_oxide    | P(=O)(a)(a)(a)                                                                                                                                                                                                                                                                                                                                                                                                                                                                                                                                                                                                                                                                                                                                                                                                                                                                                                                                                                                                                                                                                                                                                                                                                                             |
| trichloromethyl_ketone     | [\$(C(=O));!\$(C-N);!\$(C-O);!\$(C-S)]C(Cl)(Cl)(Cl)                                                                                                                                                                                                                                                                                                                                                                                                                                                                                                                                                                                                                                                                                                                                                                                                                                                                                                                                                                                                                                                                                                                                                                                                        |
| triflate                   | OS(=O)(=O)(C(F)(F)(F))                                                                                                                                                                                                                                                                                                                                                                                                                                                                                                                                                                                                                                                                                                                                                                                                                                                                                                                                                                                                                                                                                                                                                                                                                                     |
| trifluoroacetate_ester     | C(F)(F)(F)C(=O)O                                                                                                                                                                                                                                                                                                                                                                                                                                                                                                                                                                                                                                                                                                                                                                                                                                                                                                                                                                                                                                                                                                                                                                                                                                           |
| trifluoroacetate_thioester | C(F)(F)(F)C(=O)S                                                                                                                                                                                                                                                                                                                                                                                                                                                                                                                                                                                                                                                                                                                                                                                                                                                                                                                                                                                                                                                                                                                                                                                                                                           |
| trifluoromethyl_ketone     | [\$(C(=O));!\$(C-N);!\$(C-O);!\$(C-S)]C(F)(F)(F)                                                                                                                                                                                                                                                                                                                                                                                                                                                                                                                                                                                                                                                                                                                                                                                                                                                                                                                                                                                                                                                                                                                                                                                                           |
| trihalovinyl_heteroatom    | C(-[Cl,Br,I])(-[Cl,Br,I])=C(-[Cl,Br,I])(-[N,O,S])                                                                                                                                                                                                                                                                                                                                                                                                                                                                                                                                                                                                                                                                                                                                                                                                                                                                                                                                                                                                                                                                                                                                                                                                          |
| trinitro_aromatic          | [\$(a1aaa(\$\$(N(=O)=O)),\$([N+](=O)[O-]))a(\$\$(N(=O)=O)),\$([N+](=O)[O-]))a1(\$\$(N(=O)=O)),\$([N+](=O)[O-]))),\$(a1aa(\$\$(N(=O)=O)),\$([N+](=O)[O-]))a(\$\$(N(=O)=O)),\$([N+](=O)[O-]))aa1(\$\$(N(=O)=O)),\$([N+](=O)[O-]))),\$(a1a(\$\$(N(=O)=O)),\$([N+](=O)[O-]))aa(\$\$(N(=O)=O)),\$([N+](=O)[O-]))aa1(\$\$(N(=O)=O)),\$([N+](=O)[O-])))]                                                                                                                                                                                                                                                                                                                                                                                                                                                                                                                                                                                                                                                                                                                                                                                                                                                                                                          |
| trinitromethane_derivative | C(\$([N+](=O)[O-]),\$(N(=O)=O))(\$([N+](=O)[O-]),\$(N(=O)=O))(\$([N+](=O)[O-]),\$(N(=O)=O))                                                                                                                                                                                                                                                                                                                                                                                                                                                                                                                                                                                                                                                                                                                                                                                                                                                                                                                                                                                                                                                                                                                                                                |
| tris_activated_aryl_ester  | [\$(O=[C,S]Oc1a(\$\$(S(=O)=O)),F,\$(C(F)(F)(F)),\$(C#N),\$(N(=O)=O)),\$([N+](=O)[O-]),\$(C(=O)O),\$(C(=O)N))]a(\$\$(S(=O)=O)),F,\$(C(F)(F)(F)),\$(C#N),\$(N(=O)=O)),\$([N+](=O)[O-]),\$(C(=O)O),\$(C(=O)N))]a(\$\$(S(=O)=O)),F,\$(C(F)(F)(F)),\$(C#N),\$(N(=O)=O)),\$([N+](=O)[O-]),\$(C(=O)O),\$(C(=O)N))]aa1,\$(O=[C,S]Oc1a(\$\$(S(=O)=O)),F,\$(C(F)(F)(F)),\$(C#N),\$(N(=O)=O)),\$([N+](=O)[O-]),\$(C(=O)O),\$(C(=O)N))]a(\$\$(S(=O)=O)),F,\$(C(F)(F)(F)),\$(C#N),\$(N(=O)=O)),\$([N+](=O)[O-]),\$(C(=O)O),\$(C(=O)N))]aaa(\$\$(S(=O)=O)),F,\$(C(F)(F)(F)),\$(C#N),\$(N(=O)=O)),\$([N+](=O)[O-]),\$(C(=O)O),\$(C(=O)N))]1,\$(O=[C,S]Oc1a(\$\$(S(=O)=O)),F,\$(C(F)(F)(F)),\$(C#N),\$(N(=O)=O)),\$([N+](=O)[O-]),\$(C(=O)O),\$(C(=O)N))]aa(\$\$(S(=O)=O)),F,\$(C(F)(F)(F)),\$(C#N),\$(N(=O)=O)),\$([N+](=O)[O-]),\$(C(=O)O),\$(C(=O)N))]a(\$\$(S(=O)=O)),F,\$(C(F)(F)(F)),\$(C#N),\$(N(=O)=O)),\$([N+](=O)[O-]),\$(C(=O)O),\$(C(=O)N))]a1,\$(O=[C,S]Oc1a(\$\$(S(=O)=O)),F,\$(C(F)(F)(F)),\$(C#N),\$(N(=O)=O)),\$([N+](=O)[O-]),\$(C(=O)O),\$(C(=O)N))]aa(\$\$(S(=O)=O)),F,\$(C(F)(F)(F)),\$(C#N),\$(N(=O)=O)),\$([N+](=O)[O-]),\$(C(=O)O),\$(C(=O)N))]aa(\$\$(S(=O)=O)),F,\$(C(F)(F)(F)),\$(C#N),\$(N(=O)=O)),\$([N+](=O)[O-]),\$(C(=O)O),\$(C(=O)N))]1)] |
| trisub_bis_act_olefin      | [[CH;!R];!\$(C-N)]C(\$\$(S(=O)=O)),\$(C(F)(F)(F)),\$(C#N),\$(N(=O)=O)),\$([N+](=O)[O-]),\$(C(=O)))(\$\$(S(=O)=O)),\$(C(F)(F)(F)),\$(C#N),\$(N(=O)=O)),\$([N+](=O)[O-]),\$(C(=O)))                                                                                                                                                                                                                                                                                                                                                                                                                                                                                                                                                                                                                                                                                                                                                                                                                                                                                                                                                                                                                                                                          |
| unacceptable_atoms1        | [!#6;!#7;!#8;!#16;!#1;!#3;!#9;!#11;!#12;!#15;!#17;!#19;!#20;!#30;!#35]                                                                                                                                                                                                                                                                                                                                                                                                                                                                                                                                                                                                                                                                                                                                                                                                                                                                                                                                                                                                                                                                                                                                                                                     |
| unacceptable_atoms2        | [!#6;!#7;!#8;!#16;!#1;!#3;!#9;!#11;!#12;!#15;!#17;!#19;!#20;!#30;!#35;!#53]                                                                                                                                                                                                                                                                                                                                                                                                                                                                                                                                                                                                                                                                                                                                                                                                                                                                                                                                                                                                                                                                                                                                                                                |
| vinyl_carbonyl_EWG         | [C;!R](\$\$(S(=O)=O)),\$(C(F)(F)(F)),\$(C#N),\$(N(=O)=O)),\$([N+](=O)[O-]),\$(C=O))(\$\$(S(=O)=O)),\$(C(F)(F)(F)),\$(C#N),\$(N(=O)=O)),\$([N+](=O)[O-]),\$(C=O))=[C;!R]([C;!R](=O))(!(\$([#8]);!\$([#7])))                                                                                                                                                                                                                                                                                                                                                                                                                                                                                                                                                                                                                                                                                                                                                                                                                                                                                                                                                                                                                                                 |
| vinyl_sulfone              | O=S([#6]=[#6])([#6]=[#6])=O                                                                                                                                                                                                                                                                                                                                                                                                                                                                                                                                                                                                                                                                                                                                                                                                                                                                                                                                                                                                                                                                                                                                                                                                                                |
| vinylloxazole              | [N,C]=CC1=COC=N1                                                                                                                                                                                                                                                                                                                                                                                                                                                                                                                                                                                                                                                                                                                                                                                                                                                                                                                                                                                                                                                                                                                                                                                                                                           |
| 2,3,4-trihydroxyphenyl     | c([OH])c([OH])c([OH])                                                                                                                                                                                                                                                                                                                                                                                                                                                                                                                                                                                                                                                                                                                                                                                                                                                                                                                                                                                                                                                                                                                                                                                                                                      |

**Table S8.** Undesirable functionality SMARTS definitions utilised by the NIH.<sup>[3]</sup>

| Filter                           | SMARTS                                                                                                                                                                |
|----------------------------------|-----------------------------------------------------------------------------------------------------------------------------------------------------------------------|
| thiocarbonyl                     | [c,C]=[S;X1]                                                                                                                                                          |
| termalkyne                       | [CH]#C                                                                                                                                                                |
| quinonepara                      | O=[#6]1[#6]~[#6][#6](=O)[#6]~[#6]1                                                                                                                                    |
| nonpeptidic_macrocycle           | [!R0!r3!r4!r5!r6!r7!r8!\$(N;!H0,\$(N1[CH2][CH2][CH2][CH1]1))][CH]C=O!\$(CH)[(N;!H0,\$(N1[CH2][CH2][CH2][CH1]1))C=O)!\$(C(=O)[CH][N;!H0,\$(N1[CH2][CH2][CH2][CH1]1)))] |
| nitrogen_oxygen_bond             | *-[n,N]-[O;H0;R0]                                                                                                                                                     |
| methyl_ester_x2                  | [\$([CH3]OC=O)].[\$([CH3]OC=O)]                                                                                                                                       |
| imide                            | O=C([#6])NC(=O)[#6]                                                                                                                                                   |
| exocyclic_double_bond_toC        | [R;#7,#8,#16,#6X3][R]=!@C                                                                                                                                             |
| ethyl_ester_x2                   | [\$([CH2](OC=O)[CH3])[CH3].[\$([CH2](OC=O)[CH3])[CH3]                                                                                                                 |
| ester_deep_in_mol                | *[#6]C(=O)[O;R0][#6;\$(*(OC=O)**),\$(*(OC=O)(**))]                                                                                                                    |
| enoether                         | C=!@C[OD2]                                                                                                                                                            |
| conjugated_C=C                   | C=[C;R0][C;R0]=C                                                                                                                                                      |
| benzyl_ester                     | [\$([CH2](OC=O)c1[cH][cH][cH][cH]1)c1[cH][cH][cH][cH]1                                                                                                                |
| aromatic_tricyclic1              | c1ccc3c(c1)[C;!\$(C=O)]c2cccc23                                                                                                                                       |
| allyl_ester                      | [\$([CH2](OC=O)[CH]=[CH2])[CH]=[CH2]                                                                                                                                  |
| alkylNandNonC                    | N[CX4]!@N                                                                                                                                                             |
| alkCl                            | [C][C]!\$(C(C)(Cl)(Cl))]                                                                                                                                              |
| alkBr                            | CBr                                                                                                                                                                   |
| acyclic_sulphur_michael_acceptor | [C!\$(*[Nv3X3])]=!@[C!\$(*[Nv3X3])[S!\$(*[Nv3X3])]=O                                                                                                                  |
| acyclic_imine                    | [C!\$(*(=N)[N,n])]=!@[Nv3!\$(*O)]                                                                                                                                     |
| acyclic_hydrazine                | [Nv3X3!\$(*(C=O)NC=O)]!@[Nv3X3!\$(*(C=O)NC=O)]                                                                                                                        |
| acetyl_x2                        | [CH3]C(=O)O.[CH3]C(=O)O                                                                                                                                               |
| acetal                           | [OX2;\$(OC[OX2])][C;!\$(C1(O)CNCCO1);!(C1(O)(CO)OC(CO)C(O)C1O);!(C1(O)OC(CO)C(O)C(O)C1O)][OX2][!a]                                                                    |
| OCO_protecting_group             | [O;R0][C;X4][O;R0]                                                                                                                                                    |
| N-SO_group                       | N[S;!\$(S(=O)(=O))]=O                                                                                                                                                 |
| C=N=O_gp                         | C=N=O                                                                                                                                                                 |
| C(=O)CC(=O)_gp                   | [c,C]C(=O)[C!H0!R]C(=O)[C,c]                                                                                                                                          |
| 4_fused_ring_sys                 | [R2][R3][R2][R2][R2]                                                                                                                                                  |
| C#C                              | C#C.C#C                                                                                                                                                               |
| C#C-c_gp                         | cC#[C!H1]                                                                                                                                                             |
| 3_mem_ring_with_het              | [S,O,N;r3]                                                                                                                                                            |
| acylcarbamate                    | O=[S,C]NC(=O)O                                                                                                                                                        |
| anyNO                            | [Nv3,n]=O                                                                                                                                                             |
| phenol_x2                        | [OH][c;\$(c1ccccc1)].[OH][c;\$(c1ccccc1)]                                                                                                                             |
| formamide                        | [#7;!\$(N(OH))][CH1]=O                                                                                                                                                |
| benzyl_halide                    | [CX4](a)[F,Cl,Br,I;!\$(FC(F)F)]                                                                                                                                       |

**Table S9.** Undesirable functionality SMARTS definitions that comprise the 'GSKB' filter.<sup>[4]</sup>

| Filter       |                      |
|--------------|----------------------|
| Acyl halide  | Disulfide            |
| Aldehyde     | Hydrazine (terminal) |
| Alkyl halide | Isocyanate           |
| Anhydride    | Isothiocyanate       |
| Diazo        | Peroxide             |
| Dicarbonyl   | Quaternary ammonium  |

**Table S10.** Undesirable functionality filters used in the 'HTS Filter' embedded in Pipeline Pilot.

### 3.0 References

- [1] A. S. Deeming, C. J. Russell, M. C. Willis, *Angew. Chem. Int. Ed. Engl.* **2015**, *54*, 1168–71.
- [2] N. C. Firth, N. Brown, J. Blagg, *J. Chem. Inf. Model.* **2012**, *52*, 2516–25.
- [3] A. Jadhav, R. S. Ferreira, C. Klumpp, B. T. Mott, C. P. Austin, J. Inglese, C. J. Thomas, D. J. Maloney, B. K. Shoichet, A. Simeonov, *J. Med. Chem.* **2010**, *53*, 37–51.
- [4] A. Nadin, C. Hattotuwigama, I. Churcher, *Angew. Chem. Int. Ed.* **2012**, *51*, 1114–1122.
